# Supplementary material for: Impact of universal health insurance coverage in Thailand on sales and market share of medicines for non-communicable diseases: an interrupted time series study
Source: PubMed Central journal article supplement — BMJ Open. 2012 Nov 27;2(6):e001686. doi: 10.1136/bmjopen-2012-001686 (PMC3533018; doi:10.1136/bmjopen-2012-001686), 2012-11-27
Supplement: bmjopen-2012-001686.draft_revisions.pdf [file bmjopen-2012-001686.draft_revisions.pdf]

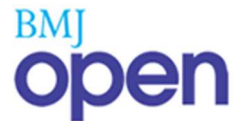

**Impact of Universal Health Insurance Coverage in Thailand  
on Sales and Market Share of Medicines for Non-  
Communicable Diseases: An Interrupted Time Series Study**

|                                 |                                                                                                                                                                                                                                                                                                                                                                                                                                                                                                       |
|---------------------------------|-------------------------------------------------------------------------------------------------------------------------------------------------------------------------------------------------------------------------------------------------------------------------------------------------------------------------------------------------------------------------------------------------------------------------------------------------------------------------------------------------------|
| Journal:                        | <i>BMJ Open</i>                                                                                                                                                                                                                                                                                                                                                                                                                                                                                       |
| Manuscript ID:                  | bmjopen-2012-001686                                                                                                                                                                                                                                                                                                                                                                                                                                                                                   |
| Article Type:                   | Research                                                                                                                                                                                                                                                                                                                                                                                                                                                                                              |
| Date Submitted by the Author:   | 29-Jun-2012                                                                                                                                                                                                                                                                                                                                                                                                                                                                                           |
| Complete List of Authors:       | Garabedian, Laura; Harvard Medical School and Harvard Pilgrim Health Care Institute, Department of Population Medicine<br>Ross-Degnan, Dennis; Harvard Medical School and Harvard Pilgrim Health Care Institute, Department of Population Medicine<br>Ratanawijitrasin, Sauwakon; Mahidol University, Faculty of Social Sciences and Humanities<br>Stephens, Peter; IMS Health,<br>Wagner, Anita; Harvard Medical School and Harvard Pilgrim Health Care Institute, Department of Population Medicine |
| <b>Primary Subject Heading</b>: | Global health                                                                                                                                                                                                                                                                                                                                                                                                                                                                                         |
| Secondary Subject Heading:      | Health policy, Health economics, Health services research, Pharmacology and therapeutics, Public health                                                                                                                                                                                                                                                                                                                                                                                               |
| Keywords:                       | Health policy < HEALTH SERVICES ADMINISTRATION & MANAGEMENT, Health economics < HEALTH SERVICES ADMINISTRATION & MANAGEMENT, Essential Medicines, CARDIOLOGY, DIABETES & ENDOCRINOLOGY, ONCOLOGY                                                                                                                                                                                                                                                                                                      |
|                                 |                                                                                                                                                                                                                                                                                                                                                                                                                                                                                                       |

SCHOLARONE™  
Manuscripts

## TITLE PAGE

**Impact of Universal Health Insurance Coverage in Thailand on Sales and Market Share of Medicines for Non-Communicable Diseases: an Interrupted Time Series Study**

Laura Faden Garabedian, MPH<sup>1</sup>, Dennis Ross-Degnan, ScD<sup>1</sup>, Sauwakon Ratanawijitrasin, PhD<sup>2</sup>, Peter Stephens, MA<sup>3</sup>, Anita Wagner, PharmD, MPH, DrPH<sup>1</sup>

*Institutions:*

<sup>1</sup> Drug Policy Research Group and WHO Collaborating Center in Pharmaceutical Policy  
Department of Population Medicine, Harvard Medical School and Harvard Pilgrim Health Care  
Institute  
133 Brookline Ave., Sixth Floor  
Boston, MA, USA

Dennis Ross-Degnan and Anita Wagner are Associate Professors. Laura Faden Garabedian is a Research Fellow and PhD Candidate.

Corresponding author: Laura Faden Garabedian

Phone: +1 617 509 9921

Email: lfaden@fas.harvard.edu

<sup>2</sup> Professor

Faculty of Social Sciences and Humanities, Mahidol University  
Salaya, Buddhamonthon, Nakhonpathom, 73170 Thailand

<sup>3</sup> Director, Public Health Affairs

IMS Health

7 Harewood Avenue

London, NW1 6JB, UK

**Study Design:** Observational study (interrupted time series design)

**Acknowledgements:** We gratefully acknowledge support of statistical analyses by Dr. Fang Zhang, Department of Population Medicine, Harvard Medical School and Harvard Pilgrim Health Care Institute, Boston, USA. Dr. Sanita Hirunrassamee, Phramongkutklao Hospital, Bangkok, Thailand, provided helpful input on Thai essential medicines listings and coverage policies. Mr. Amit Backliwal, at the time of the study at IMS Health, Bangkok, Thailand, shared valuable insights on the Thai pharmaceutical market.

**Author contributions:** Laura Garabedian, Dennis Ross-Degnan and Anita Wagner designed the study and developed the analytic approach. Peter Stephens assembled the data files. Laura Garabedian analyzed the data. Sauwakon Ratanawijitrasin provided the Thai national list of essential medicines and information on relevant Thai policies and context surrounding the reform. All authors participated in the interpretation of the results. Laura Garabedian wrote the first draft of the paper. All authors contributed to the writing of the manuscript.

1  
2  
3  
4  
5  
6  
7  
8  
9  
10  
11  
12  
13  
14  
15  
16  
17  
18  
19  
20  
21  
22  
23  
24  
25  
26  
27  
28  
29  
30  
31  
32  
33  
34  
35  
36  
37  
38  
39  
40  
41  
42  
43  
44  
45  
46  
47  
48  
49  
50  
51  
52  
53  
54  
55  
56  
57  
58  
59  
60

Opinions expressed are solely those of the authors and not of the institutions they represent.

**Competing Interest Statement:** All authors have completed the Unified Competing Interest form at [www.icmje.org/coi\\_disclosure.pdf](http://www.icmje.org/coi_disclosure.pdf) (available on request from the corresponding author) and declare: LFG had financial support from Harvard Medical School and Harvard University, AW and DRD were supported in part by a grant from the Novartis Foundation for Sustainable Development, PS is an employee of IMS Health; no financial relationships with any organisations that might have an interest in the submitted work in the previous 3 years; no other relationships or activities that could appear to have influenced the submitted work.

**Funding:** IMS Health provided the data in-kind. The Harvard Medical School Fellowship in Pharmaceutical Policy Research and the Harvard University PhD Program in Health Policy supported Ms. Garabedian. Drs. Wagner and Ross-Degnan were supported in part by a grant from the Novartis Foundation for Sustainable Development to develop examples of research on access to medicines using IMS Health data for presentation at the Third International Conference for Improving Use of Medicines.

**IRB Approval:** Harvard Pilgrim Health Care Institute Office of Sponsored Programs

**Exclusive Licence Statement:** The Corresponding Author has the right to grant on behalf of all authors and does grant on behalf of all authors, [a worldwide licence](#) to the Publishers and its licensees in perpetuity, in all forms, formats and media (whether known now or created in the future), to i) publish, reproduce, distribute, display and store the Contribution, ii) translate the Contribution into other languages, create adaptations, reprints, include within collections and create summaries, extracts and/or, abstracts of the Contribution, iii) create any other derivative work(s) based on the Contribution, iv) to exploit all subsidiary rights in the Contribution, v) the inclusion of electronic links from the Contribution to third party material where-ever it may be located; and, vi) licence any third party to do any or all of the above.

**Data Sharing Statement:** Data available upon request, at the approval of IMS Institute for Healthcare Informatics.

## Article Summary

### Article Focus

- Medicines present a key challenge to achieving universal coverage.
- Health insurance systems have the potential to improve cost-effective use of medicines, yet there is little evidence about their impact on medicine use in low and middle income countries.
- The recent implementation of universal health coverage in Thailand presents a unique opportunity to measure the impact of health insurance expansion and associated physician payment changes on utilization of medicines.

### Key Messages

- Expanding health insurance coverage with a medicines benefit to the entire Thai population increased access to medicines in primary care.
- The universal coverage scheme did not seem to have increased use of medicines for diseases that are typically treated in secondary or tertiary care settings, or increased generic market penetration.
- In the future, it will be important for countries to assess quality and equity of medicines use as they pursue policies to achieve universal coverage.

### Strengths and Limitations

- We used an interrupted time series design, the strongest quasi-experimental approach for evaluating effects of interventions, increasing internal validity.
- It is impossible to examine population subgroups in national IMS Health market data, but we are reasonably confident that universal coverage scheme enrollees are responsible for observed changes.

## ABSTRACT

**Objective:** In 2001, Thailand implemented the Universal Coverage Scheme (UCS), a public insurance system covering primarily the poor and uninsured that aimed to achieve universal access to health care, including essential medicines, and to influence provider behavior to use resources efficiently via capitated payment. Our objective was to evaluate the impact of the UCS on utilization of medicines in Thailand for three non-communicable diseases: cancer, cardiovascular disease, and diabetes.

**Design:** Interrupted time series design, with a non-equivalent comparison group.

**Setting:** Thailand, 1998-2006.

**Data:** Quarterly purchases of medicines from hospital and retail pharmacies collected by IMS Health between 1998 and 2006.

**Intervention:** UCS implementation, April-October 2001.

**Outcome measures:** Total pharmaceutical sales volume and percent market share by licensing status.

**Results:** The UCS was associated with long-term increases in sales of medicines for conditions that are typically treated in outpatient primary care settings, such as diabetes, high cholesterol and high blood pressure, but not for medicines for diseases that are typically treated in secondary or tertiary care settings, such as heart failure, arrhythmias, and cancer. While the majority of increases in sales were for essential medicines, there were also significant post-policy increases in sales of non-essential medicines. Immediately following the reform, there was a significant shift in hospital sector market share by licensing status for most classes of medicines.

Government-produced products often replaced branded generic or generic competitors.

**Conclusions:** Our results suggest that expanding health insurance coverage with a medicines benefit to the entire Thai population increased access to medicines in primary care. However, our study also suggests that the UCS may have had potentially undesirable effects. Evaluations of the long-term impacts of universal health coverage on medicines utilization are urgently needed.

## MANUSCRIPT

### Introduction

#### *Universal Health Coverage*

In 2005, Member States of the World Health Organization (WHO) made a commitment to work towards universal health care coverage.<sup>1</sup> The 2010 WHO World Health Report provides a roadmap for countries to achieve this goal.<sup>2</sup> Universal coverage requires the restructuring of health care and financing systems to improve access to health care services, reduce financial hardship, and increase the efficiency and equity of the health system.<sup>2</sup>

Medicines, which consume 25–65% of total public and private spending on health in developing countries,<sup>3</sup> present a key challenge to achieving universal coverage. According to the WHO, three of the top ten sources of health care inefficiency involve medicines: high medicine prices and underuse of generics; use of substandard and counterfeit medicines; and inappropriate and ineffective use of medicines.<sup>2</sup> Health insurance systems have several features (e.g., a defined population, access to utilization data, and financial leverage) that give them a unique advantage to reduce out-of-pocket (OOP) expenditures and improve the cost-effective use of medicines through active management strategies involving medicines selection, purchasing, contracting (e.g., physician payment) and utilization management.<sup>4</sup> However, there is little evidence about the impact of health insurance on access to and use of medicines in low- and middle-income countries (LMICs).<sup>4</sup>

The recent implementation of universal health coverage in Thailand presents a unique opportunity to measure the impact of health insurance expansion and physician payment changes (from fee-for-service to capitation) on utilization of medicines.

#### *Universal Health Coverage in Thailand*

With the implementation of the UCS in 2001, Thailand became one of the first LMICs to achieve universal coverage.<sup>5,6</sup> The reforms preserved the formal sector workforce schemes: the Social Health Insurance (SHI) scheme for private sector employees (6.3% of the total population) and the Civil Service Medical Benefit Scheme (CSMBS) for government employees and their

1  
2  
3 dependents (13·6%).<sup>7</sup> In addition, the UCS covered those previously enrolled in a voluntary  
4 health card (VHC) scheme (22·0%), in private health insurance (1·6%), or in a tax-based, means-  
5 tested Low Income Scheme (LIS) for the poor, elderly, children and disabled (28·9%)<sup>7,8</sup> as well  
6 as more than one quarter (26·6%) of the population without previous insurance.<sup>7</sup> The UCS was  
7 rolled out to all provinces between April and October 2001.<sup>5</sup> By 2005, 95·5% of the population  
8 was insured, with just over 70% of the population covered by the UCS.<sup>7</sup>  
9  
10  
11  
12  
13

14  
15  
16 The UCS is a compulsory, tax-financed scheme with comprehensive coverage of inpatient and  
17 outpatient services, including medicines on the National List of Essential Medicines (NLEM).<sup>5</sup>  
18 Individuals must enroll in the scheme at a local Contracting Unit for Primary Care (CUP),<sup>5</sup>  
19 primarily housed in government-owned hospitals.<sup>9</sup> Each CUP receives a capitated payment per  
20 registered member to provide outpatient services and medicines.<sup>5</sup> CUPs served as gate-keepers  
21 for secondary and tertiary hospitals. When patients were referred, payments for higher-level care  
22 initially came out of the CUP's capitated payment, so CUPs had a financial disincentive to refer  
23 patients.<sup>5</sup>  
24  
25  
26  
27  
28  
29  
30

31  
32 Our objective was to evaluate the immediate, short-term (one year) and long-term (five year)  
33 impacts of the UCS on pharmaceutical market size and composition for medicines for three non-  
34 communicable diseases (NCDs): cancer, cardiovascular disease, and diabetes. We hypothesized  
35 that the UCS would result in a gradual increase in sales volume, particularly of products used in  
36 primary care, as enrollment into the Scheme increased, and in an immediate increase in market  
37 share of less expensive generic or branded generic products and medicines on the NLEM in  
38 response to capitated payment rules. We focused on medicines for NCDs since these illnesses  
39 represent a large and growing health care burden in Thailand<sup>10–13</sup> and other LMICs<sup>14</sup> and most,  
40 but not all, medicines for NCDs would be prescribed and dispensed in primary care settings.  
41  
42  
43  
44  
45  
46  
47

## 48 **Methods**

### 49 *Data*

50 We used data on quarterly pharmaceutical sales in Thailand from 1998 to 2006 provided by IMS  
51 Health.<sup>15</sup> The sales data are generated from reports to IMS Health by multinational  
52 pharmaceutical companies and surveys of purchases by hospital and retail pharmacies. IMS  
53 surveys approximately 200 hospitals (including general and specialized, public and private) and  
54  
55  
56  
57  
58  
59  
60

1  
2  
3 350 retail pharmacies in Thailand, and employs a stratified random sample of these facilities that  
4 enables national projections. Medicines were classified according to the European  
5 Pharmaceutical Research Association (EphMRA) Anatomical Therapeutic Chemical (ATC)  
6 system.<sup>16</sup>  
7  
8  
9

### 10 11 12 **Outcomes**

13  
14 We used two outcome measures: total volume and percent market share. *Total volume* is the  
15 number of standard units purchased per capita per quarter (i.e., “sales”). We analyzed total  
16 volume by sector (i.e., retail versus hospital) and, within the hospital sector, by NLEM versus  
17 non-NLEM status of medicines (based on the 1999 Thai NLEM). A standard unit, as defined by  
18 IMS Health, is the smallest dose of a product, which equates to one tablet or capsule for an oral  
19 dosage form, one teaspoon (5ml) for a syrup, and one ampoule or vial for an injectable product.  
20 We divided total volume by size of the population over 15 years old to control for population  
21 growth (using yearly population estimates from the World Bank<sup>17</sup>). We used the entire  
22 population as denominator for insulins, since they are also used for Type 1 diabetes, a chronic  
23 disease that affects children. *Percent market share* is the percent of total volume in four mutually  
24 exclusive categories of licensing status: originator brand products, branded generic products  
25 (products sold under a brand name other than the originator brand name of the molecule), generic  
26 products (products that are sold under the generic molecule name), and products manufactured  
27 by Thailand’s Government Pharmaceutical Organization (GPO).  
28  
29  
30  
31  
32  
33  
34  
35  
36  
37  
38  
39

40 We analyzed total volume and market share for medicines in eight therapeutic classes: two  
41 classes of diabetes products (oral antidiabetics and insulins), three classes of cardiovascular  
42 disease products (antihypertensives, lipid-regulating, and cardiac therapy products) and three  
43 classes of cancer products (antineoplastics, immunostimulating agents, and cytostatic hormone  
44 therapy products); Table 1 in the online appendix lists all medicines by ATC code. Antidiabetic,  
45 insulin, antihypertensive and lipid-lowering products are used for conditions that are typically  
46 treated in primary care settings (i.e., diabetes, high blood pressure and high cholesterol), whereas  
47 cardiac therapy and cancer products are used for more severe conditions that are more likely to  
48 be treated by a specialist and/or in inpatient settings.  
49  
50  
51  
52  
53  
54  
55  
56  
57  
58  
59  
60



### ***Research Design***

We used an interrupted time series design, the strongest quasi-experimental approach for evaluating effects of interventions, which has been used extensively for medication use research.<sup>18</sup> Although we did not have an equivalent control group, we used medicines sold in the retail sector as a non-equivalent comparison group,<sup>19</sup> assuming that the retail market should be relatively unaffected by the reforms since UCS enrollees could only obtain covered medicines through their local, hospital-based CUP.

### ***Statistical Analysis***

The intervention was the UCS roll-out from April to October 2001. We defined three distinct periods: 12 quarters pre-reform (1998Q2-2001Q1), a 3-quarter UCS roll-out period (2001Q2-2001Q4; grey box in figures), and 19 quarters post-reform (2002Q1-2006Q3). We dropped 2006Q4 from the analysis since there was a policy change at this time (the removal of an initial 30 Baht co-payment per visit) that may have impacted outcomes. In sensitivity analyses, we extended the intervention roll-out period through 2002 and through 2003 to account for potentially delayed implementation and lag of actual enrollment into the scheme.

We used segmented linear regression to measure the pre-reform trend, the immediate level change following the intervention period, and the post-reform change in trend (as compared to the pre-reform trend). We controlled for serial autocorrelation using an autoregressive error model. We retained all terms in the models, even if non-significant. We used the models to estimate absolute and relative differences (with 95% confidence intervals)<sup>20</sup> in observed versus predicted total volume at one year and five years post-reform. In sensitivity analyses, we included a quadratic term for the post-reform trend and used a likelihood ratio test to determine the best-fitting model. We report below results from the best-fitting model of the shortest (i.e., 3 quarter) intervention period and mention differences in model results where they existed. Results from sensitivity analyses are available upon request. We used the AUTOREG procedure in SAS 9.2 for all analyses.

## **Results**

### ***Hospital Sector Volume***

1  
2  
3 The majority of sales in Thailand for all cancer, cardiovascular disease and diabetes medicines  
4 studied were in the hospital sector and were for medicines on the NLEM. After implementation  
5 of the UCS, there was a significant increase in level of sales of insulins and a significant increase  
6 in trend in sales of antidiabetic, insulin, antihypertensive, lipid regulating, and cytostatic  
7 hormone products [Table 1, Figures 1 and 2]. There was a significant reduction in level of sales  
8 immediately following the reforms for three medication classes: antihypertensive, cardiac  
9 therapy and immunostimulating agents (although only the latter was significant in the sensitivity  
10 analyses using a longer intervention period).  
11  
12  
13  
14  
15  
16  
17  
18

19 The UCS was associated with increased sales of diabetes medicines. One year after the policy,  
20 the sale of insulin was 35% (95% CI: 15%, 55%) higher and, at five years, 174% (95% CI:  
21 114%-235%) higher than what would have been expected in the absence of the UCS [Table 2].  
22 The increase in insulin sales was driven primarily by human insulins, which are on the NLEM  
23 and marketed as branded generics by two manufacturers. The policy was associated with a 39%  
24 (95% CI: 14%, 64%) increase in antidiabetic product sales five years after implementation  
25 [Table 2]. This is largely due to increased sales of generic and branded generic metformin and  
26 glibenclamide products, both of which are on the NLEM.  
27  
28  
29  
30  
31  
32  
33  
34

35 Implementation of the UCS appears to have had a mixed impact on sales of cardiovascular  
36 medicines. Five years after the policy, the sale of lipid lowering agents was nearly double (108%  
37 increase; 95% CI: 60%, 157%) what would have been expected in the absence of the scheme  
38 [Table 2]. The increase was primarily due to sales of branded generic simvastatin and  
39 gemfibrozil products, which are on the NLEM, and a small but steady increase in sales of  
40 originator atorvastatin products, which are not on the NLEM. For antihypertensives, the  
41 significant increase in post-policy trend compensated for an initial drop in sales, resulting in a  
42 slight increase in sales five years after the policy (19% increase; 95% CI: -3%, 40%). The  
43 increased trend was primarily due to sales of enalapril, atenolol, and amlodipine, all of which are  
44 on the NLEM and predominately sold as branded generics. The reform had no significant impact  
45 on sales of cardiac therapy medicines one or five years after the policy.  
46  
47  
48  
49  
50  
51  
52  
53  
54  
55  
56  
57  
58  
59  
60

1  
2  
3 The results were also mixed for cancer medicines. The UCS had no significant one- or five-year  
4 impact on the sale of antineoplastics or cytostatic hormones (although the latter class did  
5 experience a significant post-policy increase in trend). However, the policy was associated with  
6 an immediate reduction in sales of immunostimulating agents that did not recover in the post-  
7 policy period. One year after implementation, the sale of immunostimulating agents was 35%  
8 (95% CI: -45%, -25%) lower than expected from pre-policy trends, and 26% lower (95% CI: -  
9 45%, -8%) five years post-policy. This drop is almost entirely due to a sharp reduction in sales of  
10 interferon alfa-2b, a non-NLEM medicine, around the time of UCS implementation, which could  
11 have been due to a co-incidental recall of an interferon alfa-2b product.<sup>21</sup>  
12  
13  
14  
15  
16  
17  
18  
19  
20

21 There was mixed evidence about the effects of the UCS on utilization of NLEM medicines. For  
22 all classes that experienced a post-policy increase in trend, there was an increase in sales of both  
23 NLEM medicines (except for cytostatic hormones) *and* non-NLEM products [see online  
24 appendix, Table 3]. The immediate decrease in sales of cardiac therapies and immunostimulating  
25 agents was largely due to a decrease in non-NLEM medicines. However, for these two classes,  
26 there was no corresponding increase in NLEM medicines.  
27  
28  
29  
30  
31  
32

33 Finally, as expected, the reform had little impact on sales volume in the retail sector – there were  
34 few significant post-implementation changes, and the changes that were significant were small in  
35 magnitude [see online appendix, Table 2].  
36  
37  
38  
39  
40

### 41 *Hospital Sector Market Share*

42 Immediately following the reform, there were significant shifts in hospital sector market share by  
43 licensing status for most classes [Table 3]. The changes for antidiabetics and cardiac medicines -  
44 the two therapeutic classes with the largest shifts – were due to significant increases in GPO-  
45 produced medicines, primarily at the expense of branded generics and, to a lesser extent,  
46 generics. There was a significant increase in GPO antidiabetic products (+16% of market; 95%  
47 CI: 12%, 20%), and decreases in branded generic (-12%; 95% CI: -16%, -9%) and generic (-4%;  
48 95% CI: -6%, -1%) products immediately after the policy [Figure 3]. Similarly, there was a  
49 significant increase in GPO cardiac therapy products (+22%; 95% CI: 15%, 28%), and  
50 significant decreases of branded generic (-14%; 95% CI: -21%, -7%) and generic (-4%; 95% CI: -  
51  
52  
53  
54  
55  
56  
57  
58  
59  
60

1  
2  
3 6%, -2%) products immediately after the policy [Figure 4]. There was also a small decrease in  
4 market share of generic antihypertensives (-6%; 95% CI: -8%, -3%), which was compensated for  
5 by a marginally significant increase in GPO products.  
6  
7  
8

9  
10 The market for lipid regulating agents experienced an immediate shift from originator products (-  
11 8% market share; 95% CI: -10%, -5%) to branded generics (+8%; 95% CI: 5%, 10%). A similar  
12 shift was seen for in the market for immunostimulating agents (6% decrease in originator  
13 products [95% CI:-10%, -3%] and a 5% increase in branded generics [95% CI:2%, 7%]). The  
14 cytostatic hormone market experienced an immediate shift from branded generic (-8%; 95% CI:-  
15 12%, -4%) to generic products (+6%, 95% CI: 1%, 11%). Generic insulins experienced a slight  
16 decrease in market share caused by the market exit of the sole generic manufacturer just prior to  
17 the policy. There were no immediate changes in market share for antineoplastics. Aside from the  
18 immediate level changes following the policy, there were few major changes in market share for  
19 all classes.  
20  
21  
22  
23  
24  
25  
26  
27

## 28 29 30 **Discussion**

31 The UCS was associated with long-term (i.e., 5 year) increases in hospital sector sales of  
32 medicines for chronic diseases that are usually treated in primary care settings, such as diabetes,  
33 high blood pressure, and high cholesterol. We hypothesized this gradual increase in volume since  
34 the UCS expanded access to primary care<sup>7</sup> and actual enrollment into the scheme occurred  
35 gradually from implementation in 2001 until around 2005, by which time 95.5% of the  
36 population had insurance coverage.<sup>7</sup> The UCS, which radically changed hospital financing and  
37 reimbursement, was also associated with an immediate market shift to locally produced or  
38 branded generic products for most therapeutic classes.  
39  
40  
41  
42  
43  
44  
45  
46  
47

48 Despite these increases in access, the policy did not appear to increase sales of medicines for  
49 more severe diseases like heart failure, arrhythmias, and cancer, which are often treated in  
50 secondary or tertiary settings. This finding is in line with evidence that the capitated payment  
51 system discouraged referrals of UCS patients to higher-level care.<sup>5,7,22</sup> The UCS also appears to  
52 have had a mixed impact on utilization of essential medicines. There were increases in NLEM  
53 medicines, which are covered, as well as non-NLEM medicines. Similarly, given the capitated  
54  
55  
56  
57  
58  
59  
60

1  
2  
3 UCS payment system, we expected to see an increase in sales of generic medicines, which are  
4 typically less expensive. However, the majority of sales in most classes were for branded generic  
5 products, many of which had generic alternatives in the market. Interestingly, substantial market  
6 share shifts occurred toward products manufactured by the Thai GPO, which by law received  
7 preferential status by hospital purchasers.<sup>23</sup> GPO products have been noted to have higher than  
8 market prices<sup>24</sup> and sometimes to be of substandard quality.<sup>25</sup>

9  
10  
11  
12  
13  
14  
15  
16 Our study demonstrates the value of IMS Health market intelligence data for rigorous health  
17 policy evaluation. Unlike other sources of data on pharmaceutical utilization (i.e., national health  
18 surveys or ad hoc hospital surveys), IMS data represent country pharmaceutical markets  
19 consistently over time and are useful for the evaluation of system-wide interventions.  
20  
21 Nevertheless, the data pose some limitations. Aggregate national sales data do not allow us to  
22 determine whether observed increases in medicines sales occurred preferentially among UCS  
23 enrollees or enrollees in the SHI and CSMBS schemes, conceivably to compensate for financial  
24 strain of the UCS on hospital budgets.<sup>5</sup> CSMBS expenditures increased following UCS  
25 implementation<sup>26</sup> and increased medicines sales among CSMBS, reimbursed on a fee-for-service  
26 basis, could explain increases in non-NLEM medicines and medicines with less expensive  
27 therapeutic alternatives.<sup>27</sup> However, it is unlikely that increased utilization among CSMBS  
28 enrollees explains most of the observed volume changes since it would imply that one-quarter  
29 (for diabetes) to one-third (for hypertension) of CSMBS members were on these treatments and  
30 the change in utilization would have needed to be coincident with the initiation of the UCS.  
31  
32  
33  
34  
35  
36  
37  
38  
39  
40  
41

42 Our interpretation of the observed changes assumes that pharmaceutical sales to hospital and  
43 retail pharmacies reflected total market utilization, and that hospital sales volumes included  
44 utilization at affiliated primary care units. This assumption seems justified in light of the  
45 estimated 91% accuracy of IMS Health data in representing the Thai pharmaceutical market.<sup>28</sup>  
46 For local generic products, including those produced by the GPO, IMS Health data is based on  
47 pharmacy surveys only (as opposed to pharmacy surveys and manufacturer reports), so we may  
48 have underestimated utilization. Finally, since we did not convert standard units of product sold  
49 to defined daily doses (DDD), we do not describe sales changes in terms of average adult doses.  
50  
51  
52  
53  
54  
55  
56  
57  
58  
59  
60

1  
2  
3 There are also potential limitations due to study design and statistical analysis. We addressed the  
4 main threat to the internal validity of the interrupted time series design - a concurrent event that  
5 affects the outcome of interest - by assessing other policies or market events that occurred at the  
6 time of the UCS, through literature reviews, discussions with in-country experts, and by  
7 including the retail sector as a comparison. The statistical approach, segmented regression  
8 analysis, usually assumes a linear trend and well-defined break point. Sensitivity analyses that  
9 varied model specification and intervention duration did not change the findings. By reporting  
10 results from fully-specified models, we may have underestimated the statistical significance of  
11 one- and five-year change estimates.  
12  
13  
14  
15  
16  
17  
18  
19  
20

21 While both the context and the implementation of universal coverage in Thailand are unique, our  
22 findings suggest that expanding health insurance coverage with a medicines benefit to the entire  
23 population in a LMIC increased the volume of medicines sold and, by inference, improved  
24 access to medicines in the primary care sector. Since the study period, Thailand has enacted  
25 further policies to address pharmaceutical sector cost escalation (e.g., strict enforcement of  
26 reimbursement for only NLEM medicines in the CSMBS<sup>29</sup>) and to ensure appropriate access to  
27 non-NLEM medicines (e.g., coverage of medicines for HIV, renal replacement therapy, and  
28 mental health conditions).<sup>30-32</sup> In the future, it will be important for Thailand and other countries  
29 to assess quality of medicines use, out-of-pocket and system expenditures, and health outcomes  
30 as they pursue policies to achieve universal coverage.  
31  
32  
33  
34  
35  
36  
37  
38  
39  
40  
41  
42  
43  
44  
45  
46  
47  
48  
49  
50  
51  
52  
53  
54  
55  
56  
57  
58  
59  
60

## References

- 1 World Health Organization. Resolution from the fifty-eight World Health Assembly. Sustainable health financing, universal coverage and social health insurance (WHA58.33) [Internet]. 2005 [cited 2011 Mar 8]. Available from: [http://www.who.int/providingforhealth/topics/WHA58\\_33-en.pdf](http://www.who.int/providingforhealth/topics/WHA58_33-en.pdf).
- 2 World Health Organization. 2010 World Health Report: Health systems financing: the path to universal coverage [Internet]. 2010 [cited 2011 Mar 8]. Available from: <http://www.who.int/whr/2010/en/index.html>.
- 3 J. Quick, Ensuring access to essential medicines in developing countries—A framework for action. *Clinical Pharmacology and Therapeutics* 2003; 73(4): 279–283.
- 4 Faden L, Vialle-Valentin C, Ross-Degnan D, Wagner A. Active pharmaceutical management strategies of health insurance systems to improve cost-effective use of medicines in low- and middle-income countries: a systematic review of current evidence. *Health Policy*. 2011; 100(2-3): 134-143.
- 5 Hughes D, Leethongdee S. Universal coverage in the land of smiles: lessons from Thailand's 30 Baht health reforms. *Health Aff (Millwood)*. 2007; 26(4): 999-1008.
- 6 The Rockefeller Foundation. Catalyzing Change: The System Reform Costs of Universal Health Coverage [Internet]. 2010 Nov 15 [cited on 2011 Mar 8]. Available from: <http://www.rockefellerfoundation.org/news/publications/catalyzing-change-system-reform-costs>.
- 7 Damrongplisit K, Melnick GA. Early results from Thailand's 30 Baht Health Reform: something to smile about. *Health Aff (Millwood)*. 2009; 28(3): w457-466.
- 8 Tangcharoensathien V, Wibulpholprasert S, Nitayaramphong S. Knowledge-based changes to health systems: the Thai experience in policy development. *Bull. World Health Organ*. 2004; 82(10): 750-756.
- 9 NaRanong V, NaRanong, A, Treamworakul S. Universal Health Coverage Schemes in Thailand 2002-2003. Research Report No.1: Monitoring and Evaluating Universal Health Care Coverage in Thailand, Phase II, 2003-04. Bangkok: Thailand Development Research Institute; 2004.
- 10 Kaufman N, Chasombat S, Tanomsingh S, Rajataramya B, Potempa K. Public health in Thailand: emerging focus on non-communicable diseases. *Int J Health Plann Manage*. 2011; 26(3): e197-212
- 11 Bundhamcharoen K, Odton P, Phulkerd S, Tangcharoensathien V. Burden of disease in Thailand: changes in health gap between 1999 and 2004. *BMC Public Health*. 2011;11: 53.

- 1  
2  
3 12 World Health Organization. Thailand: Health Profile [Internet]. 2011 Apr 11 [cited 2012  
4 Feb 8]. Available from: <http://www.who.int/gho/countries/tha.pdf>  
5  
6  
7 13 Porapakkham Y, Rao C, Pattaraarchachai J, et al. Estimated causes of death in Thailand,  
8 2005: implications for health policy. *Population Health Metrics*. 2010; 8(1): 14.  
9  
10  
11 14 Beaglehole R, Bonita R, Horton R, et al. Priority actions for the non-communicable  
12 disease crisis. *Lancet*. 2011; 377(9775): 1438-1447.  
13  
14 15 IMS Health MIDAS. 1998-2006.  
15  
16 16 European Pharmaceutical Market Research Association (EphMRA). Anatomical  
17 Classification [Internet]. 2012 [cited 2012 Feb 6]. Available from:  
18 <http://www.ephmra.org/classification/anatomical-classification.aspx>  
19  
20  
21 17 The World Bank. Data [Internet]. 2011 [cited 2011 May13]. Available from:  
22 <http://data.worldbank.org/>  
23  
24 18 Wagner AK, Soumerai SB, Zhang F, Ross-Degnan D. Segmented regression analysis of  
25 interrupted time series studies in medication use research. *J Clin Pharm Ther*. 2002;  
26 27(4): 299-309.  
27  
28  
29 19 Shadish WR, Cook TD, Campbell DT. Experimental and quasi-experimental designs for  
30 generalized causal inference. Boston: Houghton Mifflin Company; 2002.  
31  
32  
33 20 Zhang F, Wagner AK, Soumerai SB, Ross-Degnan D. Methods for estimating confidence  
34 intervals in interrupted time series analyses of health interventions. *J Clin Epidemiol*.  
35 2009; 62(2): 143-148.  
36  
37  
38 21 United States. Food and Drug Agency. Recall of Interferon alfa-2b, (Recombinant),  
39 Powder for Injection, Intron A - (Schering Corporation) [Internet]. 2001 Oct 22 [cited 13  
40 Oct 2011]. Available from:  
41 <http://www.fda.gov/Drugs/DevelopmentApprovalProcess/HowDrugsareDevelopedandApproved/ApprovalApplications/TherapeuticBiologicApplications/ucm113617.htm>  
42  
43  
44 22 Yiengprugsawan V, Carmichael G, Lim L, Seubsman S, Sleigh A. Explanation of  
45 inequality in utilization of ambulatory care before and after universal health insurance in  
46 Thailand. *Health Policy Plan*. 2011; 26(2): 105-14.  
47  
48  
49 23 Ratanawijitrasin S. Pharmaceutical policy in Thailand: a review of three decades of  
50 government interventions. In: Eggleston K, editor. Prescribing cultures and  
51 pharmaceutical policy in the Asia Pacific. Stanford: The Walter H. Shorenstein Asia-  
52 Pacific Research Center Books; 2009. p. 79–106.  
53  
54  
55 24 Ten Kate D. Safe at any costs? Asia Sentinel (Hong Kong) [Internet]. 2001 Jan 4 [cited  
56 2012 Feb 6]. Available from:  
57  
58  
59  
60



- 1  
2  
3  
4  
5  
6  
7  
8  
9  
10  
11  
12  
13  
14  
15  
16  
17  
18  
19  
20  
21  
22  
23  
24  
25  
26  
27  
28  
29  
30  
31  
32  
33  
34  
35  
36  
37  
38  
39  
40  
41  
42  
43  
44  
45  
46  
47  
48  
49  
50  
51  
52  
53  
54  
55  
56  
57  
58  
59  
60
- [http://www.asiasentinel.com/index.php?option=com\\_content&task=view&id=351&Itemid=392](http://www.asiasentinel.com/index.php?option=com_content&task=view&id=351&Itemid=392)
- 25 Bates, R. Local pharmaceutical production in developing countries: How economic protectionism undermines access to quality medicines. Campaign for Fighting Diseases discussion paper no. 1 [Internet]. 2008 Jan [cited Feb 7 2012]. Available from: [http://www.policynetwork.net/sites/default/files/local\\_drug\\_production.pdf](http://www.policynetwork.net/sites/default/files/local_drug_production.pdf) .
- 26 Tangcharoensathien V, Jongudomsuk P. From policy to implementation: Historical events during 2001-2011 of universal coverage in Thailand. Bangkok, Thailand: National Health Security Office; 2012.
- 27 Hirunrassamee S, Ratanawijitrasin S. Does your health care depend on how your insurer pays providers? Variation in utilization and outcomes in Thailand. *Int J Health Care Finance Econ*. 2009; 9(2): 153-168.
- 28 IMS Health. IMS Thailand Market Prognosis. 2012.
- 29 IMS Health. Pharma Pricing and Reimbursement. 2011 Mar; 16(3).
- 30 Khanna R. Universal Health Coverage in Thailand: What Lessons Can India Learn? [Internet]. 2010 Dec 16 [cited 2012 Feb 7]. Available from: <http://www.mfcindia.org/main/bgpapers/bgpapers2011/am/bgap2011r.pdf>
- 31 Treerutkuarkul A. Thailand: health care for all, at a price. *Bull World Health Organ*. 2010; 88(2): 84-5.
- 32 Pitayarangsarit S. The Introduction of the Universal Coverage of Health Care Policy in Thailand: Policy Responses [PhD thesis]. London, UK: London School of Hygiene and Tropical Medicine; 2004 [cited 2012 Feb 7]. Available from: [http://www.nhso.go.th/eng/download/The%20Introduction%20of%20the%20Universal%20Coverage%20of%20Health%20Care%20Policy%20in%20Thailand\\_%20Policy%20Responses.pdf](http://www.nhso.go.th/eng/download/The%20Introduction%20of%20the%20Universal%20Coverage%20of%20Health%20Care%20Policy%20in%20Thailand_%20Policy%20Responses.pdf)

## TABLES

**Table 1. Summary of the Impact of the Universal Coverage Scheme on Volume in the Hospital Sector (from segmented regression results) \***

| Therapeutic Area              | Pre-policy trend | Immediate change after policy | Post-policy trend change |
|-------------------------------|------------------|-------------------------------|--------------------------|
| <b>DIABETES</b>               |                  |                               |                          |
| Antidiabetics**               | ↑                |                               | ↑                        |
| Insulins**                    | ↑                | ↑                             | ↑                        |
| <b>CARDIOVASCULAR DISEASE</b> |                  |                               |                          |
| Antihypertensives             | ↑                | ↓                             | ↑                        |
| Lipid Regulating Agents**     | ↑                |                               | ↑                        |
| Cardiac Therapy               | ↑                | ↓                             |                          |
| <b>CANCER</b>                 |                  |                               |                          |
| Antineoplastics               | ↑                |                               |                          |
| Cytostatic Hormones           | ↑                |                               | ↑                        |
| Immunostimulating Agents**    | ↑                | ↓                             |                          |

\*Arrows signify a statistically significant coefficient ( $p < 0.05$ ) from segmented regression with linear post-policy trend term, unless noted otherwise.

\*\*Quadratic model (which has a squared post-policy trend term) fits better than linear model.

Note: See online appendix Table 2 and Figures 1-8 for regression coefficients and figures for all therapeutic areas.

**Table 2. Relative Impact of UCS on Sales of Medicines by Class (one and five years post policy)\***

| Therapeutic Class        | One Year Impact (in standard units) |          |                              | Five Year Impact (in standard units) |          |                              |
|--------------------------|-------------------------------------|----------|------------------------------|--------------------------------------|----------|------------------------------|
|                          | Predicted                           | Observed | Relative Change (95% CI)     | Predicted                            | Observed | Relative Change (95% CI)     |
| Antidiabetics            | 2602.91                             | 2769.79  | 6.4% (-6.9, 19.7)            | 3669.13                              | 5090.62  | <b>38.7% (13.5, 64.0)</b>    |
| Insulins                 | 3.30                                | 4.45     | <b>34.8% (15.1, 54.5)</b>    | 4.58                                 | 12.56    | <b>174.4% (113.9, 235.0)</b> |
| Cardiac Therapy Agents   | 699.28                              | 607.27   | -13.2% (-26.9, 0.6)          | 908.12                               | 825.49   | -9.1% (-31.9, 13.1)          |
| Lipid Regulating Agents  | 522.34                              | 504.58   | -3.4% (-19.9, 13.1)          | 781.97                               | 1629.11  | <b>108.3% (59.8, 156.9)</b>  |
| Antihypertensives        | 3521.47                             | 3418.79  | -2.9% (-15.5, 9.7)           | 5200.86                              | 6177.49  | 18.8% (-2.8, 40.3)**         |
| Antineoplastics          | 35.38                               | 34.21    | -3.3% (-15.4, 8.7)           | 46.14                                | 48.13    | 4.3% (-16.3, 24.9)           |
| Cytostatic Hormones      | 29.48                               | 30.58    | 3.7% (-10.1, 17.6)           | 39.82                                | 47.52    | 19.3% (-5.1, 43.8)           |
| Immunostimulating Agents | 0.65                                | 0.43     | <b>-35.0% (-45.1, -25.0)</b> | 0.81                                 | 0.60     | <b>-26.3% (-45.0, -7.6)</b>  |

\***Bold** signifies that the change is statistically significant (i.e., confidence interval does not include the null value of 0).

\*\* The *absolute* five-year difference, which is estimated using more precise method, is significant. See online appendix Table 4.

Table 3. Immediate Impact of UCS on Hospital Sector Market Share\*

| Therapeutic Area                | Licensing Status   | Immediate post-policy absolute change in % market share (95% CI) |
|---------------------------------|--------------------|------------------------------------------------------------------|
| <b>DIABETES</b>                 |                    |                                                                  |
| <b>Antidiabetics</b>            | Originator brand   | -0.3% (-1.6, 1.0)                                                |
|                                 | Branded generic    | <b>-12.3% (-16.0, -8.7)</b>                                      |
|                                 | Generic            | <b>-3.5% (-5.8, -1.1)</b>                                        |
|                                 | GPO                | <b>16.1% (12.0, 20.2)</b>                                        |
| <b>Insulins***</b>              | Originator brand** | -0.04% (-0.4, 0.3)                                               |
|                                 | Branded generic    | <b>7.0% (2.9, 11.1)</b>                                          |
|                                 | Generic            | <b>-6.2% (-10.3, -2.1)</b>                                       |
| <b>CARDIOVASCULAR DISEASE</b>   |                    |                                                                  |
| <b>Antihypertensives</b>        | Originator brand** | -0.1% (-2.3, 2.0)                                                |
|                                 | Branded generic**  | -0.2% (-6.1, 1.8)                                                |
|                                 | Generic            | <b>-5.7% (-8.3, -3.0)</b>                                        |
|                                 | GPO                | 5.3% (-0.1, 10.6)                                                |
| <b>Lipid Regulating Agents</b>  | Originator brand** | <b>-7.8% (-10.2, -5.4)</b>                                       |
|                                 | Branded generic**  | <b>7.6% (5.1, 10.0)</b>                                          |
|                                 | Generic            | 0.2% (-0.4, 0.7)                                                 |
|                                 | GPO                | 0.2% (-0.3, 0.8)                                                 |
| <b>Cardiac Therapy</b>          | Originator brand   | 0.1% (-0.8, 1.0)                                                 |
|                                 | Branded generic**  | <b>-13.5% (-20.5, -6.5)</b>                                      |
|                                 | Generic            | <b>-4.3% (-6.2, -2.4)</b>                                        |
|                                 | GPO                | <b>21.6% (15.0, 28.1)</b>                                        |
| <b>CANCER***</b>                |                    |                                                                  |
| <b>Antineoplastics</b>          | Originator brand   | 1.1% (-1.0, 3.2)                                                 |
|                                 | Branded generic    | -1.0% (-5.4, 3.4)                                                |
|                                 | Generic            | 0.4% (-2.7, 3.4)                                                 |
| <b>Cytostatic Hormones</b>      | Originator brand** | 0.4% (-5.4, 6.1)                                                 |
|                                 | Branded generic**  | <b>-7.7% (-12.0, -3.5)</b>                                       |
|                                 | Generic**          | <b>6.0% (1.4, 10.6)</b>                                          |
| <b>Immunostimulating Agents</b> | Originator brand   | <b>-6.4% (-9.7, -3.0)</b>                                        |
|                                 | Branded generic    | <b>4.5% (1.7, 7.3)</b>                                           |
|                                 | Generic            | -0.2% (-0.3, 0.02)                                               |

\***Bold** signifies a statistically significant regression coefficient ( $p < 0.05$ ). Changes are in absolute terms (i.e., percentage point change).

\*\*Quadratic model (which has a squared post-policy term) fits better than linear model.

\*\*\*GPO did not produce any insulins or cancer medicines during the study period.

Note 1: See online appendix Table 5 and Figures 9-16 for market share regression coefficients and figures for all therapeutic areas

Note 2: Aside from the immediate level changes following the policy, there were few major changes in market share. See online appendix, Table 6 for absolute one- and five-year differences.

1  
2  
3 **Figure Index (attached in separate document):\***

4 **Figure 1.** Standard Units Per Capita by Quarter: Insulin (Hospital vs. Retail)

6  
7 **Figure 2.** Standard Units Per Capita by Quarter: Antihypertensives (Hospital vs. Retail)

8  
9 **Figure 3.** Licensing Status Market Share by Quarter: Antidiabetics (Hospital Sector)

10  
11 **Figure 4.** Licensing Status Market Share by Quarter: Cardiac Therapy Products (Hospital  
12 Sector)

13  
14  
15 \*The grey box in each figure represents the 3-quarter UCS roll-out period.

16  
17 **Online appendix (attached in separate document)**

**Figure 1. Total Volume (Standard Units Per Capita) by Quarter for Insulin (Hospital vs. Retail Pharmacies)**

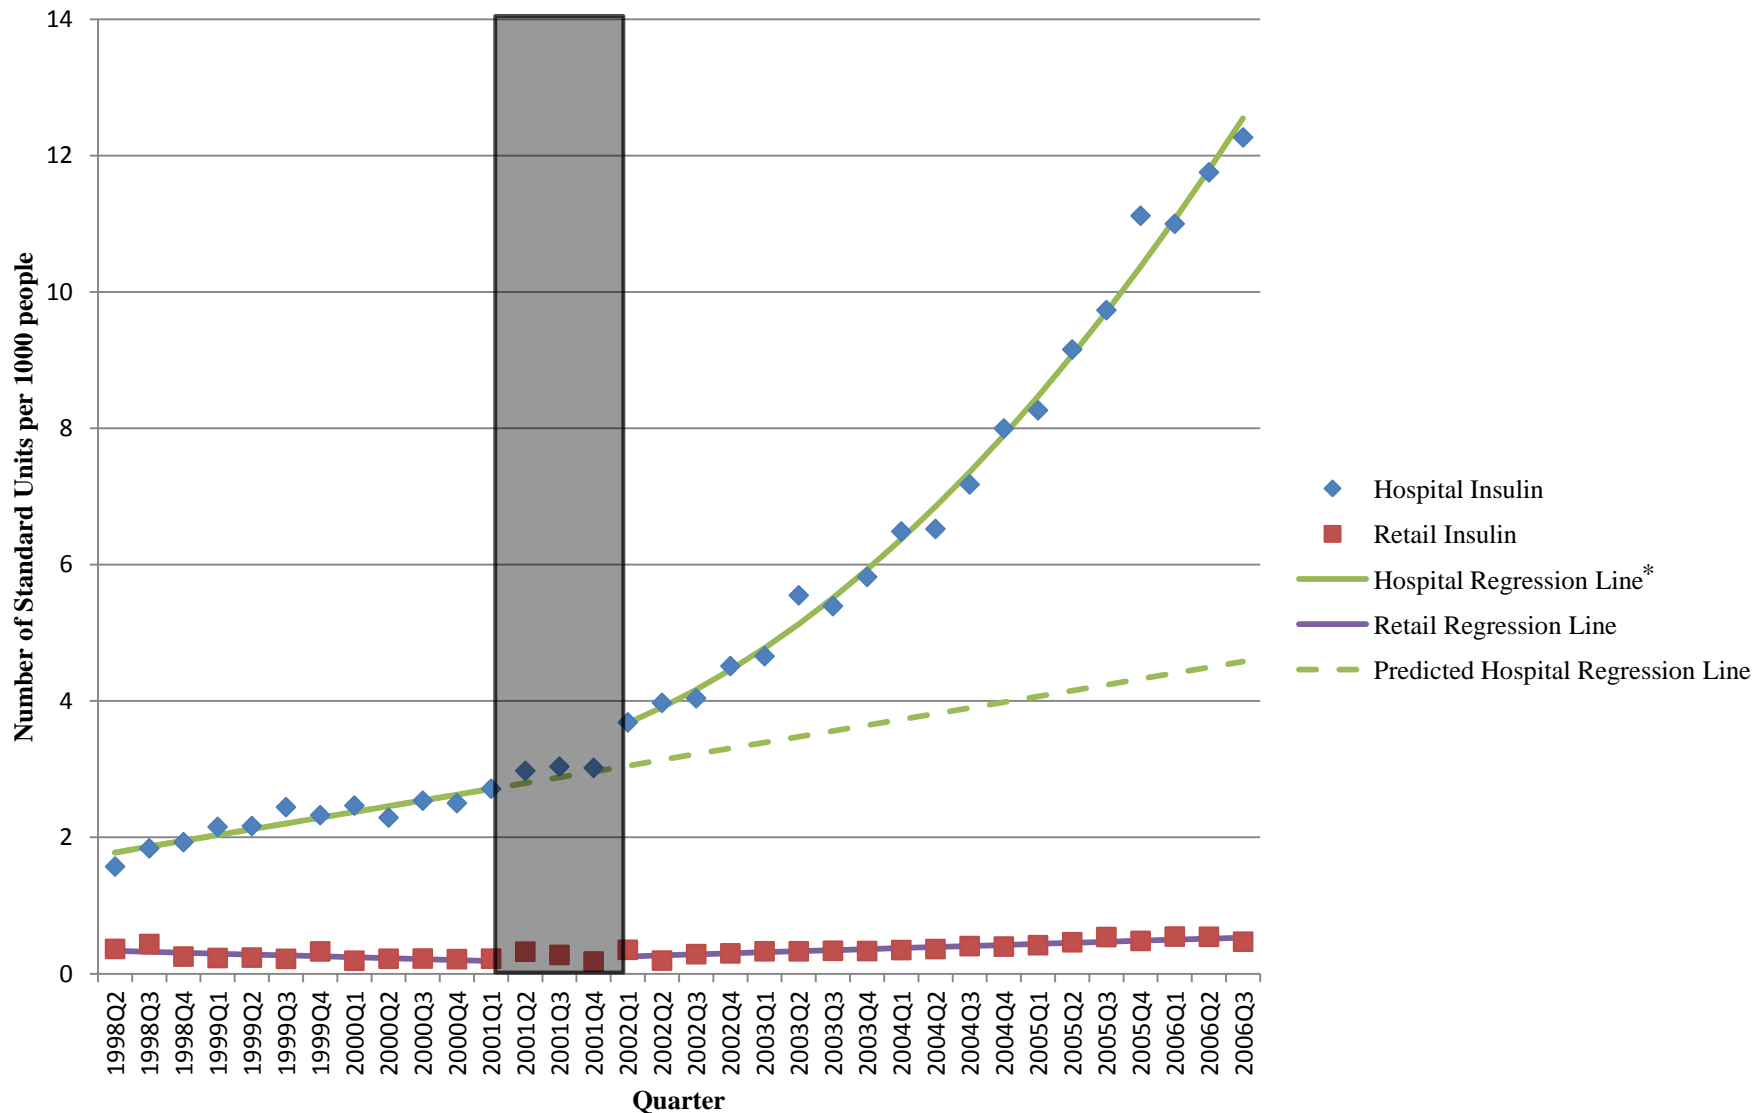

\*Results from quadratic model

Figure 2. Total Volume (Standard Units Per Capita) by Quarter for Antihypertensives (Hospital vs. Retail Pharmacies)

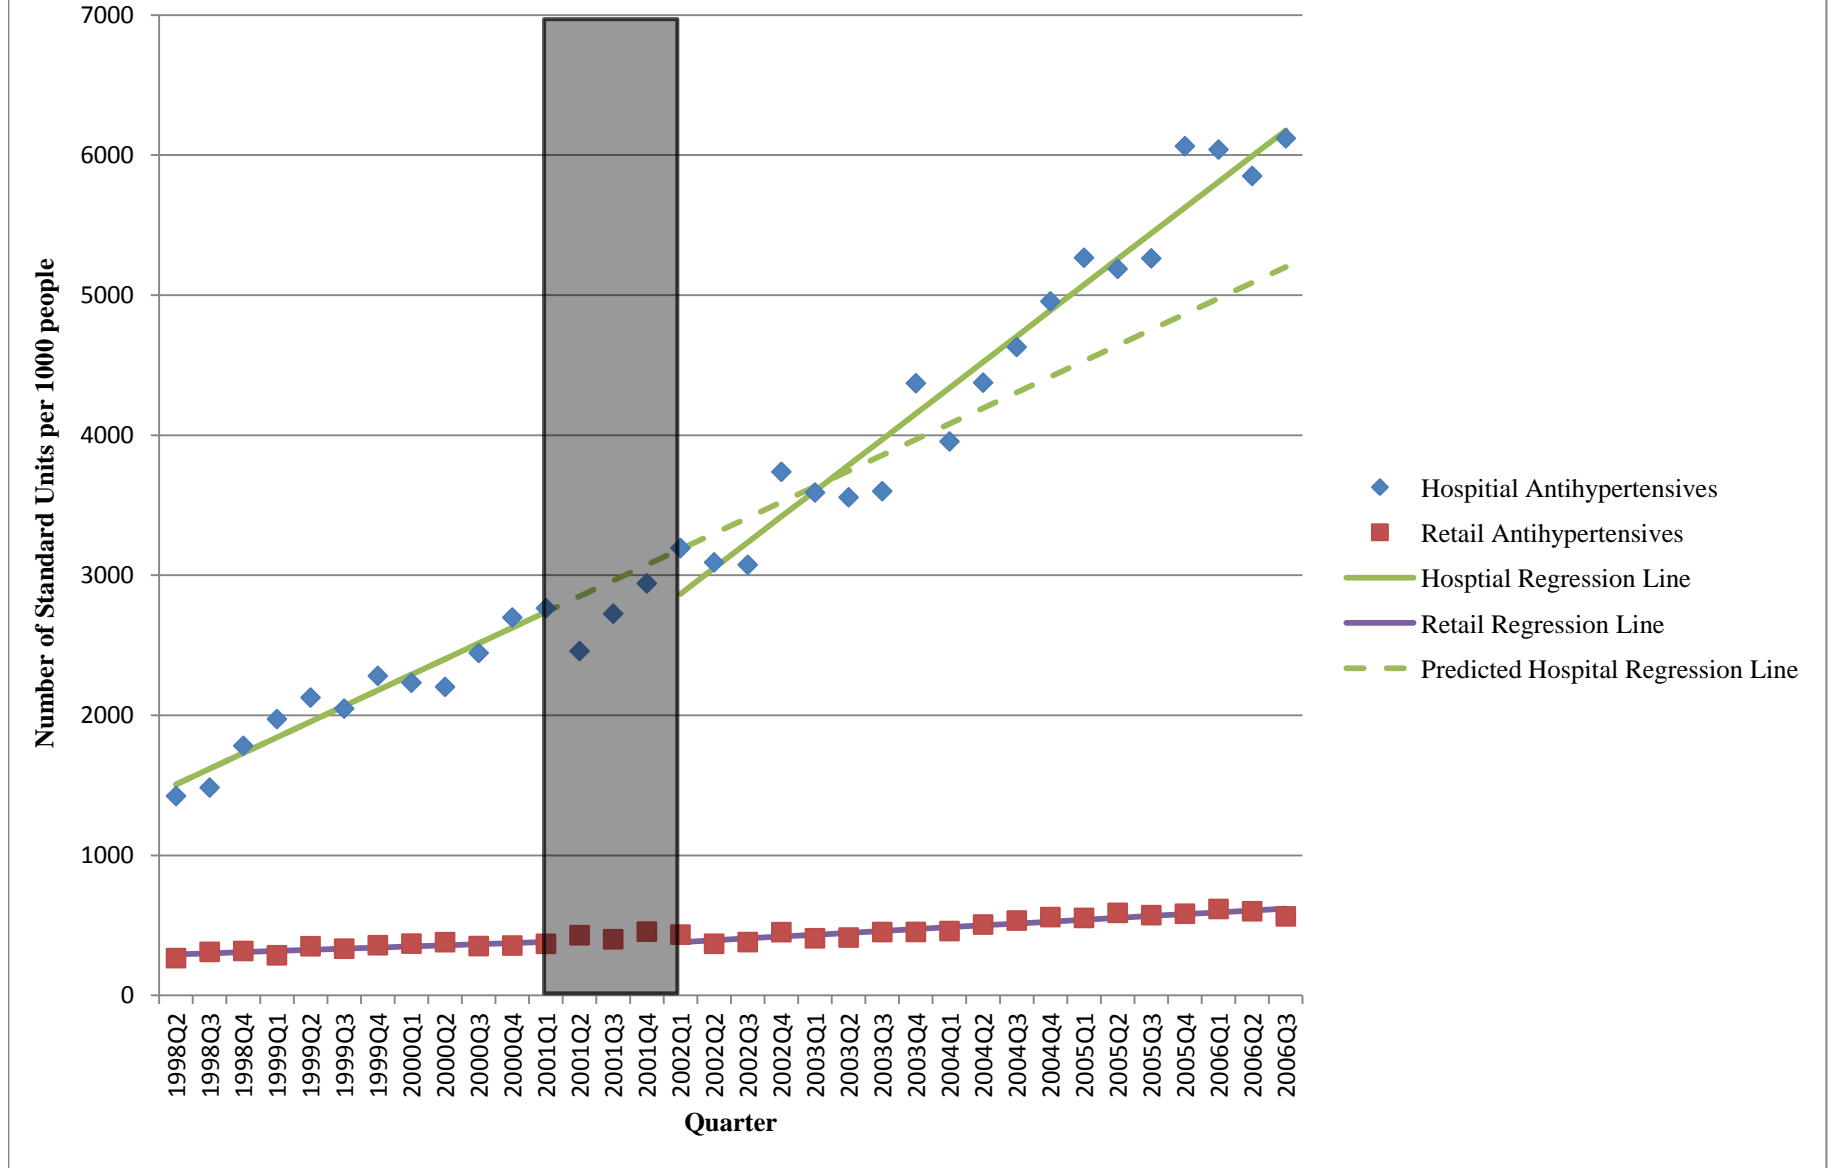

**Figure 3. Licensing Status Market Share by Quarter for Antidiabetics (Hospital Pharmacies)**

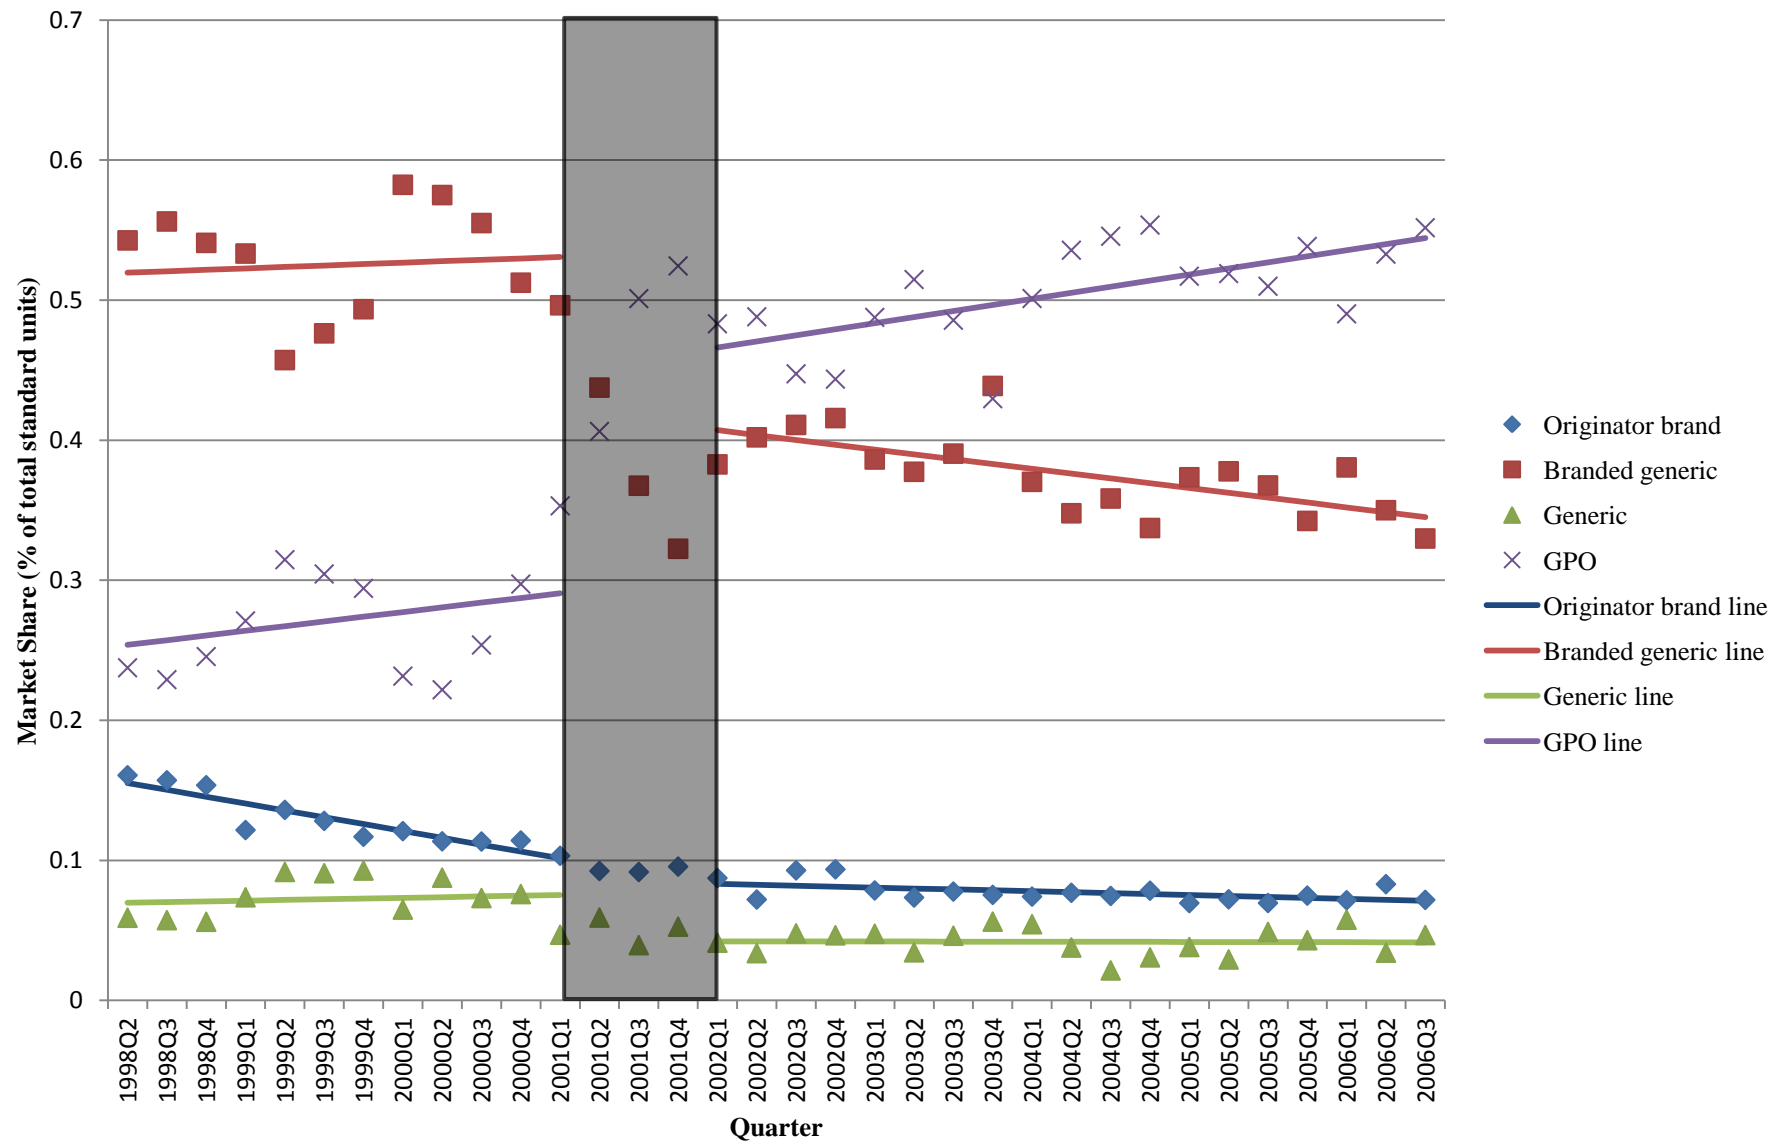

Figure 4. Licensing Status Market Share by Quarter for Cardiac Therapy Agents (Hospital Pharmacies)

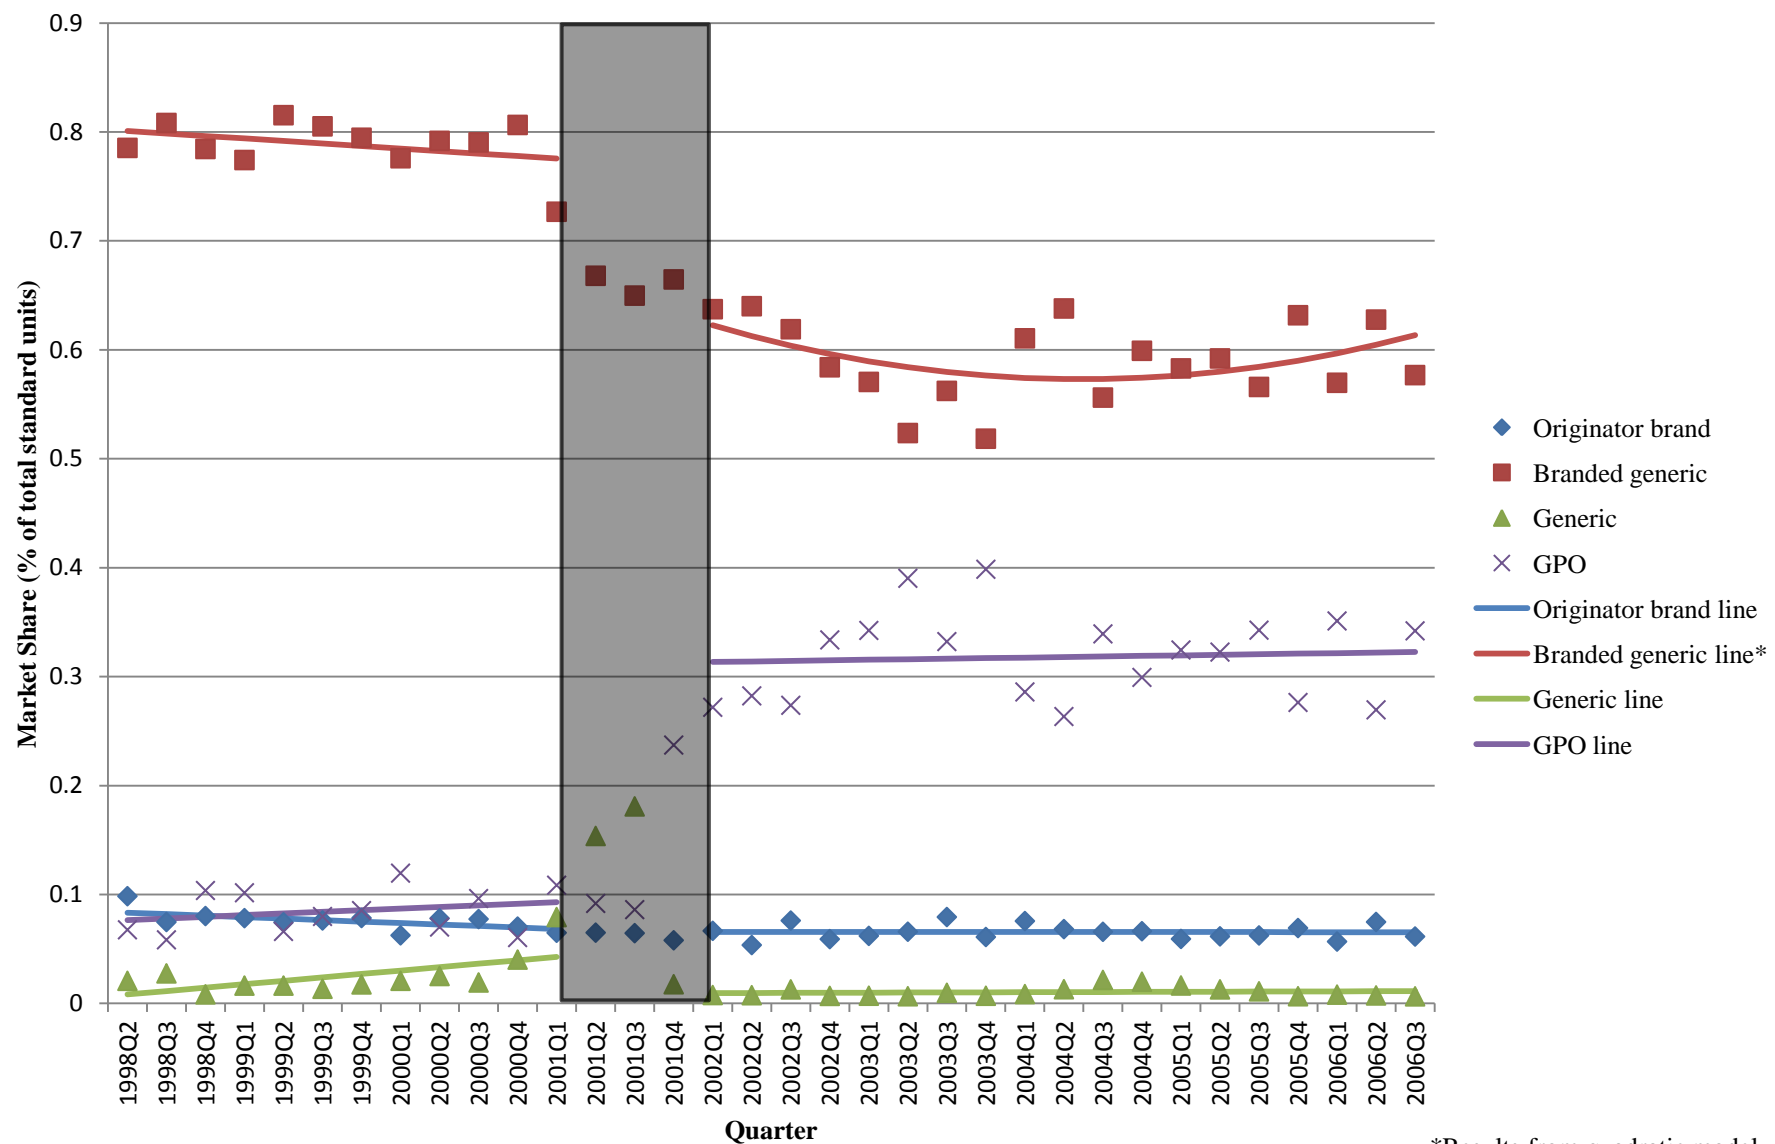

\*Results from quadratic model



Appendix Table 1. List of Medicines by ATC

| Therapeutic Area             | Classification for Analysis | Molecule Name                                       | ATC2 Classification          | ATC4 Classification              | NLEM (1=on NLEM 1999-2004) | Note regarding NLEM                                           |
|------------------------------|-----------------------------|-----------------------------------------------------|------------------------------|----------------------------------|----------------------------|---------------------------------------------------------------|
| <b>DIABETES</b>              |                             |                                                     |                              |                                  |                            |                                                               |
|                              | Antidiabetics               | ACARBOSE                                            | A10 (DRUGS USED IN DIABETES) | A10L0 (A-GLUCOSIDASE INH A-DIAB) | 1                          |                                                               |
|                              | Antidiabetics               | BUFORMIN                                            | A10 (DRUGS USED IN DIABETES) | A10J1 (BIGUANIDE A-DIABS PLAIN)  | 0                          |                                                               |
|                              | Antidiabetics               | CHLORPROPAMIDE                                      | A10 (DRUGS USED IN DIABETES) | A10H0 (SULPHONYLUREA A-DIABS)    | 1                          |                                                               |
|                              | Antidiabetics               | EXENATIDE                                           | A10 (DRUGS USED IN DIABETES) | A10S0 (GLP-1 AGONIST A-DIABS)    | 0                          |                                                               |
|                              | Antidiabetics               | GLIBENCLAMIDE                                       | A10 (DRUGS USED IN DIABETES) | A10H0 (SULPHONYLUREA A-DIABS )   | 1                          |                                                               |
|                              | Antidiabetics               | GLIBENCLAMIDE#METFORMIN                             | A10 (DRUGS USED IN DIABETES) | A10J2 (BIGUANIDE & S-UREA COMBS) | 0                          | both ingredients listed separately, not in combo              |
|                              | Antidiabetics               | GLICLAZIDE                                          | A10 (DRUGS USED IN DIABETES) | A10H0 (SULPHONYLUREA A-DIABS)    | 1                          |                                                               |
|                              | Antidiabetics               | GLICLAZIDE#METFORMIN                                | A10 (DRUGS USED IN DIABETES) | A10J2 (BIGUANIDE & S-UREA COMBS) | 0                          | both ingredients listed separately, not in combo              |
|                              | Antidiabetics               | GLIMEPIRIDE                                         | A10 (DRUGS USED IN DIABETES) | A10H0 (SULPHONYLUREA A-DIABS)    | 0                          |                                                               |
|                              | Antidiabetics               | GLIMEPIRIDE#METFORMIN                               | A10 (DRUGS USED IN DIABETES) | A10J2 (BIGUANIDE & S-UREA COMBS) | 0                          |                                                               |
|                              | Antidiabetics               | GLIMEPIRIDE#ROSIGLITAZONE                           | A10 (DRUGS USED IN DIABETES) | A10K2 (GLITAZONE & S-UREA COMBS) | 0                          |                                                               |
|                              | Antidiabetics               | GLIPIZIDE                                           | A10 (DRUGS USED IN DIABETES) | A10H0 (SULPHONYLUREA A-DIABS)    | 1                          |                                                               |
|                              | Antidiabetics               | GLIQUIDONE                                          | A10 (DRUGS USED IN DIABETES) | A10H0 (SULPHONYLUREA A-DIABS)    | 0                          |                                                               |
|                              | Antidiabetics               | METFORMIN                                           | A10 (DRUGS USED IN DIABETES) | A10J1 (BIGUANIDE A-DIABS PLAIN)  | 1                          |                                                               |
|                              | Antidiabetics               | METFORMIN#PIOGLITAZONE                              | A10 (DRUGS USED IN DIABETES) | A10K3 (GLITAZONE & BIGUAN COMBS) | 0                          |                                                               |
|                              | Antidiabetics               | METFORMIN#ROSIGLITAZONE                             | A10 (DRUGS USED IN DIABETES) | A10K3 (GLITAZONE & BIGUAN COMBS) | 0                          |                                                               |
|                              | Antidiabetics               | METFORMIN#SITAGLIPTIN                               | A10 (DRUGS USED IN DIABETES) | A10N3 (DPP-IV INH & BIGUAN COMB) | 0                          |                                                               |
|                              | Antidiabetics               | METFORMIN#VILDAGLIPTIN                              | A10 (DRUGS USED IN DIABETES) | A10N3 (DPP-IV INH & BIGUAN COMB) | 0                          |                                                               |
|                              | Antidiabetics               | PIOGLITAZONE                                        | A10 (DRUGS USED IN DIABETES) | A10K1 (GLITAZONE A-DIABS PLAIN)  | 0                          |                                                               |
|                              | Antidiabetics               | REPAGLINIDE                                         | A10 (DRUGS USED IN DIABETES) | A10M1 (GLINIDE A-DIABS PLAIN)    | 0                          |                                                               |
|                              | Antidiabetics               | ROSIGLITAZONE                                       | A10 (DRUGS USED IN DIABETES) | A10K1 (GLITAZONE A-DIABS PLAIN)  | 0                          |                                                               |
|                              | Antidiabetics               | SITAGLIPTIN                                         | A10 (DRUGS USED IN DIABETES) | A10N1 (DPP-IV INH A-DIAB PLAIN)  | 0                          |                                                               |
|                              | Antidiabetics               | VILDAGLIPTIN                                        | A10 (DRUGS USED IN DIABETES) | A10N1 (DPP-IV INH A-DIAB PLAIN)  | 0                          |                                                               |
|                              | Antidiabetics               | VOGLIBOSE                                           | A10 (DRUGS USED IN DIABETES) | A10L0 (A-GLUCOSIDASE INH A-DIAB) | 0                          |                                                               |
|                              | Insulins                    | INSULIN ASPART                                      | A10 (DRUGS USED IN DIABETES) | A10C1 (H INSUL+ANG FAST ACT)     | 1                          | according to personal communication, all insulins are on NLEM |
|                              | Insulins                    | INSULIN ASPART#INSULIN ASPART PROTAMINE CRYSTALLINE | A10 (DRUGS USED IN DIABETES) | A10C3 (H INSUL+ANG INT+FAST ACT) | 1                          | according to personal communication, all insulins are on NLEM |
|                              | Insulins                    | INSULIN DETEMIR                                     | A10 (DRUGS USED IN DIABETES) | A10C5 (H INSUL+ANG LONG ACT)     | 1                          | according to personal communication, all insulins are on NLEM |
|                              | Insulins                    | INSULIN GLARGINE                                    | A10 (DRUGS USED IN DIABETES) | A10C5 (H INSUL+ANG LONG ACT)     | 1                          | according to personal communication, all insulins are on NLEM |
|                              | Insulins                    | INSULIN HUMAN BASE                                  | A10 (DRUGS USED IN DIABETES) | A10C1 (H INSUL+ANG FAST ACT)     | 1                          | according to personal communication, all insulins are on NLEM |
|                              | Insulins                    | INSULIN HUMAN BASE#INSULIN HUMAN ISOPHANE           | A10 (DRUGS USED IN DIABETES) | A10C3 (H INSUL+ANG INT+FAST ACT) | 1                          | according to personal communication, all insulins are on NLEM |
|                              | Insulins                    | INSULIN HUMAN ISOPHANE                              | A10 (DRUGS USED IN DIABETES) | A10C2 (H INSUL+ANG INTERMED ACT) | 1                          | according to personal communication, all insulins are on NLEM |
|                              | Insulins                    | INSULIN HUMAN ZINC SUSPENSION (COMPOUND)            | A10 (DRUGS USED IN DIABETES) | A10C4 (H INSUL+ANG INT+LONG ACT) | 1                          | according to personal communication, all insulins are on NLEM |
|                              | Insulins                    | INSULIN HUMAN ZINC SUSPENSION (CRYSTALLINE)         | A10 (DRUGS USED IN DIABETES) | A10C5 (H INSUL+ANG LONG ACT)     | 1                          | according to personal communication, all insulins are on NLEM |
|                              | Insulins                    | INSULIN LISPRO                                      | A10 (DRUGS USED IN DIABETES) | A10C1 (H INSUL+ANG FAST ACT)     | 1                          | according to personal communication, all insulins are on NLEM |
|                              | Insulins                    | INSULIN LISPRO#INSULIN LISPRO PROTAMINE             | A10 (DRUGS USED IN DIABETES) | A10C1 (H INSUL+ANG FAST ACT )    | 1                          | according to personal communication, all insulins are on NLEM |
|                              | Insulins                    | INSULIN PORCINE BASE                                | A10 (DRUGS USED IN DIABETES) | A10D0 (ANIMAL INSULINS)          | 1                          | according to personal communication, all insulins are on NLEM |
|                              | Insulins                    | INSULIN PORCINE ISOPHANE                            | A10 (DRUGS USED IN DIABETES) | A10D0 (ANIMAL INSULINS)          | 1                          | according to personal communication, all insulins are on NLEM |
|                              | Insulins                    | INSULIN PORCINE ZINC SUSPENSION (COMPOUND)          | A10 (DRUGS USED IN DIABETES) | A10D0 (ANIMAL INSULINS )         | 1                          | according to personal communication, all insulins are on NLEM |
| <b>CARIOVASCULAR DISEASE</b> |                             |                                                     |                              |                                  |                            |                                                               |
|                              | Antihypertensives           | AJMALICINE#BUTIZIDE#RESCINNAMINE#RESERPINE          | C2 (ANTIHYPERTENSIVES)       | C2D0 (RAUWOLF ALK+OTH COM+DIUR)  | 0                          |                                                               |
|                              | Antihypertensives           | BUNAZOSIN                                           | C2 (ANTIHYPERTENSIVES)       | C2A2 (ANTIHYPERT.PL MAINLY PERI) | 0                          |                                                               |
|                              | Antihypertensives           | CLONIDINE                                           | C2 (ANTIHYPERTENSIVES)       | C2A1 (ANTIHYPERT.PL MAINLY CENT) | 1                          |                                                               |
|                              | Antihypertensives           | CLOPAMIDE#DIHYDROERGOCRISTINE#RESERPINE             | C2 (ANTIHYPERTENSIVES)       | C2D0 (RAUWOLF ALK+OTH COM+DIUR)  | 0                          |                                                               |
|                              | Antihypertensives           | CLOPAMIDE#RESERPINE                                 | C2 (ANTIHYPERTENSIVES)       | C2D0 (RAUWOLF ALK+OTH COM+DIUR)  | 0                          |                                                               |
|                              | Antihypertensives           | DHYDRALAZINE                                        | C2 (ANTIHYPERTENSIVES)       | C2A2 (ANTIHYPERT.PL MAINLY PERI) | 1                          |                                                               |
|                              | Antihypertensives           | DOXAZOSIN                                           | C2 (ANTIHYPERTENSIVES)       | C2A2 (ANTIHYPERT.PL MAINLY PERI) | 1                          |                                                               |
|                              | Antihypertensives           | HYDRALAZINE                                         | C2 (ANTIHYPERTENSIVES)       | C2A2 (ANTIHYPERT.PL MAINLY PERI) | 1                          |                                                               |
|                              | Antihypertensives           | HYDRALAZINE#HYDROCHLOROTHIAZIDE#RESERPINE           | C2 (ANTIHYPERTENSIVES)       | C2B2 (A-HYPERT(N V)MAINLY PERI)  | 0                          | all ingredients listed separately, not in combo               |
|                              | Antihypertensives           | KETANSERIN                                          | C2 (ANTIHYPERTENSIVES)       | C2A2 (ANTIHYPERT.PL MAINLY PERI) | 0                          |                                                               |
|                              | Antihypertensives           | METHYLDOPA                                          | C2 (ANTIHYPERTENSIVES)       | C2A1 (ANTIHYPERT.PL MAINLY CENT) | 1                          |                                                               |
|                              | Antihypertensives           | MINOXIDIL                                           | C2 (ANTIHYPERTENSIVES)       | C2A2 (ANTIHYPERT.PL MAINLY PERI) | 1                          |                                                               |
|                              | Antihypertensives           | NITROPRUSSIDE                                       | C2 (ANTIHYPERTENSIVES)       | C2A2 (ANTIHYPERT.PL MAINLY PERI) | 1                          |                                                               |
|                              | Antihypertensives           | PRAZOSIN                                            | C2 (ANTIHYPERTENSIVES)       | C2A2 (ANTIHYPERT.PL MAINLY PERI) | 1                          |                                                               |
|                              | Antihypertensives           | RESERPINE                                           | C2 (ANTIHYPERTENSIVES)       | C2C0 (RAUWOLF ALK+OTH A-HY HERB) | 1                          |                                                               |
|                              | Antihypertensives           | RILMENIDINE                                         | C2 (ANTIHYPERTENSIVES)       | C2A1 (ANTIHYPERT.PL MAINLY CENT) | 0                          |                                                               |
|                              | Antihypertensives           | 1-PROPANOL                                          | C7 (BETA BLOCKING AGENTS)    | C7A0 (B-BLOCKING AGENTS.PLAIN)   | 0                          |                                                               |
|                              | Antihypertensives           | AMILORIDE#HYDROCHLOROTHIAZIDE#TIMOLOL               | C7 (BETA BLOCKING AGENTS)    | C7B1 (B-BLOCK COMB HYPOT/DIURT)  | 1                          |                                                               |
|                              | Antihypertensives           | ATENLOLOL                                           | C7 (BETA BLOCKING AGENTS)    | C7A0 (B-BLOCKING AGENTS.PLAIN)   | 1                          |                                                               |
|                              | Antihypertensives           | ATENLOLOL#CHLORTALIDONE                             | C7 (BETA BLOCKING AGENTS)    | C7B1 (B-BLOCK COMB HYPOT/DIURT)  | 0                          |                                                               |
|                              | Antihypertensives           | BETAXOLOL                                           | C7 (BETA BLOCKING AGENTS)    | C7A0 (B-BLOCKING AGENTS.PLAIN)   | 1                          |                                                               |
|                              | Antihypertensives           | BISOPROLOL                                          | C7 (BETA BLOCKING AGENTS)    | C7A0 (B-BLOCKING AGENTS.PLAIN)   | 0                          |                                                               |
|                              | Antihypertensives           | BISOPROLOL#HYDROCHLOROTHIAZIDE                      | C7 (BETA BLOCKING AGENTS)    | C7B1 (B-BLOCK COMB HYPOT/DIURT)  | 0                          |                                                               |
|                              | Antihypertensives           | CARVEDILOL                                          | C7 (BETA BLOCKING AGENTS)    | C7A0 (B-BLOCKING AGENTS.PLAIN)   | 0                          |                                                               |

|    |                   |                                                       |                               |                                 |   |
|----|-------------------|-------------------------------------------------------|-------------------------------|---------------------------------|---|
| 1  | Antihypertensives | CLOPAMIDE#PINDOLOL                                    | C7 (BETA BLOCKING AGENTS)     | C7B1 (B-BLOCK COMB HYPOT/DIURT) | 0 |
|    | Antihypertensives | LABETALOL                                             | C7 (BETA BLOCKING AGENTS)     | C7A0 (B-BLOCKING AGENTS,PLAIN)  | 0 |
| 2  | Antihypertensives | METOPROLOL                                            | C7 (BETA BLOCKING AGENTS)     | C7A0 (B-BLOCKING AGENTS,PLAIN)  | 0 |
| 3  | Antihypertensives | NEBIVOLOL                                             | C7 (BETA BLOCKING AGENTS)     | C7A0 (B-BLOCKING AGENTS,PLAIN ) | 0 |
|    | Antihypertensives | OXPRENOLOL                                            | C7 (BETA BLOCKING AGENTS)     | C7A0 (B-BLOCKING AGENTS,PLAIN ) | 0 |
| 4  | Antihypertensives | PINDOLOL                                              | C7 (BETA BLOCKING AGENTS)     | C7A0 (B-BLOCKING AGENTS,PLAIN ) | 0 |
| 5  | Antihypertensives | PROPRANOLOL                                           | C7 (BETA BLOCKING AGENTS)     | C7A0 (B-BLOCKING AGENTS,PLAIN ) | 1 |
|    | Antihypertensives | SOTALOL                                               | C7 (BETA BLOCKING AGENTS)     | C7A0 (B-BLOCKING AGENTS,PLAIN ) | 0 |
| 6  | Antihypertensives | AMLODIPINE                                            | C8 (CALCIUM ANTAGONISTS)      | C8A0 (CALCIUM ANTAGONIST PLAIN) | 1 |
|    | Antihypertensives | ATENOLOL#NIFEDIPINE                                   | C8 (CALCIUM ANTAGONISTS)      | C8B2 (CALC ANTAG/B BLOCKR COMB) | 0 |
| 7  | Antihypertensives | BARNIDIPINE                                           | C8 (CALCIUM ANTAGONISTS)      | C8A0 (CALCIUM ANTAGONIST PLAIN) | 0 |
|    | Antihypertensives | DILTIAZEM                                             | C8 (CALCIUM ANTAGONISTS)      | C8A0 (CALCIUM ANTAGONIST PLAIN) | 1 |
| 8  | Antihypertensives | FELODIPINE                                            | C8 (CALCIUM ANTAGONISTS)      | C8A0 (CALCIUM ANTAGONIST PLAIN) | 1 |
| 9  | Antihypertensives | GALLOPAMIL                                            | C8 (CALCIUM ANTAGONISTS)      | C8A0 (CALCIUM ANTAGONIST PLAIN) | 0 |
| 10 | Antihypertensives | ISRADIPINE                                            | C8 (CALCIUM ANTAGONISTS)      | C8A0 (CALCIUM ANTAGONIST PLAIN) | 0 |
|    | Antihypertensives | LACIDIPINE                                            | C8 (CALCIUM ANTAGONISTS)      | C8A0 (CALCIUM ANTAGONIST PLAIN) | 0 |
| 11 | Antihypertensives | LERCANIDIPINE                                         | C8 (CALCIUM ANTAGONISTS)      | C8A0 (CALCIUM ANTAGONIST PLAIN) | 0 |
|    | Antihypertensives | MANIDIPINE                                            | C8 (CALCIUM ANTAGONISTS)      | C8A0 (CALCIUM ANTAGONIST PLAIN) | 0 |
| 12 | Antihypertensives | MIBEFRADIL                                            | C8 (CALCIUM ANTAGONISTS)      | C8A0 (CALCIUM ANTAGONIST PLAIN) | 0 |
| 13 | Antihypertensives | NICARDIPINE                                           | C8 (CALCIUM ANTAGONISTS)      | C8A0 (CALCIUM ANTAGONIST PLAIN) | 1 |
|    | Antihypertensives | NIFEDIPINE                                            | C8 (CALCIUM ANTAGONISTS)      | C8A0 (CALCIUM ANTAGONIST PLAIN) | 1 |
| 14 | Antihypertensives | NISOLDIPINE                                           | C8 (CALCIUM ANTAGONISTS)      | C8A0 (CALCIUM ANTAGONIST PLAIN) | 0 |
| 15 | Antihypertensives | NITRENDIPINE                                          | C8 (CALCIUM ANTAGONISTS)      | C8A0 (CALCIUM ANTAGONIST PLAIN) | 0 |
| 16 | Antihypertensives | VERAPAMIL                                             | C8 (CALCIUM ANTAGONISTS)      | C8A0 (CALCIUM ANTAGONIST PLAIN) | 1 |
|    | Antihypertensives | AMILORIDE                                             | C3 (DIURETICS)                | C3A1 (POT SPARING AGENTS PLAIN) | 0 |
| 17 | Antihypertensives | AMILORIDE#HYDROCHLOROTHIAZIDE                         | C3 (DIURETICS)                | C3A5 (POT SPARING+THIAZ COMBS ) | 1 |
| 18 | Antihypertensives | BAROSMA BETULINA#CAPSICUM#METHYLENE BLUE#URGINEA SCIL | C3 (DIURETICS)                | C3A6 (OTHER DIURETICS)          | 0 |
|    | Antihypertensives | BAROSMA BETULINA#HYOSCYAMUS ALBUS#POTASSIUM           | C3 (DIURETICS)                | C3A6 (OTHER DIURETICS)          | 0 |
| 19 | Antihypertensives | BENDROFLUMETHIAZIDE#POTASSIUM                         | C3 (DIURETICS)                | C3A3 (THIAZIDE+ANALOGUE PLAIN)  | 0 |
| 20 | Antihypertensives | BUMETANIDE                                            | C3 (DIURETICS)                | C3A2 (LOOP DIURETICS PLAIN)     | 0 |
| 21 | Antihypertensives | FUROSEMIDE                                            | C3 (DIURETICS)                | C3A2 (LOOP DIURETICS PLAIN)     | 1 |
|    | Antihypertensives | HYDROCHLOROTHIAZIDE                                   | C3 (DIURETICS)                | C3A3 (THIAZIDE+ANALOGUE PLAIN)  | 1 |
| 22 | Antihypertensives | HYDROCHLOROTHIAZIDE#TRIAMTERENE                       | C3 (DIURETICS)                | C3A5 (POT SPARING+THIAZ COMBS)  | 0 |
| 23 | Antihypertensives | INDAPAMIDE                                            | C3 (DIURETICS)                | C3A3 (THIAZIDE+ANALOGUE PLAIN)  | 0 |
|    | Antihypertensives | SPIRONOLACTONE                                        | C3 (DIURETICS)                | C3A1 (POT SPARING AGENTS PLAIN) | 1 |
| 24 | Antihypertensives | TORASEMIDE                                            | C3 (DIURETICS)                | C3A2 (LOOP DIURETICS PLAIN)     | 0 |
| 25 | Antihypertensives | TRIPAMIDE                                             | C3 (DIURETICS)                | C3A3 (THIAZIDE+ANALOGUE PLAIN)  | 0 |
|    | Antihypertensives | XIPAMIDE                                              | C3 (DIURETICS)                | C3A3 (THIAZIDE+ANALOGUE PLAIN)  | 0 |
| 26 | Antihypertensives | ALISKIREN                                             | C9 (RENIN-ANGIOTEN SYS AGENT) | C9X0 (OTH RENIN-ANGIOTEN AGENT) | 0 |
| 27 | Antihypertensives | ALISKIREN#HYDROCHLOROTHIAZIDE                         | C9 (RENIN-ANGIOTEN SYS AGENT) | C9X0 (OTH RENIN-ANGIOTEN AGENT) | 0 |
|    | Antihypertensives | AMLODIPINE#VALSARTAN                                  | C9 (RENIN-ANGIOTEN SYS AGENT) | C9D3 (AT2 ANTG COMB CALC ANTAG) | 0 |
| 28 | Antihypertensives | CANDESARTAN CILEXETIL                                 | C9 (RENIN-ANGIOTEN SYS AGENT) | C9C0 (ANGIOTEN-II ANTAG, PLAIN) | 0 |
|    | Antihypertensives | CANDESARTAN CILEXETIL#HYDROCHLOROTHIAZIDE             | C9 (RENIN-ANGIOTEN SYS AGENT) | C9D1 (AT2 ANTG COMB C2 &/O DIU) | 0 |
| 29 | Antihypertensives | CAPTOPRIL                                             | C9 (RENIN-ANGIOTEN SYS AGENT) | C9A0 (ACE INHIBITORS PLAIN)     | 1 |
| 30 | Antihypertensives | CILAZAPRIL                                            | C9 (RENIN-ANGIOTEN SYS AGENT) | C9A0 (ACE INHIBITORS PLAIN)     | 0 |
|    | Antihypertensives | DELAPRIL                                              | C9 (RENIN-ANGIOTEN SYS AGENT) | C9A0 (ACE INHIBITORS PLAIN)     | 0 |
| 31 | Antihypertensives | ENALAPRIL                                             | C9 (RENIN-ANGIOTEN SYS AGENT) | C9A0 (ACE INHIBITORS PLAIN)     | 1 |
|    | Antihypertensives | EPROSARTAN                                            | C9 (RENIN-ANGIOTEN SYS AGENT) | C9C0 (ANGIOTEN-II ANTAG, PLAIN) | 0 |
| 32 | Antihypertensives | FOSINOPRIL                                            | C9 (RENIN-ANGIOTEN SYS AGENT) | C9A0 (ACE INHIBITORS PLAIN)     | 0 |
|    | Antihypertensives | FOSINOPRIL#HYDROCHLOROTHIAZIDE                        | C9 (RENIN-ANGIOTEN SYS AGENT) | C9B1 (ACE INH COMB+A-HYP/DIUR)  | 0 |
| 33 | Antihypertensives | HYDROCHLOROTHIAZIDE#IRBESARTAN                        | C9 (RENIN-ANGIOTEN SYS AGENT) | C9D1 (AT2 ANTG COMB C2 &/O DIU) | 0 |
| 34 | Antihypertensives | HYDROCHLOROTHIAZIDE#LOSARTAN                          | C9 (RENIN-ANGIOTEN SYS AGENT) | C9D1 (AT2 ANTG COMB C2 &/O DIU) | 0 |
|    | Antihypertensives | HYDROCHLOROTHIAZIDE#OLMESARTAN MEDOXOMIL              | C9 (RENIN-ANGIOTEN SYS AGENT) | C9D1 (AT2 ANTG COMB C2 &/O DIU) | 0 |
| 35 | Antihypertensives | HYDROCHLOROTHIAZIDE#QUINAPRIL                         | C9 (RENIN-ANGIOTEN SYS AGENT) | C9B1 (ACE INH COMB+A-HYP/DIUR)  | 0 |
| 36 | Antihypertensives | HYDROCHLOROTHIAZIDE#RAMIPRIL                          | C9 (RENIN-ANGIOTEN SYS AGENT) | C9B1 (ACE INH COMB+A-HYP/DIUR)  | 0 |
|    | Antihypertensives | HYDROCHLOROTHIAZIDE#TELMISARTAN                       | C9 (RENIN-ANGIOTEN SYS AGENT) | C9D1 (AT2 ANTG COMB C2 &/O DIU) | 0 |
| 37 | Antihypertensives | HYDROCHLOROTHIAZIDE#VALSARTAN                         | C9 (RENIN-ANGIOTEN SYS AGENT) | C9D1 (AT2 ANTG COMB C2 &/O DIU) | 0 |
| 38 | Antihypertensives | IMIDAPRIL                                             | C9 (RENIN-ANGIOTEN SYS AGENT) | C9A0 (ACE INHIBITORS PLAIN)     | 0 |
| 39 | Antihypertensives | INDAPAMIDE#PERINDOPRIL                                | C9 (RENIN-ANGIOTEN SYS AGENT) | C9B1 (ACE INH COMB+A-HYP/DIUR)  | 0 |
| 40 | Antihypertensives | IRBESARTAN                                            | C9 (RENIN-ANGIOTEN SYS AGENT) | C9C0 (ANGIOTEN-II ANTAG, PLAIN) | 0 |
|    | Antihypertensives | LISINAPRIL                                            | C9 (RENIN-ANGIOTEN SYS AGENT) | C9A0 (ACE INHIBITORS PLAIN )    | 0 |
| 41 | Antihypertensives | LOSARTAN                                              | C9 (RENIN-ANGIOTEN SYS AGENT) | C9C0 (ANGIOTEN-II ANTAG, PLAIN) | 0 |
| 42 | Antihypertensives | OLMESARTAN MEDOXOMIL                                  | C9 (RENIN-ANGIOTEN SYS AGENT) | C9C0 (ANGIOTEN-II ANTAG, PLAIN) | 0 |
| 43 | Antihypertensives | PERINDOPRIL                                           | C9 (RENIN-ANGIOTEN SYS AGENT) | C9A0 (ACE INHIBITORS PLAIN )    | 0 |
|    | Antihypertensives | QUINAPRIL                                             | C9 (RENIN-ANGIOTEN SYS AGENT) | C9A0 (ACE INHIBITORS PLAIN )    | 0 |
| 44 | Antihypertensives | RAMIPRIL                                              | C9 (RENIN-ANGIOTEN SYS AGENT) | C9A0 (ACE INHIBITORS PLAIN)     | 0 |
|    | Antihypertensives | TELMISARTAN                                           | C9 (RENIN-ANGIOTEN SYS AGENT) | C9C0 (ANGIOTEN-II ANTAG, PLAIN) | 0 |
| 45 | Antihypertensives | VALSARTAN                                             | C9 (RENIN-ANGIOTEN SYS AGENT) | C9C0 (ANGIOTEN-II ANTAG, PLAIN) | 0 |
| 46 | Cardiac Therapy   | ADENOSINE                                             | C1 (CARDIAC THERAPY)          | C1B0 (ANTIARRHYTHMICS)          | 0 |

both ingredients listed separately, not in combo

1  
2  
3  
4  
5  
6  
7  
8  
9  
10  
11  
12  
13  
14  
15  
16  
17  
18  
19  
20  
21  
22  
23  
24  
25  
26  
27  
28  
29  
30  
31  
32  
33  
34  
35  
36  
37  
38  
39  
40  
41  
42  
43  
44  
45  
46  
47  
48  
49

|    |                  |                                                     |                                |                                  |   |
|----|------------------|-----------------------------------------------------|--------------------------------|----------------------------------|---|
| 1  | Cardiac Therapy  | AMIODARONE                                          | C1 (CARDIAC THERAPY)           | C1B0 (ANTIARRHYTHMICS)           | 1 |
| 2  | Cardiac Therapy  | AMRINONE                                            | C1 (CARDIAC THERAPY)           | C1F0 (POSITIVE INOTROPIC AGENT)  | 0 |
| 3  | Cardiac Therapy  | CAFFEINE#ETAMIVAN                                   | C1 (CARDIAC THERAPY)           | C1C1 (CARDIAC STM EX DOPAM AGT)  | 0 |
| 4  | Cardiac Therapy  | DIGITALIS PURPUREA                                  | C1 (CARDIAC THERAPY)           | C1A1 (CARDIAC GLYCOSIDES PLAIN)  | 0 |
| 5  | Cardiac Therapy  | DIGITOXIN                                           | C1 (CARDIAC THERAPY)           | C1A1 (CARDIAC GLYCOSIDES PLAIN)  | 0 |
| 6  | Cardiac Therapy  | DIGOXIN                                             | C1 (CARDIAC THERAPY)           | C1A1 (CARDIAC GLYCOSIDES PLAIN)  | 1 |
| 7  | Cardiac Therapy  | DISOPYRAMIDE                                        | C1 (CARDIAC THERAPY)           | C1B0 (ANTIARRHYTHMICS)           | 0 |
| 8  | Cardiac Therapy  | DOBUTAMINE                                          | C1 (CARDIAC THERAPY)           | C1C2 (CARDIAC DOPAMINERG AGENT)  | 1 |
| 9  | Cardiac Therapy  | DOPAMINE                                            | C1 (CARDIAC THERAPY)           | C1C2 (CARDIAC DOPAMINERG AGENT)  | 1 |
| 10 | Cardiac Therapy  | EPINEPHRINE                                         | C1 (CARDIAC THERAPY)           | C1C1 (CARDIAC STM EX DOPAM AGT)  | 1 |
| 11 | Cardiac Therapy  | ETAFEDRINE                                          | C1 (CARDIAC THERAPY)           | C1C1 (CARDIAC STM EX DOPAM AGT)  | 0 |
| 12 | Cardiac Therapy  | ETILEFRINE                                          | C1 (CARDIAC THERAPY)           | C1C1 (CARDIAC STM EX DOPAM AGT)  | 0 |
| 13 | Cardiac Therapy  | FLECAINIDE                                          | C1 (CARDIAC THERAPY)           | C1B0 (ANTIARRHYTHMICS)           | 0 |
| 14 | Cardiac Therapy  | GLYCINE MAX#UBIDECARENONE                           | C1 (CARDIAC THERAPY)           | C1X0 (ALL OTHER CARDIAC PREFS)   | 0 |
| 15 | Cardiac Therapy  | ISOPRENALINE                                        | C1 (CARDIAC THERAPY)           | C1C1 (CARDIAC STM EX DOPAM AGT)  | 0 |
| 16 | Cardiac Therapy  | ISOSORBIDE DINITRATE                                | C1 (CARDIAC THERAPY)           | C1E0 (NITRITES AND NITRATES)     | 1 |
| 17 | Cardiac Therapy  | ISOSORBIDE MONONITRATE                              | C1 (CARDIAC THERAPY)           | C1E0 (NITRITES AND NITRATES)     | 1 |
| 18 | Cardiac Therapy  | IVABRADINE                                          | C1 (CARDIAC THERAPY)           | C1D0 (CORONRY THER EXC C AN+ND)  | 0 |
| 19 | Cardiac Therapy  | LIDOCAINE                                           | C1 (CARDIAC THERAPY)           | C1B0 (ANTIARRHYTHMICS)           | 1 |
| 20 | Cardiac Therapy  | MAGNESIUM#POTASSIUM#PROCAINE                        | C1 (CARDIAC THERAPY)           | C1X0 (ALL OTHER CARDIAC PREFS)   | 0 |
| 21 | Cardiac Therapy  | METARAMINOL                                         | C1 (CARDIAC THERAPY)           | C1C1 (CARDIAC STM EX DOPAM AGT)  | 1 |
| 22 | Cardiac Therapy  | METILDIGOXIN                                        | C1 (CARDIAC THERAPY)           | C1A1 (CARDIAC GLYCOSIDES PLAIN)  | 0 |
| 23 | Cardiac Therapy  | MEXILETINE                                          | C1 (CARDIAC THERAPY)           | C1B0 (ANTIARRHYTHMICS)           | 0 |
| 24 | Cardiac Therapy  | MIDODRINE                                           | C1 (CARDIAC THERAPY)           | C1C1 (CARDIAC STM EX DOPAM AGT)  | 0 |
| 25 | Cardiac Therapy  | MILRINONE                                           | C1 (CARDIAC THERAPY)           | C1F0 (POSITIVE INOTROPIC AGENT)  | 0 |
| 26 | Cardiac Therapy  | NITROGLYCERIN                                       | C1 (CARDIAC THERAPY)           | C1E0 (NITRITES AND NITRATES)     | 0 |
| 27 | Cardiac Therapy  | NOREPINEPHRINE                                      | C1 (CARDIAC THERAPY)           | C1C1 (CARDIAC STM EX DOPAM AGT)  | 0 |
| 28 | Cardiac Therapy  | OXYFEDRINE                                          | C1 (CARDIAC THERAPY)           | C1D0 (CORONRY THER EXC C AN+ND)  | 0 |
| 29 | Cardiac Therapy  | PENTAERYTHRITYL TETRANITRATE                        | C1 (CARDIAC THERAPY)           | C1E0 (NITRITES AND NITRATES)     | 0 |
| 30 | Cardiac Therapy  | PROCAINAMIDE                                        | C1 (CARDIAC THERAPY)           | C1B0 (ANTIARRHYTHMICS)           | 1 |
| 31 | Cardiac Therapy  | PROPAFENONE                                         | C1 (CARDIAC THERAPY)           | C1B0 (ANTIARRHYTHMICS)           | 1 |
| 32 | Cardiac Therapy  | QUINIDINE                                           | C1 (CARDIAC THERAPY)           | C1B0 (ANTIARRHYTHMICS)           | 0 |
| 33 | Cardiac Therapy  | TOCAINIDE                                           | C1 (CARDIAC THERAPY)           | C1B0 (ANTIARRHYTHMICS)           | 0 |
| 34 | Cardiac Therapy  | TRIMETAZIDINE                                       | C1 (CARDIAC THERAPY)           | C1D0 (CORONRY THER EXC C AN+ND)  | 0 |
| 35 | Cardiac Therapy  | UBIDECARENONE                                       | C1 (CARDIAC THERAPY)           | C1X0 (ALL OTHER CARDIAC PREFS)   | 0 |
| 36 | Cardiac Therapy  | UBIQUINONE(S)                                       | C1 (CARDIAC THERAPY)           | C1X0 (ALL OTHER CARDIAC PREFS)   | 0 |
| 37 | Lipid Regulating | ACIPIMOX                                            | C10 (LIP.REG./ANTI-ATH. PREPS) | C10A9 (OTH.CHOLEST&TRIGLY.REGUL) | 0 |
| 38 | Lipid Regulating | ALLIUM SATIVUM                                      | C10 (LIP.REG./ANTI-ATH. PREPS) | C10B0 (ANTI-ATHEROMA NATRL ORIG) | 0 |
| 39 | Lipid Regulating | ALLIUM SATIVUM#ARACHIS HYPOGAEA                     | C10 (LIP.REG./ANTI-ATH. PREPS) | C10B0 (ANTI-ATHEROMA NATRL ORIG) | 0 |
| 40 | Lipid Regulating | ALLIUM SATIVUM#SOYA LECITHIN                        | C10 (LIP.REG./ANTI-ATH. PREPS) | C10B0 (ANTI-ATHEROMA NATRL ORIG) | 0 |
| 41 | Lipid Regulating | AMLODIPINE#ATORVASTATIN                             | C11 (C.V. MULTITH. COMB PROD)  | C11A1 (LIPREG.CV.MULT-TH.FX.COM) | 0 |
| 42 | Lipid Regulating | ATORVASTATIN                                        | C10 (LIP.REG./ANTI-ATH. PREPS) | C10A1 (STATINS (HMG-COA RED))    | 0 |
| 43 | Lipid Regulating | BEZAFIBRATE                                         | C10 (LIP.REG./ANTI-ATH. PREPS) | C10A2 (FIBRATES)                 | 0 |
| 44 | Lipid Regulating | CERIVASTATIN                                        | C10 (LIP.REG./ANTI-ATH. PREPS) | C10A1 (STATINS (HMG-COA RED))    | 0 |
| 45 | Lipid Regulating | COLESTYRAMINE                                       | C10 (LIP.REG./ANTI-ATH. PREPS) | C10A3 (ION-EXCHANGE RESINS)      | 0 |
| 46 | Lipid Regulating | DOCOSAHEXANOIC ACID#EICOSAPENTAENOIC ACID           | C10 (LIP.REG./ANTI-ATH. PREPS) | C10B0 (ANTI-ATHEROMA NATRL ORIG) | 0 |
| 47 | Lipid Regulating | DOCOSAHEXANOIC ACID#EICOSAPENTAENOIC ACID#VITAMIN E | C10 (LIP.REG./ANTI-ATH. PREPS) | C10B0 (ANTI-ATHEROMA NATRL ORIG) | 0 |
| 48 | Lipid Regulating | EZETIMIBE                                           | C10 (LIP.REG./ANTI-ATH. PREPS) | C10A9 (OTH.CHOLEST&TRIGLY.REGUL) | 0 |
| 49 | Lipid Regulating | EZETIMIBE#SIMVASTATIN                               | C10 (LIP.REG./ANTI-ATH. PREPS) | C10C0 (LIP.REG.CO.W.OTHLIP.REG)  | 0 |
| 50 | Lipid Regulating | FENOFIBRATE                                         | C10 (LIP.REG./ANTI-ATH. PREPS) | C10A2 (FIBRATES)                 | 0 |
| 51 | Lipid Regulating | FISH                                                | C10 (LIP.REG./ANTI-ATH. PREPS) | C10B0 (ANTI-ATHEROMA NATRL ORIG) | 0 |
| 52 | Lipid Regulating | FISH#SOYA LECITHIN                                  | C10 (LIP.REG./ANTI-ATH. PREPS) | C10B0 (ANTI-ATHEROMA NATRL ORIG) | 0 |
| 53 | Lipid Regulating | FLUVASTATIN                                         | C10 (LIP.REG./ANTI-ATH. PREPS) | C10A1 (STATINS (HMG-COA RED) )   | 0 |
| 54 | Lipid Regulating | GEMFIBROZIL                                         | C10 (LIP.REG./ANTI-ATH. PREPS) | C10A2 (FIBRATES)                 | 1 |
| 55 | Lipid Regulating | LECITHIN                                            | C10 (LIP.REG./ANTI-ATH. PREPS) | C10B0 (ANTI-ATHEROMA NATRL ORIG) | 0 |
| 56 | Lipid Regulating | LECITHIN#SOYA LECITHIN                              | C10 (LIP.REG./ANTI-ATH. PREPS) | C10B0 (ANTI-ATHEROMA NATRL ORIG) | 0 |
| 57 | Lipid Regulating | NICOTINIC ACID                                      | C10 (LIP.REG./ANTI-ATH. PREPS) | C10A9 (OTH.CHOLEST&TRIGLY.REGUL) | 1 |
| 58 | Lipid Regulating | PITAVASTATIN                                        | C10 (LIP.REG./ANTI-ATH. PREPS) | C10A1 (STATINS (HMG-COA RED))    | 0 |
| 59 | Lipid Regulating | PRAVASTATIN                                         | C10 (LIP.REG./ANTI-ATH. PREPS) | C10A1 (STATINS (HMG-COA RED))    | 1 |
| 60 | Lipid Regulating | PROBUCOL                                            | C10 (LIP.REG./ANTI-ATH. PREPS) | C10A9 (OTH.CHOLEST&TRIGLY.REGUL) | 0 |
| 61 | Lipid Regulating | PYRICARBATE                                         | C10 (LIP.REG./ANTI-ATH. PREPS) | C10A9 (OTH.CHOLEST&TRIGLY.REGUL) | 0 |
| 62 | Lipid Regulating | ROSUVASTATIN                                        | C10 (LIP.REG./ANTI-ATH. PREPS) | C10A1 (STATINS (HMG-COA RED))    | 0 |
| 63 | Lipid Regulating | SALMON                                              | C10 (LIP.REG./ANTI-ATH. PREPS) | C10B0 (ANTI-ATHEROMA NATRL ORIG) | 1 |
| 64 | Lipid Regulating | SIMVASTATIN                                         | C10 (LIP.REG./ANTI-ATH. PREPS) | C10A1 (STATINS (HMG-COA RED))    | 1 |
| 65 | Lipid Regulating | SOYA LECITHIN                                       | C10 (LIP.REG./ANTI-ATH. PREPS) | C10B0 (ANTI-ATHEROMA NATRL ORIG) | 0 |
| 66 | CANCER           |                                                     |                                |                                  |   |
| 67 | Antineoplastics  | ALEMTUZUMAB                                         | L1 (ANTINEOPLASTICS)           | L1X3 (ANTINEOPLASTIC MABS)       | 0 |
| 68 | Antineoplastics  | ALTRETAMINE                                         | L1 (ANTINEOPLASTICS)           | L1A0 (ALKYLATING AGENTS)         | 0 |

only listed in combo with lidocaine

listed as "calcitonic salmon" on NLEM

|    |                     |                      |                              |                                 |   |
|----|---------------------|----------------------|------------------------------|---------------------------------|---|
| 1  | Antineoplastics     | ASPARAGINASE         | L1 (ANTINEOPLASTICS)         | L1X9 (ALL OTH. ANTINEOPLASTICS) | 0 |
|    | Antineoplastics     | AZACITIDINE          | L1 (ANTINEOPLASTICS)         | L1B0 (ANTIMETABOLITES)          | 0 |
|    | Antineoplastics     | BEVACIZUMAB          | L1 (ANTINEOPLASTICS)         | L1X3 (ANTINEOPLASTIC MABS)      | 0 |
| 2  | Antineoplastics     | BLEOMYCIN            | L1 (ANTINEOPLASTICS)         | L1D0 (ANTINEOPLAS. ANTIBIOTICS) | 1 |
| 3  | Antineoplastics     | BORTEZOMIB           | L1 (ANTINEOPLASTICS)         | L1X9 (ALL OTH. ANTINEOPLASTICS) | 0 |
|    | Antineoplastics     | BUSULFAN             | L1 (ANTINEOPLASTICS)         | L1A0 (ALKYLATING AGENTS)        | 1 |
| 4  | Antineoplastics     | CAPECITABINE         | L1 (ANTINEOPLASTICS)         | L1B0 (ANTIMETABOLITES)          | 0 |
| 5  | Antineoplastics     | CARBOPLATIN          | L1 (ANTINEOPLASTICS)         | L1X2 (PLATINUM COMPOUNDS)       | 1 |
|    | Antineoplastics     | CARMUSTINE           | L1 (ANTINEOPLASTICS)         | L1A0 (ALKYLATING AGENTS)        | 1 |
| 6  | Antineoplastics     | CETUXIMAB            | L1 (ANTINEOPLASTICS)         | L1X3 (ANTINEOPLASTIC MABS)      | 0 |
| 7  | Antineoplastics     | CHLORAMBUCIL         | L1 (ANTINEOPLASTICS)         | L1A0 (ALKYLATING AGENTS)        | 1 |
|    | Antineoplastics     | CHLORMETHINE         | L1 (ANTINEOPLASTICS)         | L1A0 (ALKYLATING AGENTS )       | 0 |
| 8  | Antineoplastics     | CISPLATIN            | L1 (ANTINEOPLASTICS)         | L1X2 (PLATINUM COMPOUNDS)       | 1 |
| 9  | Antineoplastics     | CLADRIBINE           | L1 (ANTINEOPLASTICS)         | L1B0 (ANTIMETABOLITES)          | 0 |
|    | Antineoplastics     | CYCLOPHOSPHAMIDE     | L1 (ANTINEOPLASTICS)         | L1A0 (ALKYLATING AGENTS)        | 1 |
| 10 | Antineoplastics     | CYTARABINE           | L1 (ANTINEOPLASTICS)         | L1B0 (ANTIMETABOLITES)          | 1 |
| 11 | Antineoplastics     | DACARBAZINE          | L1 (ANTINEOPLASTICS)         | L1A0 (ALKYLATING AGENTS)        | 0 |
|    | Antineoplastics     | DACTINOMYCIN         | L1 (ANTINEOPLASTICS)         | L1D0 (ANTINEOPLAS. ANTIBIOTICS) | 1 |
| 12 | Antineoplastics     | DASATINIB            | L1 (ANTINEOPLASTICS)         | L1X4 (A-NEO PROTEIN KINASE INH) | 0 |
| 13 | Antineoplastics     | DECITABINE           | L1 (ANTINEOPLASTICS)         | L1B0 (ANTIMETABOLITES)          | 0 |
|    | Antineoplastics     | DOCETAXEL            | L1 (ANTINEOPLASTICS)         | L1C0 (VINCA ALKALOIDS )         | 0 |
| 14 | Antineoplastics     | DOXORUBICIN          | L1 (ANTINEOPLASTICS)         | L1D0 (ANTINEOPLAS. ANTIBIOTICS) | 1 |
| 15 | Antineoplastics     | EPIDRUBICIN          | L1 (ANTINEOPLASTICS)         | L1D0 (ANTINEOPLAS. ANTIBIOTICS) | 1 |
| 16 | Antineoplastics     | ERLOTINIB            | L1 (ANTINEOPLASTICS)         | L1X4 (A-NEO PROTEIN KINASE INH) | 0 |
|    | Antineoplastics     | ETOPOSIDE            | L1 (ANTINEOPLASTICS)         | L1C0 (VINCA ALKALOIDS)          | 1 |
| 17 | Antineoplastics     | FLUDARABINE          | L1 (ANTINEOPLASTICS)         | L1B0 (ANTIMETABOLITES)          | 0 |
| 18 | Antineoplastics     | FLUOROURACIL         | L1 (ANTINEOPLASTICS)         | L1B0 (ANTIMETABOLITES)          | 1 |
|    | Antineoplastics     | GEFITINIB            | L1 (ANTINEOPLASTICS)         | L1X4 (A-NEO PROTEIN KINASE INH) | 0 |
| 19 | Antineoplastics     | GEMCITABINE          | L1 (ANTINEOPLASTICS)         | L1B0 (ANTIMETABOLITES)          | 0 |
| 20 | Antineoplastics     | HYDROXYCARBAMIDE     | L1 (ANTINEOPLASTICS)         | L1X9 (ALL OTH. ANTINEOPLASTICS) | 0 |
|    | Antineoplastics     | IBRITUMOMAB TIUXETAN | L1 (ANTINEOPLASTICS)         | L1X3 (ANTINEOPLASTIC MABS)      | 0 |
| 21 | Antineoplastics     | IDARUBICIN           | L1 (ANTINEOPLASTICS)         | L1D0 (ANTINEOPLAS. ANTIBIOTICS) | 1 |
| 22 | Antineoplastics     | IPOSFAMIDE           | L1 (ANTINEOPLASTICS)         | L1A0 (ALKYLATING AGENTS)        | 1 |
|    | Antineoplastics     | IMATINIB             | L1 (ANTINEOPLASTICS)         | L1X4 (A-NEO PROTEIN KINASE INH) | 0 |
| 23 | Antineoplastics     | IRINOTECAN           | L1 (ANTINEOPLASTICS)         | L1C0 (VINCA ALKALOIDS)          | 0 |
| 24 | Antineoplastics     | IXABEPILONE          | L1 (ANTINEOPLASTICS)         | L1X9 (ALL OTH. ANTINEOPLASTICS) | 0 |
|    | Antineoplastics     | LAPATINIB            | L1 (ANTINEOPLASTICS)         | L1X4 (A-NEO PROTEIN KINASE INH) | 0 |
| 25 | Antineoplastics     | LOMUSTINE            | L1 (ANTINEOPLASTICS)         | L1A0 (ALKYLATING AGENTS)        | 1 |
| 26 | Antineoplastics     | MELPHALAN            | L1 (ANTINEOPLASTICS)         | L1A0 (ALKYLATING AGENTS)        | 1 |
|    | Antineoplastics     | MERCAPTOPURINE       | L1 (ANTINEOPLASTICS)         | L1B0 (ANTIMETABOLITES)          | 1 |
| 27 | Antineoplastics     | METHOTREXATE         | L1 (ANTINEOPLASTICS)         | L1B0 (ANTIMETABOLITES)          | 1 |
|    | Antineoplastics     | MITOMYCIN            | L1 (ANTINEOPLASTICS)         | L1D0 (ANTINEOPLAS. ANTIBIOTICS) | 1 |
| 28 | Antineoplastics     | MITOXANTRONE         | L1 (ANTINEOPLASTICS)         | L1D0 (ANTINEOPLAS. ANTIBIOTICS) | 0 |
| 29 | Antineoplastics     | NILOTINIB            | L1 (ANTINEOPLASTICS)         | L1X4 (A-NEO PROTEIN KINASE INH) | 0 |
|    | Antineoplastics     | OXALIPLATIN          | L1 (ANTINEOPLASTICS)         | L1X2 (PLATINUM COMPOUNDS)       | 0 |
| 30 | Antineoplastics     | PACLITAXEL           | L1 (ANTINEOPLASTICS)         | L1C0 (VINCA ALKALOIDS)          | 1 |
| 31 | Antineoplastics     | PEMETREXED           | L1 (ANTINEOPLASTICS)         | L1B0 (ANTIMETABOLITES)          | 0 |
|    | Antineoplastics     | PROCARBAZINE         | L1 (ANTINEOPLASTICS)         | L1X9 (ALL OTH. ANTINEOPLASTICS) | 1 |
| 32 | Antineoplastics     | RITUXIMAB            | L1 (ANTINEOPLASTICS)         | L1X3 (ANTINEOPLASTIC MABS)      | 0 |
| 33 | Antineoplastics     | SORAFENIB            | L1 (ANTINEOPLASTICS)         | L1X4 (A-NEO PROTEIN KINASE INH) | 0 |
|    | Antineoplastics     | SUNITINIB            | L1 (ANTINEOPLASTICS)         | L1X4 (A-NEO PROTEIN KINASE INH) | 0 |
| 34 | Antineoplastics     | TEGAFUR              | L1 (ANTINEOPLASTICS)         | L1B0 (ANTIMETABOLITES)          | 0 |
| 35 | Antineoplastics     | TEGAFUR#URACIL       | L1 (ANTINEOPLASTICS)         | L1B0 (ANTIMETABOLITES)          | 1 |
| 36 | Antineoplastics     | TEMOZOLOMIDE         | L1 (ANTINEOPLASTICS)         | L1A0 (ALKYLATING AGENTS)        | 0 |
|    | Antineoplastics     | TIOGUANINE           | L1 (ANTINEOPLASTICS)         | L1B0 (ANTIMETABOLITES)          | 0 |
| 37 | Antineoplastics     | TOPOTECAN            | L1 (ANTINEOPLASTICS)         | L1C0 (VINCA ALKALOIDS)          | 0 |
| 38 | Antineoplastics     | TRASTUZUMAB          | L1 (ANTINEOPLASTICS)         | L1X3 (ANTINEOPLASTIC MABS)      | 0 |
|    | Antineoplastics     | TRETINOIN            | L1 (ANTINEOPLASTICS)         | L1X9 (ALL OTH. ANTINEOPLASTICS) | 0 |
| 39 | Antineoplastics     | VINBLASTINE          | L1 (ANTINEOPLASTICS)         | L1C0 (VINCA ALKALOIDS)          | 1 |
| 40 | Antineoplastics     | VINCRIStINE          | L1 (ANTINEOPLASTICS)         | L1C0 (VINCA ALKALOIDS)          | 1 |
|    | Antineoplastics     | VINORELBINE          | L1 (ANTINEOPLASTICS)         | L1C0 (VINCA ALKALOIDS)          | 0 |
| 41 | Cytostatic Hormones | AMINOGLUTETHIMIDE    | L2 (CYTOSTATIC HORMONE THER) | L2B3 (CYTOSTAT AROMATASE INHIB) | 0 |
|    | Cytostatic Hormones | ANASTROZOLE          | L2 (CYTOSTATIC HORMONE THER) | L2B3 (CYTOSTAT AROMATASE INHIB) | 0 |
| 42 | Cytostatic Hormones | BICALUTAMIDE         | L2 (CYTOSTATIC HORMONE THER) | L2B2 (CYTO ANTI-ANDROGENS)      | 0 |
| 43 | Cytostatic Hormones | BUSERELIN            | L2 (CYTOSTATIC HORMONE THER) | L2A3 (CYTO GONAD HORMON ANALOG) | 1 |
| 44 | Cytostatic Hormones | CYPROTERONE          | L2 (CYTOSTATIC HORMONE THER) | L2B2 (CYTO ANTI-ANDROGENS)      | 1 |
|    | Cytostatic Hormones | EXEMESTANE           | L2 (CYTOSTATIC HORMONE THER) | L2B3 (CYTOSTAT AROMATASE INHIB) | 0 |
| 45 | Cytostatic Hormones | FLUTAMIDE            | L2 (CYTOSTATIC HORMONE THER) | L2B2 (CYTO ANTI-ANDROGENS)      | 1 |
| 46 | Cytostatic Hormones | FORMESTANE           | L2 (CYTOSTATIC HORMONE THER) | L2B3 (CYTOSTAT AROMATASE INHIB) | 1 |

|    |                          |                      |                               |                                 |   |
|----|--------------------------|----------------------|-------------------------------|---------------------------------|---|
| 1  | Cytostatic Hormones      | FULVESTRANT          | L2 (CYTOSTATIC HORMONE THER)  | L2B9 (OTH CYTO HORMON ANTAGIST) | 0 |
| 2  | Cytostatic Hormones      | GOSERELIN            | L2 (CYTOSTATIC HORMONE THER)  | L2A3 (CYTO GONAD HORMON ANALOG) | 1 |
| 3  | Cytostatic Hormones      | LETROZOLE            | L2 (CYTOSTATIC HORMONE THER)  | L2B3 (CYTOSTAT AROMATASE INHIB) | 0 |
| 4  | Cytostatic Hormones      | LEUPRORELIN          | L2 (CYTOSTATIC HORMONE THER)  | L2A3 (CYTO GONAD HORMON ANALOG) | 1 |
| 5  | Cytostatic Hormones      | MEDROXYPROGESTERONE  | L2 (CYTOSTATIC HORMONE THER)  | L2A2 (CYTOSTATIC PROGESTOGENS ) | 0 |
| 6  | Cytostatic Hormones      | MEGESTROL            | L2 (CYTOSTATIC HORMONE THER)  | L2A2 (CYTOSTATIC PROGESTOGENS ) | 1 |
| 7  | Cytostatic Hormones      | TAMOXIFEN            | L2 (CYTOSTATIC HORMONE THER)  | L2B1 (CYTO ANTI-OESTROGENS)     | 1 |
| 8  | Cytostatic Hormones      | TOREMIFENE           | L2 (CYTOSTATIC HORMONE THER)  | L2B1 (CYTO ANTI-OESTROGENS)     | 0 |
| 9  | Cytostatic Hormones      | TRIPTORELIN          | L2 (CYTOSTATIC HORMONE THER)  | L2A3 (CYTO GONAD HORMON ANALOG) | 0 |
| 10 | Immunostimulating Agents | FILGRASTIM           | L3 (IMMUNOSTIMULATING AGENTS) | L3A1 (COLONY-STIMULATING FACT.) | 1 |
| 11 | Immunostimulating Agents | INTERFERON ALFA      | L3 (IMMUNOSTIMULATING AGENTS) | L3B1 (INTERFERONS ALPHA)        | 0 |
| 12 | Immunostimulating Agents | INTERFERON ALFA-2A   | L3 (IMMUNOSTIMULATING AGENTS) | L3B1 (INTERFERONS ALPHA)        | 0 |
| 13 | Immunostimulating Agents | INTERFERON ALFA-2B   | L3 (IMMUNOSTIMULATING AGENTS) | L3B1 (INTERFERONS ALPHA)        | 0 |
| 14 | Immunostimulating Agents | INTERFERON ALFA-N1   | L3 (IMMUNOSTIMULATING AGENTS) | L3B1 (INTERFERONS ALPHA)        | 0 |
| 15 | Immunostimulating Agents | INTERFERON BETA-1A   | L3 (IMMUNOSTIMULATING AGENTS) | L3B2 (INTERFERONS BETA)         | 0 |
| 16 | Immunostimulating Agents | INTERFERON BETA-1B   | L3 (IMMUNOSTIMULATING AGENTS) | L3B2 (INTERFERONS BETA)         | 0 |
| 17 | Immunostimulating Agents | LENOGRASTIM          | L3 (IMMUNOSTIMULATING AGENTS) | L3A1 (COLONY-STIMULATING FACT.) | 1 |
| 18 | Immunostimulating Agents | MOLGRAMOSTIM         | L3 (IMMUNOSTIMULATING AGENTS) | L3A1 (COLONY-STIMULATING FACT.) | 1 |
| 19 | Immunostimulating Agents | PEGFILGRASTIM        | L3 (IMMUNOSTIMULATING AGENTS) | L3A1 (COLONY-STIMULATING FACT.) | 0 |
| 20 | Immunostimulating Agents | TETRACHLORODECAOXIDE | L3 (IMMUNOSTIMULATING AGENTS) | L3A9 (OTH.IMMUNOSTIM.EX.INTFRN) | 0 |
| 21 | Immunostimulating Agents | THYMALFASIN          | L3 (IMMUNOSTIMULATING AGENTS) | L3A9 (OTH.IMMUNOSTIM.EX.INTFRN) | 0 |

Appendix Table 2. Segmented Regression Coefficients: Total Volume\*

|                                 | INTERCEPT | TIME                    | INTERVENTION            | TIME AFTER INTERVENTION | TIME AFTER INTERVENTION SQUARED** |
|---------------------------------|-----------|-------------------------|-------------------------|-------------------------|-----------------------------------|
|                                 | Beta      | Beta (Std. Err.)        | Beta (Std. Err.)        | Beta (Std. Err.)        | Beta (Std. Err.)                  |
| <b>DIABETES</b>                 |           |                         |                         |                         |                                   |
| <u>Insulins</u>                 |           |                         |                         |                         |                                   |
| Hospital                        | 1.6941    | <b>0.0848 (0.0185)</b>  | <b>0.5151 (0.2400)</b>  | <b>0.0961 (0.0432)</b>  | <b>0.0156 (0.0019)</b>            |
| Retail                          | 0.3485    | <b>-0.0134 (0.0041)</b> | 0.0902 (0.0445)         | <b>0.0288 (0.0046)</b>  | -                                 |
| <u>Antidiabetics</u>            |           |                         |                         |                         |                                   |
| Hospital                        | 1252.37   | <b>71.08 (12.05)</b>    | 66.40 (167.31)          | 12.80 (26.17)           | <b>3.08 (1.24)</b>                |
| Retail                          | 228.87    | <b>6.67 (3.01)</b>      | -63.98 (32.56)          | -1.88 (3.37)            | -                                 |
| <b>CARDIOVASCULAR DISEASE</b>   |           |                         |                         |                         |                                   |
| <u>Antihypertensives</u>        |           |                         |                         |                         |                                   |
| Hospital                        | 1394.24   | <b>111.96 (17.14)</b>   | <b>-390.49 (185.18)</b> | <b>71.95 (19.17)</b>    | -                                 |
| Retail                          | 284.98    | <b>8.12 (2.24)</b>      | -39.71 (24.19)          | <b>5.20 (2.50)</b>      | -                                 |
| <u>Lipid Regulating Agents</u>  |           |                         |                         |                         |                                   |
| Hospital                        | 193.47    | <b>17.31 (3.33)</b>     | -37.98 (43.19)          | -6.02 (7.78)            | <b>2.77 (0.34)</b>                |
| Retail                          | 136.25    | -2.59 (1.31)            | -21.37 (14.18)          | <b>11.72 (1.47)</b>     | -                                 |
| <u>Cardiac Therapy</u>          |           |                         |                         |                         |                                   |
| Hospital                        | 434.75    | <b>13.92 (4.11)</b>     | <b>-94.51 (44.37)</b>   | 0.63 (4.59)             | -                                 |
| Retail                          | 98.32     | 1.63 (1.18)             | 11.50 (15.31)           | <b>-8.80 (2.76)</b>     | <b>0.32 (0.12)</b>                |
| <b>CANCER</b>                   |           |                         |                         |                         |                                   |
| <u>Antineoplastics</u>          |           |                         |                         |                         |                                   |
| Hospital                        | 21.75     | <b>0.72 (0.16)</b>      | -2.02 (1.78)            | 0.21 (0.18)             | -                                 |
| Retail                          | 0.26      | 0.004 (0.02)            | 0.18 (0.37)             | 0.05 (0.06)             | -0.005 (0.002)                    |
| <u>Cytostatic Hormones</u>      |           |                         |                         |                         |                                   |
| Hospital                        | 16.38     | <b>0.69 (0.15)</b>      | -0.66 (1.60)            | <b>0.44 (0.17)</b>      | -                                 |
| Retail                          | 0.3538    | <b>-0.03 (0.01)</b>     | <b>0.53 (0.13)</b>      | -0.03 (0.02)            | <b>0.004 (0.001)</b>              |
| <u>Immunostimulating Agents</u> |           |                         |                         |                         |                                   |
| Hospital                        | 0.45      | <b>0.01 (0.004)</b>     | <b>-0.18 (0.05)</b>     | -0.02 (0.008)           | 0.0007 (0.0004)                   |
| Retail                          | 0.0000066 | -0.0000005 (0.000001)   | 0.0000003 (0.000007)    | 0.0000005 (0.0000007)   | -                                 |

\* **Bold** signifies statistically significant coefficient (i.e.,  $p < 0.05$ )

\*\*Results from quadratic model (which has squared post-policy trend term) were included if quadratic model fits better than linear model.

Appendix Table 3. Summary of Hospital Sector Volume Regression Results by NLEM\*

| Therapeutic Area                | Pre-policy trend | Immediate change after policy | Post-policy trend change |
|---------------------------------|------------------|-------------------------------|--------------------------|
| <b>DIABETES</b>                 |                  |                               |                          |
| <b>Antidiabetics</b>            |                  |                               |                          |
| NLEM**                          | ↑                |                               | ↑                        |
| non-NLEM**                      | ↑                |                               | ↑                        |
| <b>Insulins ***</b>             |                  |                               |                          |
| NLEM**                          | ↑                | ↑                             | ↑                        |
| non-NLEM                        |                  |                               |                          |
| <b>CARDIOVASCULAR DISEASE</b>   |                  |                               |                          |
| <b>Antihypertensives</b>        |                  |                               |                          |
| NLEM                            | ↑                |                               | ↑                        |
| non-NLEM**                      | ↑                |                               | ↑                        |
| <b>Lipid Regulating Agents</b>  |                  |                               |                          |
| NLEM**                          | ↑                |                               | ↑                        |
| non-NLEM**                      | ↑                | ↓                             | ↑                        |
| <b>Cardiac Therapy</b>          |                  |                               |                          |
| NLEM                            | ↑                |                               |                          |
| non-NLEM**                      | ↑                | ↓                             |                          |
| <b>CANCER</b>                   |                  |                               |                          |
| <b>Antineoplastics</b>          |                  |                               |                          |
| NLEM                            | ↑                |                               |                          |
| non-NLEM**                      | ↑                |                               |                          |
| <b>Cytostatic Hormones</b>      |                  |                               |                          |
| NLEM                            | ↑                |                               |                          |
| non-NLEM**                      | ↑                | ↑                             | ↑                        |
| <b>Immunostimulating Agents</b> |                  |                               |                          |
| NLEM**                          | ↑                |                               |                          |
| non-NLEM                        |                  | ↓                             | ↓                        |

\*Arrows signify a statistically significant coefficient ( $p < 0.05$ ) from segmented regression. Volume is population adjusted - denominator is entire population for insulins and over-15 population for rest of therapeutic areas.

\*\*Quadratic model (which has a squared time-after term) fits better than linear model.

Details: - Both after and after-squared terms were significant for insulins, non-NLEM antidiabetics, non-NLEM antihypertensives

- Only after-squared term was significant for NLEM antidiabetics and NLEM lipid regulators

- Only linear after term was significant for non-NLEM immunostimulating agents

- The linear after term for nonNLEM antidiabetics and nonNLEM lipid reg was negative, but the positive after-squared term meant a long-term increase in trend

\*\*\*All insulins are classified as NLEM medicines

Appendix Table 4. Absolute Impact of the Reform on Sales of Medicines by Class (one and five years post-policy)\*

| Therapeutic Class        | One Year Impact (in standard units) |          |                             | Five Year Impact (in standard units) |          |                                  |
|--------------------------|-------------------------------------|----------|-----------------------------|--------------------------------------|----------|----------------------------------|
|                          | Predicted                           | Observed | Absolute Change (95% CI)    | Predicted                            | Observed | Absolute Change (95% CI)         |
| Antidiabetics            | 2602.91                             | 2769.79  | 166.87 (-160.98, 494.73)    | 3669.13                              | 5090.62  | <b>1421.49 (739.57, 2103.42)</b> |
| Insulins                 | 3.30                                | 4.45     | <b>1.15 (0.66, 1.64)</b>    | 4.58                                 | 12.56    | <b>7.98 (6.94, 9.02)</b>         |
| Cardiac Therapy Agents   | 699.28                              | 607.27   | -92.01 (-201.38, 17.36)     | 908.12                               | 825.49   | -82.63 (-309.66, 144.40)         |
| Lipid Regulating Agents  | 522.34                              | 504.58   | -17.76 (-106.50, 70.97)     | 781.97                               | 1629.11  | <b>847.14 (659.98, 1034.30)</b>  |
| Antihypertensives        | 3521.47                             | 3418.79  | -102.68 (-559.16, 353.80)   | 5200.86                              | 6177.49  | <b>976.62 (29.03, 1924.22)</b>   |
| Antineoplastics          | 35.38                               | 34.21    | -1.17 (-5.56, 3.22)         | 46.14                                | 48.13    | 1.99 (-7.13, 11.11)              |
| Cytostatic Hormones      | 29.48                               | 30.58    | 1.10 (-2.85, 5.05)          | 39.82                                | 47.52    | 7.70 (-0.50, 15.89)              |
| Immunostimulating Agents | 0.65                                | 0.43     | <b>-0.23 (-0.32, -0.13)</b> | 0.81                                 | 0.60     | <b>-0.21 (-0.42, -0.01)</b>      |

\***bold** signifies that change is statistically significant (i.e., confidence interval does not include the null value of 0)



Appendix Table 5. Segmented Regression Coefficients: Hospital Market Share\*

|                                            | INTERCEPT | TIME                    | INTERVENTION            | TIME AFTER INTERVENTION  | TIME AFTER INTERVENTION SQUARED** |
|--------------------------------------------|-----------|-------------------------|-------------------------|--------------------------|-----------------------------------|
|                                            | Beta      | Beta (Std. Err.)        | Beta (Std. Err.)        | Beta (Std. Err.)         | Beta (Std. Err.)                  |
| <b>Insulins (Hospital)</b>                 |           |                         |                         |                          |                                   |
| Originator Brand                           | -0.0017   | <b>0.0005 (0.0001)</b>  | -0.0004 (0.0017)        | -0.0003 (0.0003)         | <b>0.0001 (0.0000002)</b>         |
| Branded Generic                            | 0.8934    | 0.0026 (0.0019)         | <b>0.0697 (0.0200)</b>  | <b>-0.0048 (0.0021)</b>  | -                                 |
| Generic                                    | 0.1083    | -0.0030 (0.0019)        | <b>-0.0624 (0.0200)</b> | 0.0031 (0.0021)          | -                                 |
| <b>Antidiabetics (Hospital)</b>            |           |                         |                         |                          |                                   |
| Originator Brand                           | 0.1601    | <b>-0.0049 (0.0006)</b> | -0.0028 (0.0064)        | <b>0.0042 (0.0007)</b>   | -                                 |
| Branded Generic                            | 0.5178    | 0.0010 (0.0016)         | <b>-0.1233 (0.0178)</b> | <b>-0.0045 (0.0017)</b>  | -                                 |
| Generic                                    | 0.0692    | 0.0005 (0.0011)         | <b>-0.0345 (0.0116)</b> | -0.000545 (0.0012)       | -                                 |
| GPO                                        | 0.2505    | 0.0034 (0.0018)         | <b>0.1610 (0.0200)</b>  | 0.000992 (0.0019)        | -                                 |
| <b>Antihypertensives (Hospital)</b>        |           |                         |                         |                          |                                   |
| Originator Brand                           | 0.296     | <b>-0.0066 (0.0008)</b> | -0.0014 (0.0105)        | 0.0034 (0.0019)          | <b>0.0002 (0.00008)</b>           |
| Branded Generic                            | 0.4491    | <b>0.0056 (0.0015)</b>  | -0.0214 (0.0191)        | <b>0.0092 (0.0034)</b>   | <b>-0.0006 (0.0002)</b>           |
| Generic                                    | 0.041     | <b>0.0033 (0.0012)</b>  | <b>-0.0567 (0.0130)</b> | <b>-0.0030 (0.0013)</b>  | -                                 |
| GPO                                        | 0.211     | -0.0020 (0.0024)        | 0.0525 (0.0259)         | -0.0022 (0.0027)         | -                                 |
| <b>Lipid Regulating Agents (Hospital)</b>  |           |                         |                         |                          |                                   |
| Originator Brand                           | 0.5657    | <b>-0.0092 (0.0008)</b> | <b>-0.0776 (0.0116)</b> | <b>-0.0061 (0.0116)</b>  | <b>0.0003 (0.00009)</b>           |
| Branded Generic                            | 0.427     | <b>0.0096 (0.0008)</b>  | <b>0.0755 (0.0118)</b>  | <b>0.0055 (0.0017)</b>   | <b>-0.0003 (0.00009)</b>          |
| Generic                                    | 0.004897  | -0.0003 (0.0002)        | 0.0015 (0.0025)         | 0.0002 (0.0003)          | -                                 |
| GPO                                        | -0.000482 | 0.0001 (0.0003)         | 0.0023 (0.0028)         | -0.0003 (0.0003)         | -                                 |
| <b>Cardiac Therapy (Hospital)</b>          |           |                         |                         |                          |                                   |
| Originator Brand                           | 0.0847    | <b>-0.0014 (0.0004)</b> | 0.0013 (0.0044)         | <b>0.0014 (0.0004)</b>   | -                                 |
| Branded Generic                            | 0.8032    | -0.0023 (0.0026)        | <b>-0.1351 (0.0340)</b> | -0.0093 (0.0061)         | <b>0.0006 (0.0003)</b>            |
| Generic                                    | 0.005095  | <b>0.0031 (0.0009)</b>  | <b>-0.0426 (0.0093)</b> | <b>-0.0030 (0.0010)</b>  | -                                 |
| GPO                                        | 0.0751    | 0.0015 (0.0030)         | <b>0.2155 (0.0319)</b>  | -0.0010 (0.0033)         | -                                 |
| <b>Antineoplastics (Hospital)</b>          |           |                         |                         |                          |                                   |
| Originator Brand                           | 0.1554    | 0.0015 (0.0009)         | 0.0110 (0.0103)         | -0.0014 (0.0010)         | -                                 |
| Branded Generic                            | 0.5518    | -0.0011 (0.0020)        | -0.0100 (0.0216)        | 0.0011 (0.0022)          | -                                 |
| Generic                                    | 0.2862    | -0.0004 (0.0014)        | 0.0037 (0.0149)         | 0.0002 (0.0015)          | -                                 |
| <b>Cytostatic Hormones (Hospital)</b>      |           |                         |                         |                          |                                   |
| Originator Brand                           | 0.4664    | -0.0032 (0.0022)        | 0.0038 (0.0280)         | <b>-0.0127 (0.0050)</b>  | <b>0.0007 (0.0002)</b>            |
| Branded Generic                            | 0.5141    | <b>0.0036 (0.0015)</b>  | <b>-0.0773 (0.0206)</b> | <b>0.0195 (0.0035)</b>   | <b>-0.0013 (0.0002)</b>           |
| Generic                                    | 0.0144    | 0.0004 (0.0017)         | <b>0.0600 (0.0224)</b>  | -0.0060 (0.0040)         | <b>0.0005 (0.0002)</b>            |
| <b>Immunostimulating Agents (Hospital)</b> |           |                         |                         |                          |                                   |
| Originator Brand                           | 0.9742    | 0.0007 (0.0015)         | <b>-0.0636 (0.0162)</b> | <b>-0.0113 (0.0017)</b>  | -                                 |
| Branded Generic                            | -0.000536 | 0.0001 (0.0013)         | <b>0.0450 (0.0137)</b>  | <b>0.0108 (0.0014)</b>   | -                                 |
| Generic                                    | -0.000986 | <b>0.0002 (0.0001)</b>  | -0.0016 (0.0009)        | <b>-0.0003 (0.00009)</b> | -                                 |

\* **Bold** signifies statistically significant coefficient (i.e.,  $p < 0.05$ )

\*\*Results from quadratic model (which has squared post-policy trend term) were included if quadratic model fits better than linear model.

Appendix Table 6. Absolute Impact of the Reform on Sales of Licensing Status Market Share by Class (one and five years post-policy)\*

| Therapeutic Class               | One Year Impact (in % market share) |          |                                   | Five Year Impact (in % market share) |          |                                   |
|---------------------------------|-------------------------------------|----------|-----------------------------------|--------------------------------------|----------|-----------------------------------|
|                                 | Predicted                           | Observed | Relative Change (95% CI)          | Predicted                            | Observed | Relative Change (95% CI)          |
| <b>Antidiabetics</b>            |                                     |          |                                   |                                      |          |                                   |
| Original/Licensed               | 0.0672                              | 0.0813   | 0.0140 (-0.0016, 0.0297)          | -0.0061                              | 0.0712   | <b>0.0773 (0.0448, 0.1098)</b>    |
| Other                           | 0.5371                              | 0.3960   | <b>-0.1412 (-0.1851, -0.0972)</b> | 0.5524                               | 0.3443   | <b>-0.2080 (-0.2966, -0.1195)</b> |
| Unbranded                       | 0.0788                              | 0.0421   | <b>-0.0367 (-0.0652, -0.0082)</b> | 0.0864                               | 0.0415   | -0.0449 (-0.1041, 0.0144)         |
| GPO                             | 0.3142                              | 0.4792   | <b>0.1649 (0.1156, 0.2143)</b>    | 0.3645                               | 0.5444   | <b>0.1798 (0.0805, 0.2792)</b>    |
|                                 |                                     |          |                                   |                                      |          |                                   |
| <b>Insulins</b>                 |                                     |          |                                   |                                      |          |                                   |
| Originator Brand                | 0.0079                              | 0.0081   | 0.0002 (-0.0035, 0.0038)          | 0.0156                               | 0.0461   | <b>0.0305 (0.0228, 0.0382)</b>    |
| Branded Generic                 | 0.9419                              | 0.9925   | <b>0.0505 (0.0010, 0.1000)</b>    | 0.9802                               | 0.9590   | -0.0212 (-0.1240, 0.0815)         |
| Generic                         | 0.0501                              | 0.0000   | <b>-0.0501 (-0.0994, -0.0008)</b> | 0.0042                               | 0.0000   | -0.0042 (-0.1065, 0.0982)         |
|                                 |                                     |          |                                   |                                      |          |                                   |
| <b>Antihypertensives</b>        |                                     |          |                                   |                                      |          |                                   |
| Originator Brand                | 0.1697                              | 0.1850   | 0.0153 (-0.0063, 0.0368)          | 0.0700                               | 0.2010   | <b>0.1310 (0.0854, 0.1765)</b>    |
| Branded Generic                 | 0.5557                              | 0.5619   | 0.0062 (-0.0330, 0.0454)          | 0.6398                               | 0.5890   | -0.0507 (-0.1333, 0.0319)         |
| Generic                         | 0.1029                              | 0.0341   | <b>-0.0688 (-0.1009, -0.0368)</b> | 0.1519                               | 0.0373   | <b>-0.1145 (-0.1811, -0.0480)</b> |
| GPO                             | 0.1725                              | 0.2160   | 0.0435 (-0.0203, 0.1074)          | 0.1420                               | 0.1520   | 0.0100 (-0.1225, 0.1425)          |
|                                 |                                     |          |                                   |                                      |          |                                   |
| <b>Cardiac Therapy</b>          |                                     |          |                                   |                                      |          |                                   |
| Originator Brand                | 0.0588                              | 0.0656   | 0.0068 (-0.0041, 0.0176)          | 0.0384                               | 0.0655   | <b>0.0271 (0.0049, 0.0493)</b>    |
| Branded Generic                 | 0.7594                              | 0.5961   | <b>-0.1633 (-0.2332, -0.0935)</b> | 0.7594                               | 0.5961   | <b>-0.1633 (-0.2332, -0.0935)</b> |
| Generic                         | 0.1116                              | 0.0113   | <b>-0.1002 (-0.1477, -0.0528)</b> | 0.1116                               | 0.0113   | <b>-0.1002 (-0.1477, -0.0528)</b> |
| GPO                             | 0.1034                              | 0.3149   | <b>0.2115 (0.1329, 0.2901)</b>    | 0.1034                               | 0.3149   | <b>0.2115 (0.1329, 0.2901)</b>    |
|                                 |                                     |          |                                   |                                      |          |                                   |
| <b>Lipid Regulators</b>         |                                     |          |                                   |                                      |          |                                   |
| Originator Brand                | 0.3905                              | 0.2942   | <b>-0.0963 (-0.1187, -0.0739)</b> | 0.2522                               | 0.1838   | <b>-0.0684 (-0.1158, -0.0210)</b> |
| Branded Generic                 | 0.6086                              | 0.7010   | <b>0.0924 (0.0697, 0.1151)</b>    | 0.7519                               | 0.8159   | <b>0.0640 (0.0160, 0.1119)</b>    |
| Generic                         | -0.0009                             | 0.0015   | 0.0024 (-0.0038, 0.0085)          | -0.0054                              | 0.0004   | 0.0058 (-0.0070, 0.0186)          |
| GPO                             | 0.0022                              | 0.0033   | 0.0011 (-0.0058, 0.0079)          | 0.0044                               | 0.0008   | -0.0035 (-0.0177, 0.0106)         |
|                                 |                                     |          |                                   |                                      |          |                                   |
| <b>Antineoplastics</b>          |                                     |          |                                   |                                      |          |                                   |
| Originator Brand                | 0.1840                              | 0.1894   | 0.0054 (-0.0201, 0.0308)          | 0.2066                               | 0.1908   | -0.0158 (-0.0675, 0.0359)         |
| Branded Generic                 | 0.5308                              | 0.5252   | -0.0056 (-0.0587, 0.0476)         | 0.5142                               | 0.5252   | 0.0110 (-0.0993, 0.1214)          |
| Generic                         | 0.2783                              | 0.2827   | 0.0044 (-0.0323, 0.0412)          | 0.2721                               | 0.2793   | 0.0072 (-0.0690, 0.0835)          |
|                                 |                                     |          |                                   |                                      |          |                                   |
| <b>Cytostatic Hormones</b>      |                                     |          |                                   |                                      |          |                                   |
| Originator Brand                | 0.4058                              | 0.3704   | -0.0353 (-0.0928, 0.0222)         | 0.3579                               | 0.3803   | 0.0224 (-0.0988, 0.1437)          |
| Branded Generic                 | 0.5821                              | 0.5626   | -0.0195 (-0.0609, 0.0218)         | 0.6358                               | 0.4764   | <b>-0.1595 (-0.2463, -0.0727)</b> |
| Generic                         | 0.0221                              | 0.0653   | 0.0432 (-0.0029, 0.0893)          | 0.0282                               | 0.1393   | <b>0.1112 (0.0140, 0.2083)</b>    |
|                                 |                                     |          |                                   |                                      |          |                                   |
| <b>Immunostimulating Agents</b> |                                     |          |                                   |                                      |          |                                   |
| Originator Brand                | 0.9875                              | 0.8787   | <b>-0.1087 (-0.1488, -0.0687)</b> | 0.9979                               | 0.7198   | <b>-0.2781 (-0.3612, -0.1951)</b> |
| Branded Generic                 | 0.0018                              | 0.0902   | <b>0.0884 (0.0546, 0.1221)</b>    | 0.0037                               | 0.2546   | <b>0.2509 (0.1808, 0.3210)</b>    |
| Generic                         | 0.0036                              | 0.0007   | <b>-0.0028 (-0.0050, -0.0007)</b> | 0.0071                               | -0.0003  | <b>-0.0074 (-0.0120, -0.0029)</b> |

\*bold signifies that change is statistically significant (i.e., confidence interval does not include the null value of 0)

**Appendix Figure 1. Standard Units Per Capita by Quarter**  
**Insulin (Hospital vs. Retail)**

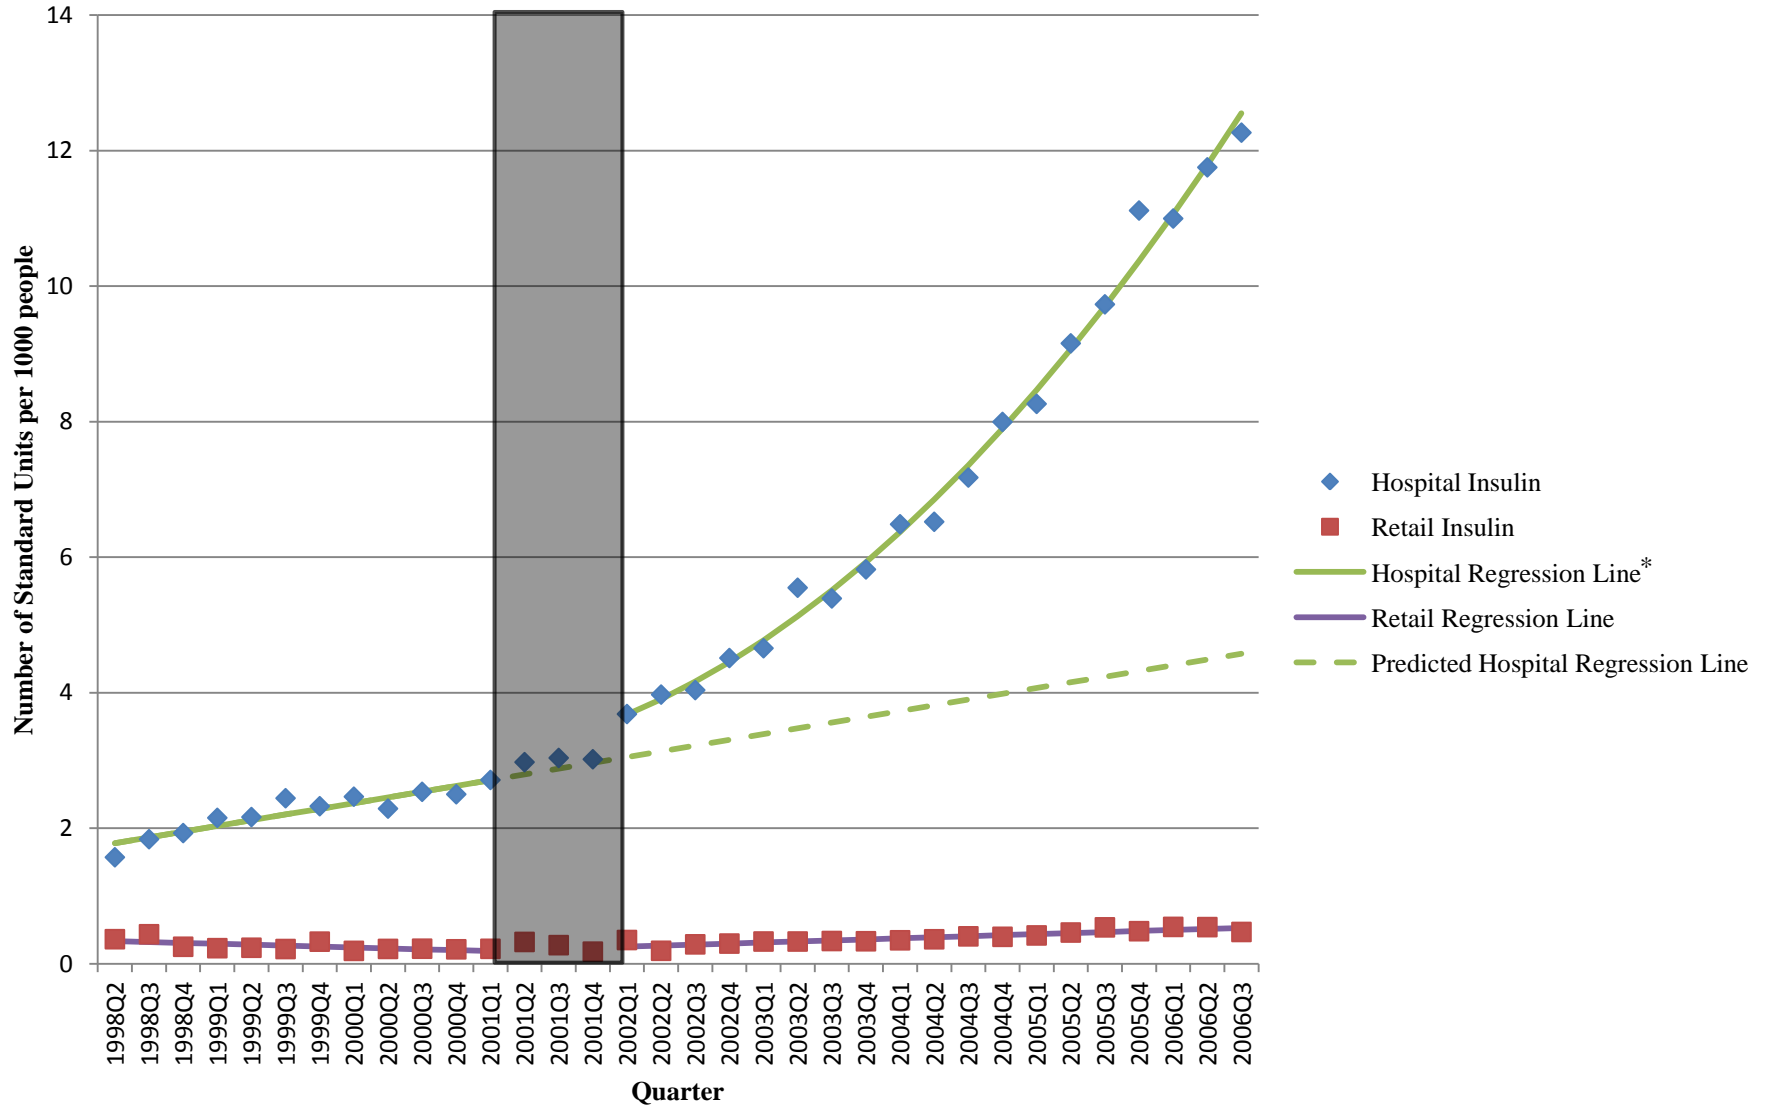

\*Results from quadratic model

### Appendix Figure 2. Standard Units Per Capita by Quarter Antidiabetics (Hospital vs. Retail)

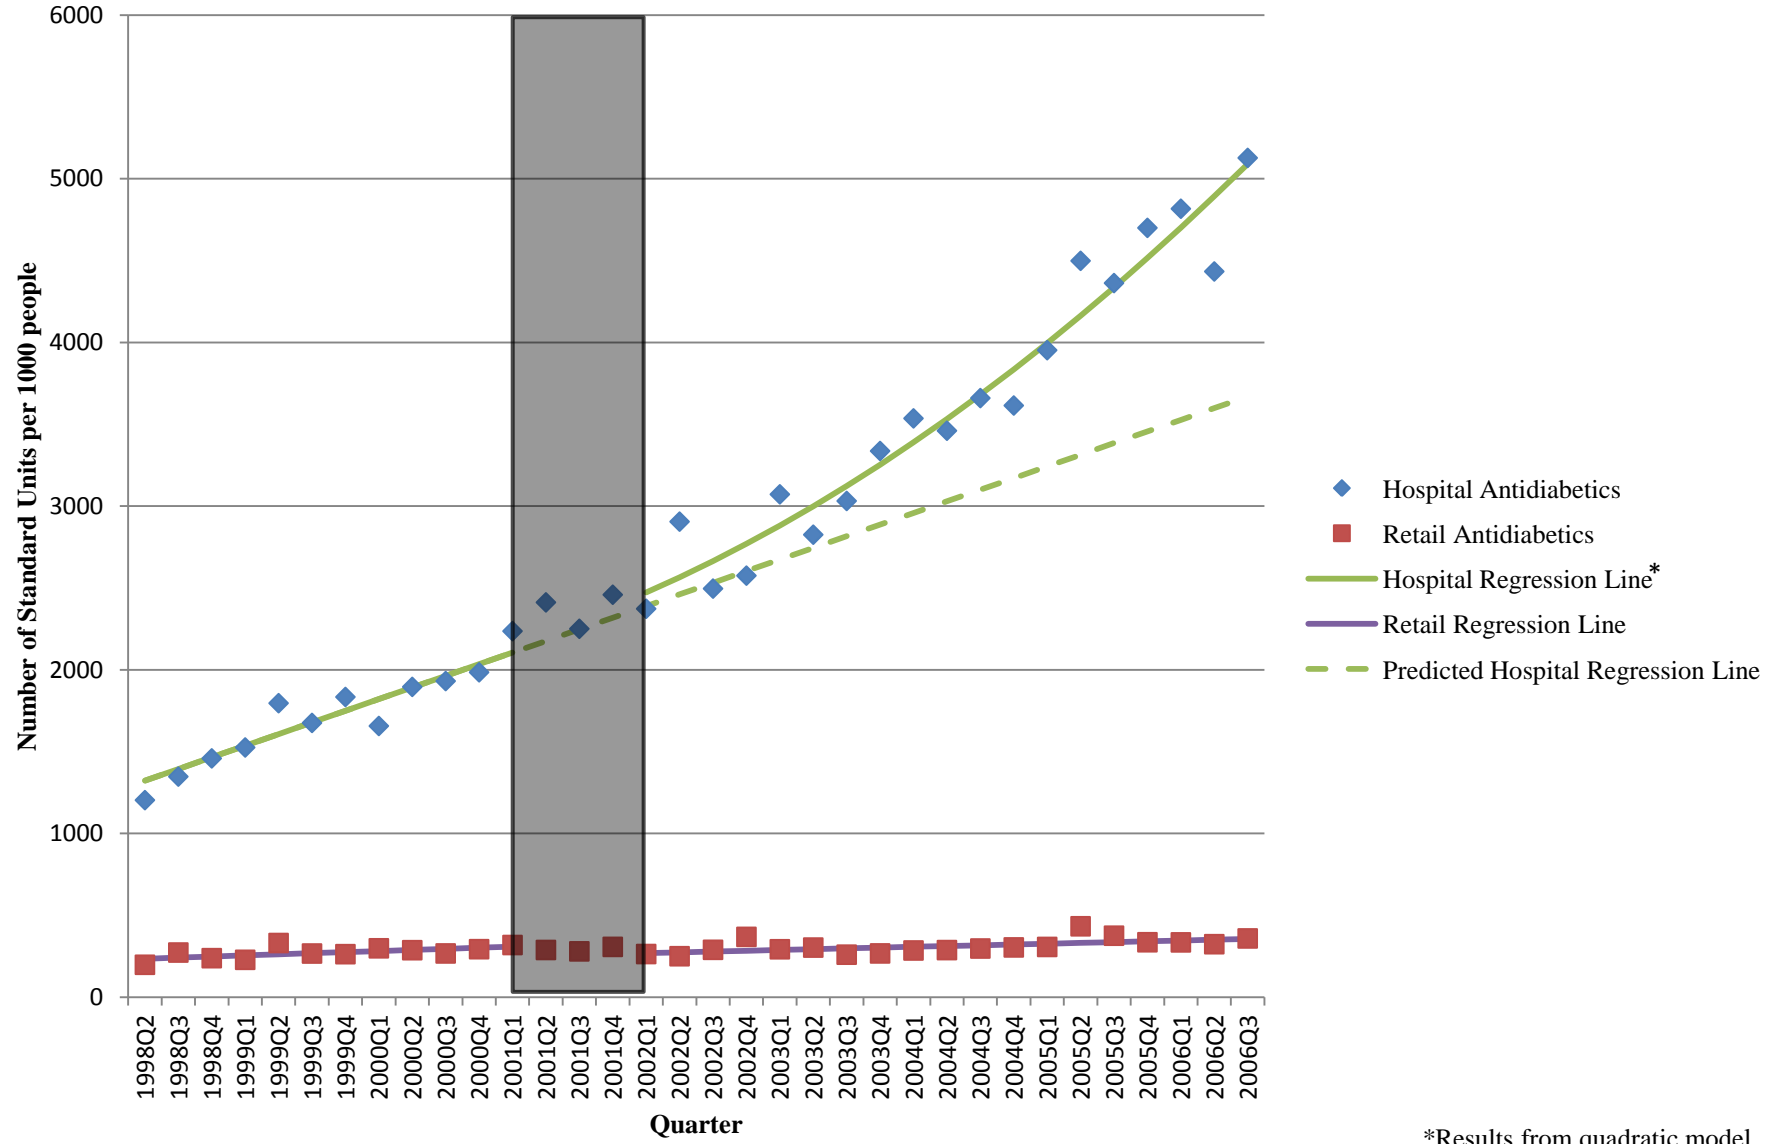

\*Results from quadratic model

**Appendix Figure 3. Standard Units Per Capita by Quarter**  
**Cardiac Therapy (Hospital vs. Retail)**

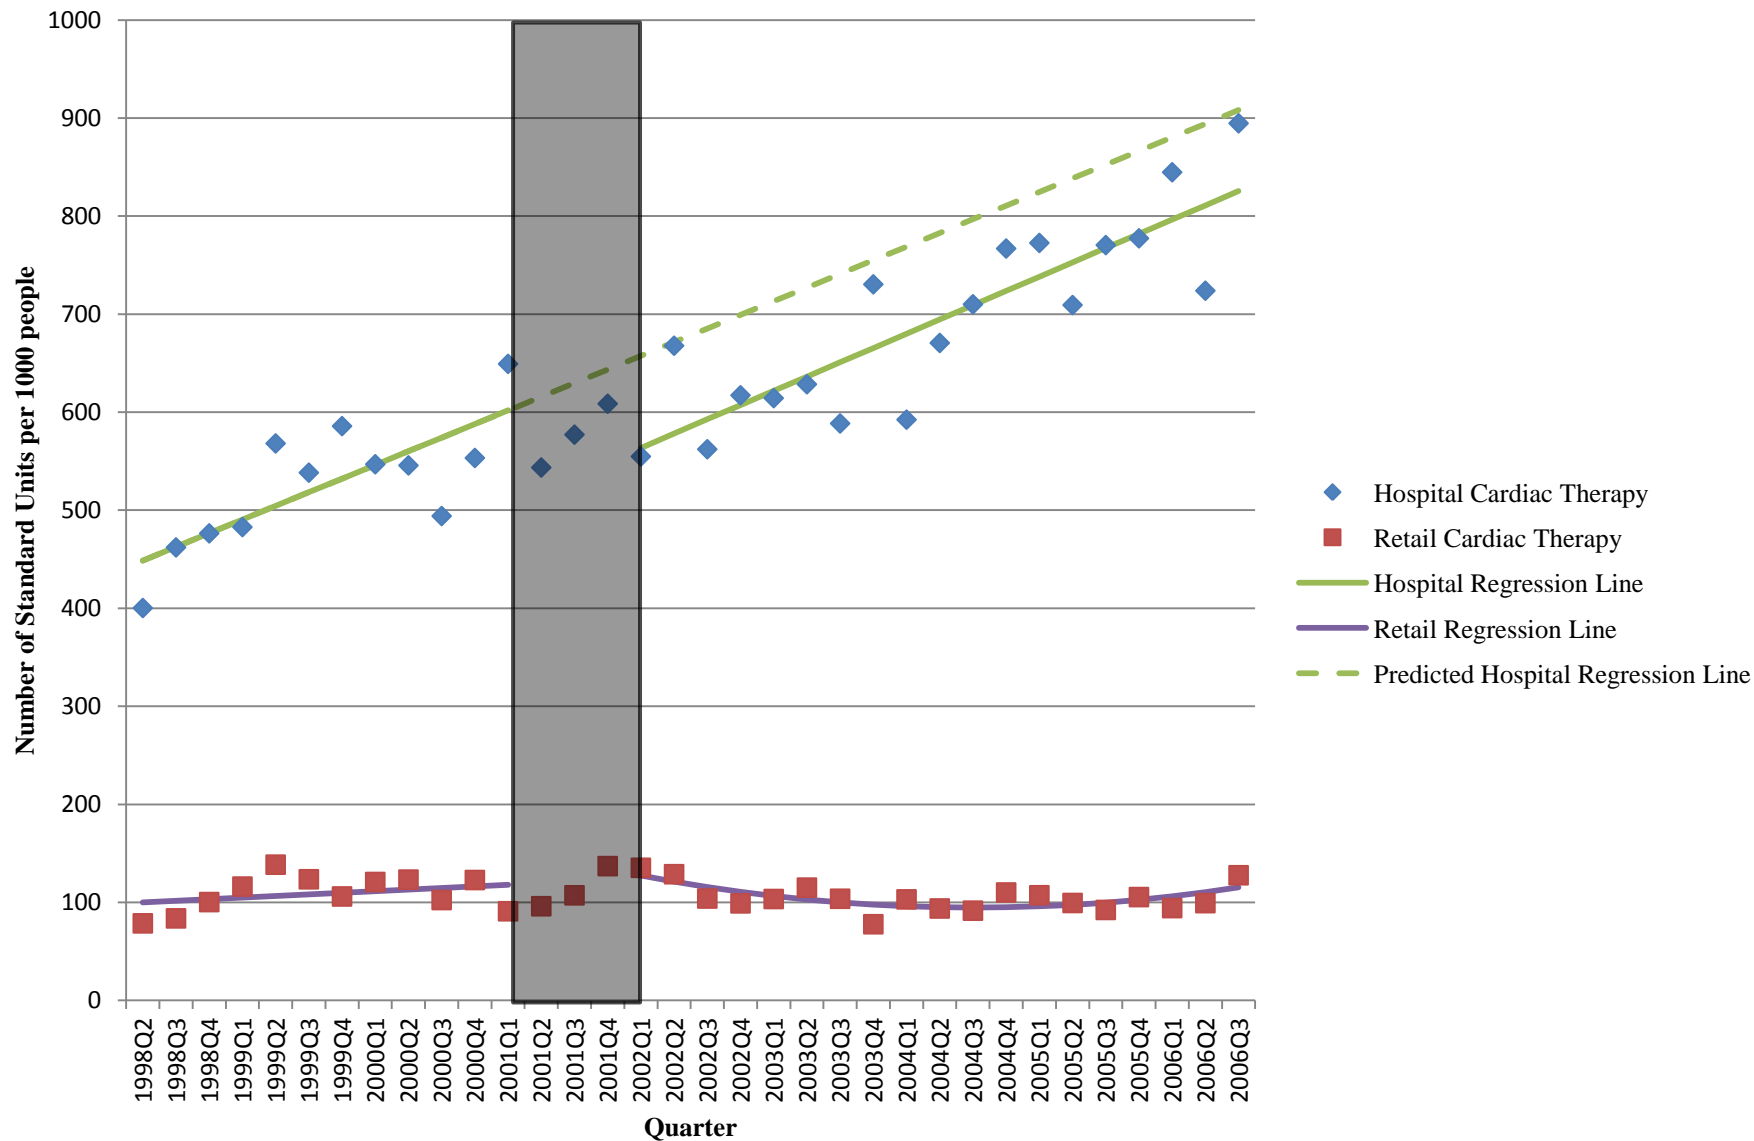

### Appendix Figure 4. Standard Units Per Capita by Quarter Lipid Regulating Agents (Hospital vs. Retail)

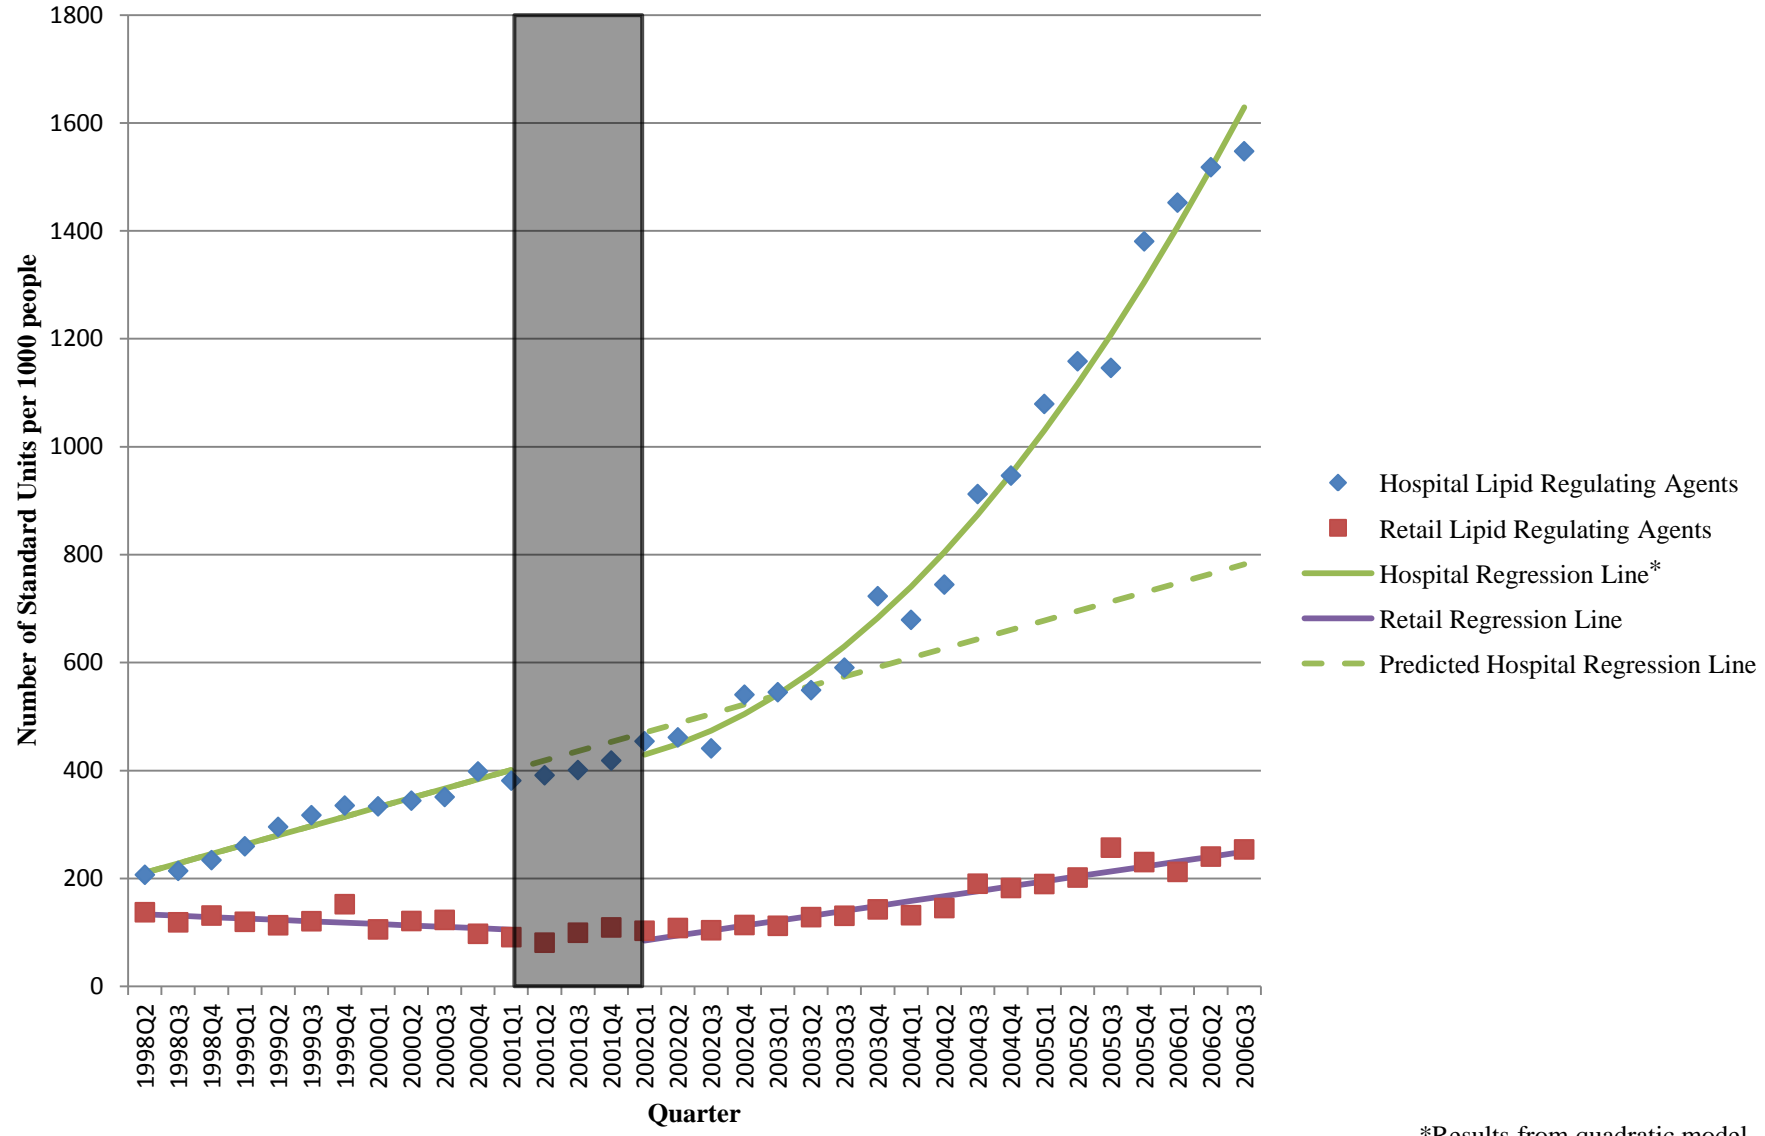

\*Results from quadratic model

**Appendix Figure 5. Standard Units Per Capita by Quarter**  
**Antihypertensives (Hospital vs. Retail)**

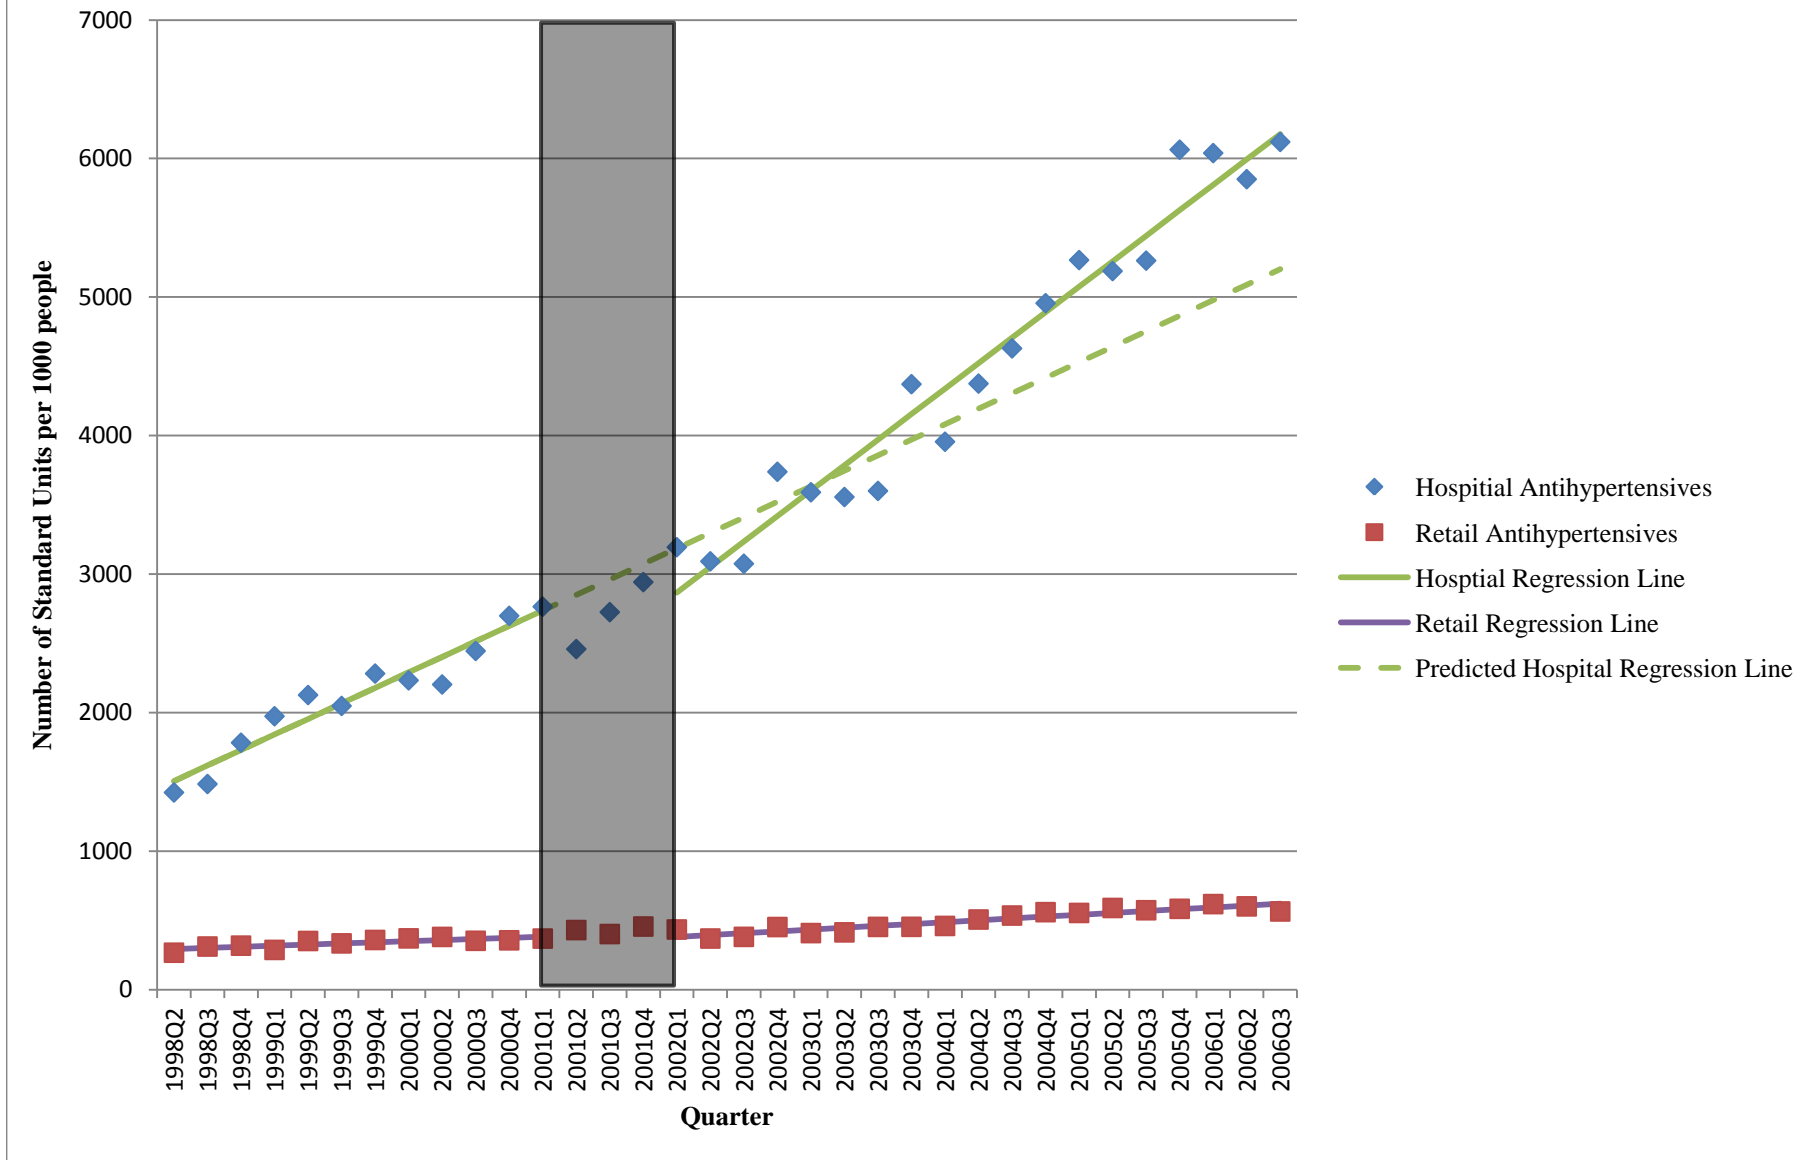

### Appendix Figure 6. Standard Units Per Capita by Quarter Antineoplastics (Hospital vs. Retail)

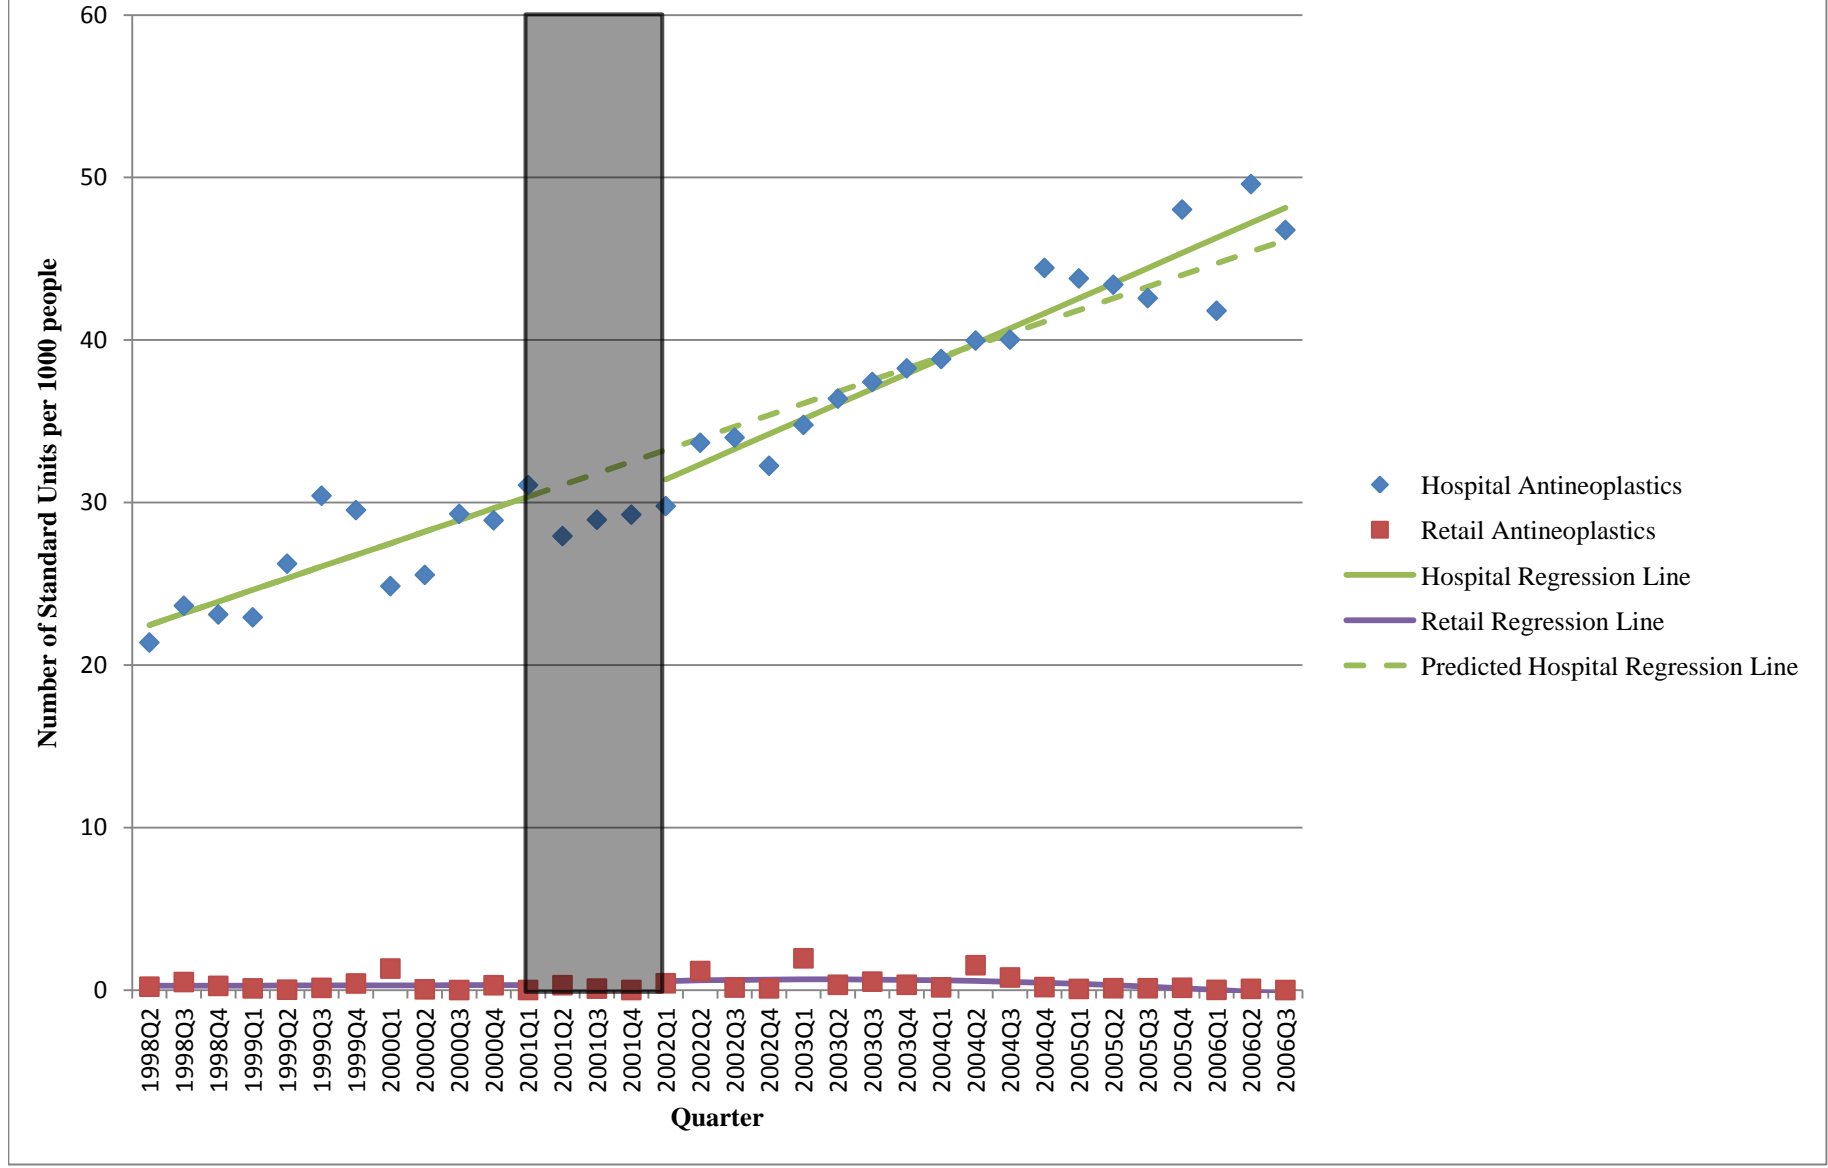



**Appendix Figure 7. Standard Units Per Capita by Quarter**  
**Cytostatic Hormones (Hospital vs. Retail)**

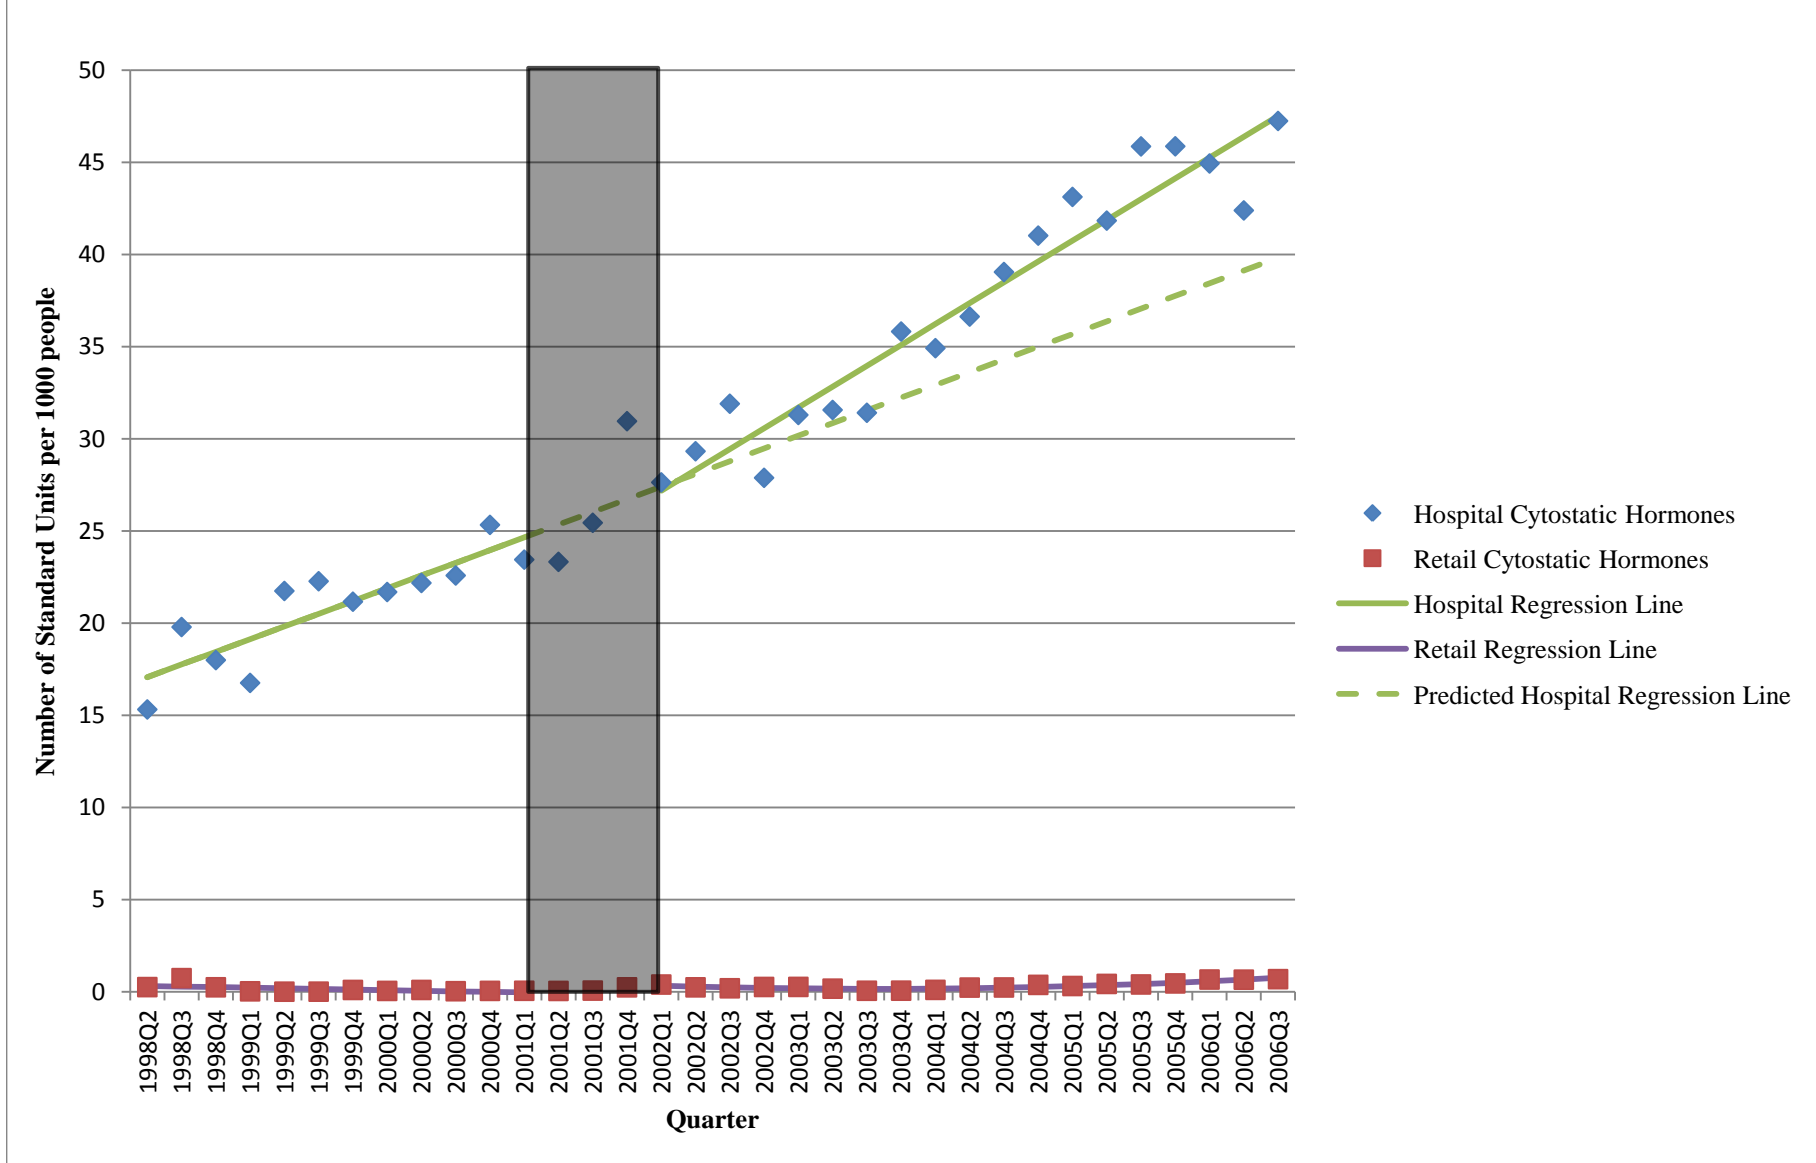

### Appendix Figure 8. Standard Units Per Capita by Quarter Immunostimulating Agents (Hospital vs. Retail)

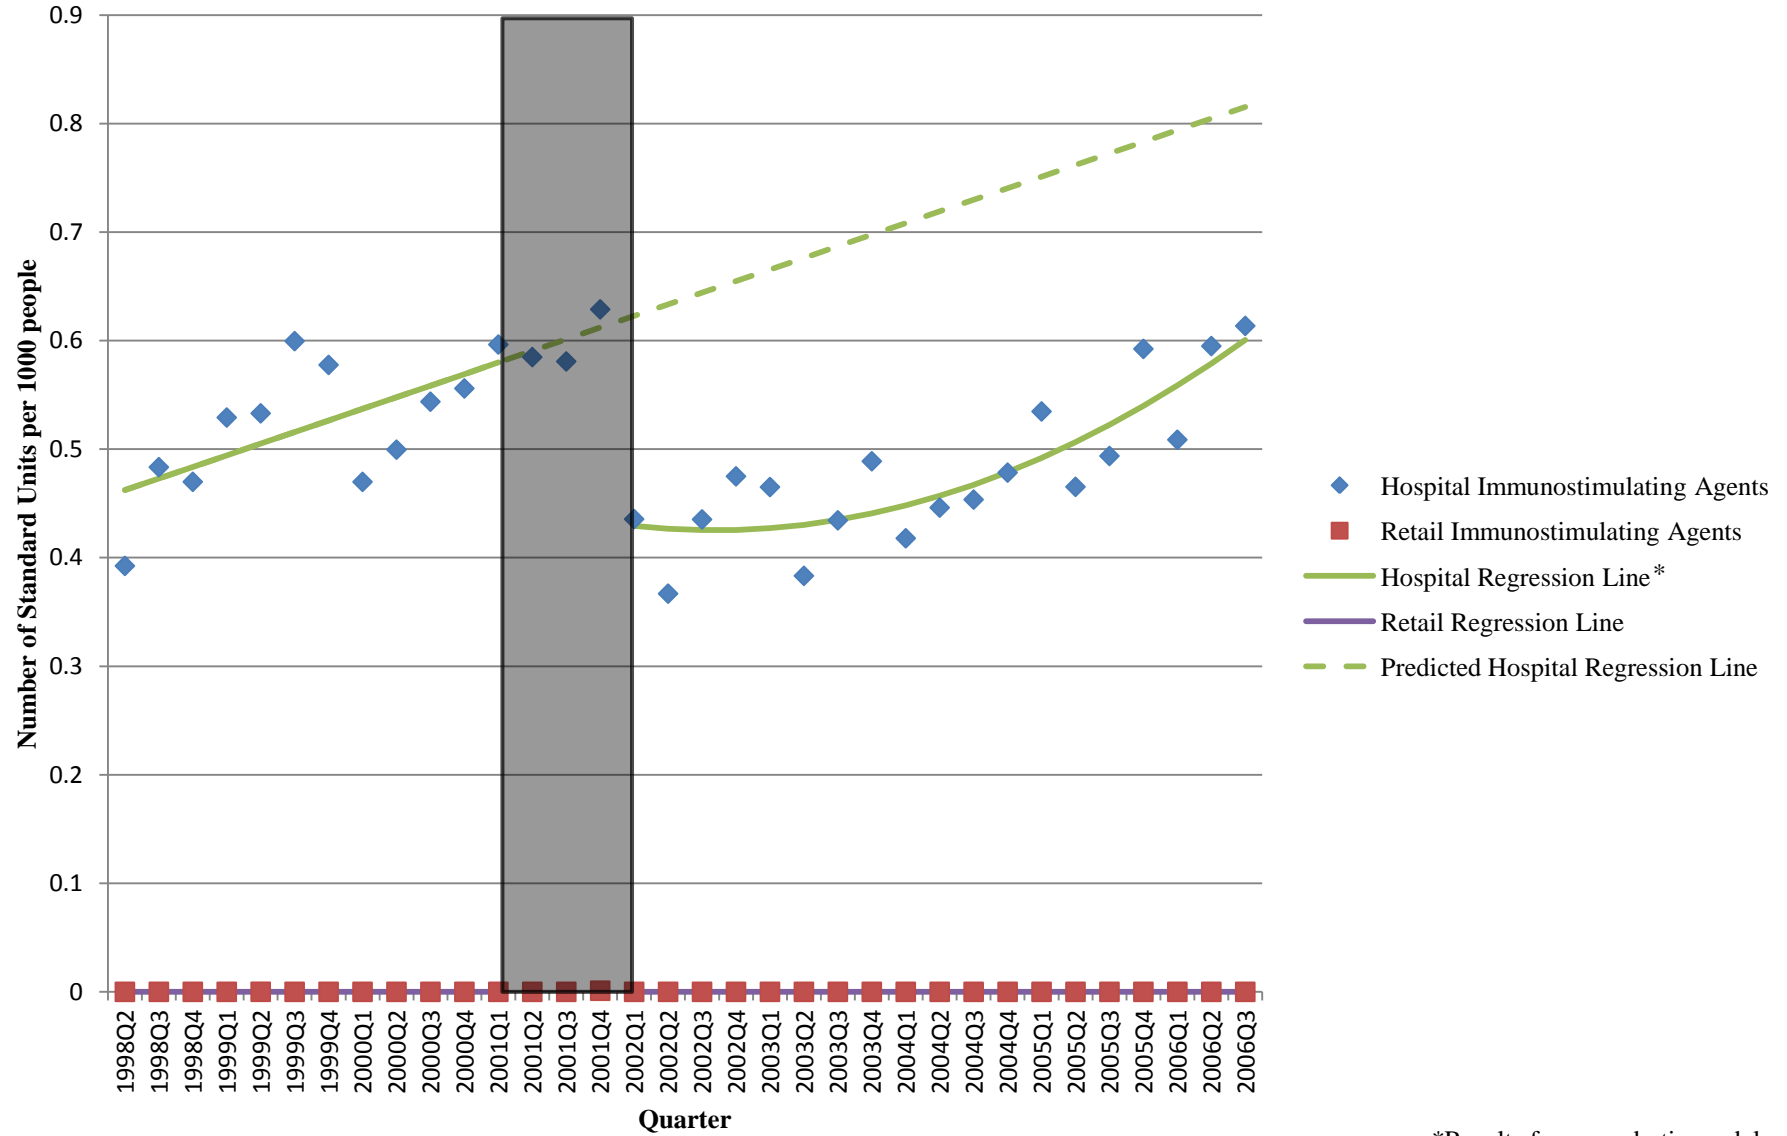

\*Results from quadratic model

**Appendix Figure 9. Licensing Status Market Share by Quarter**  
**Insulin (Hospital Sector)**

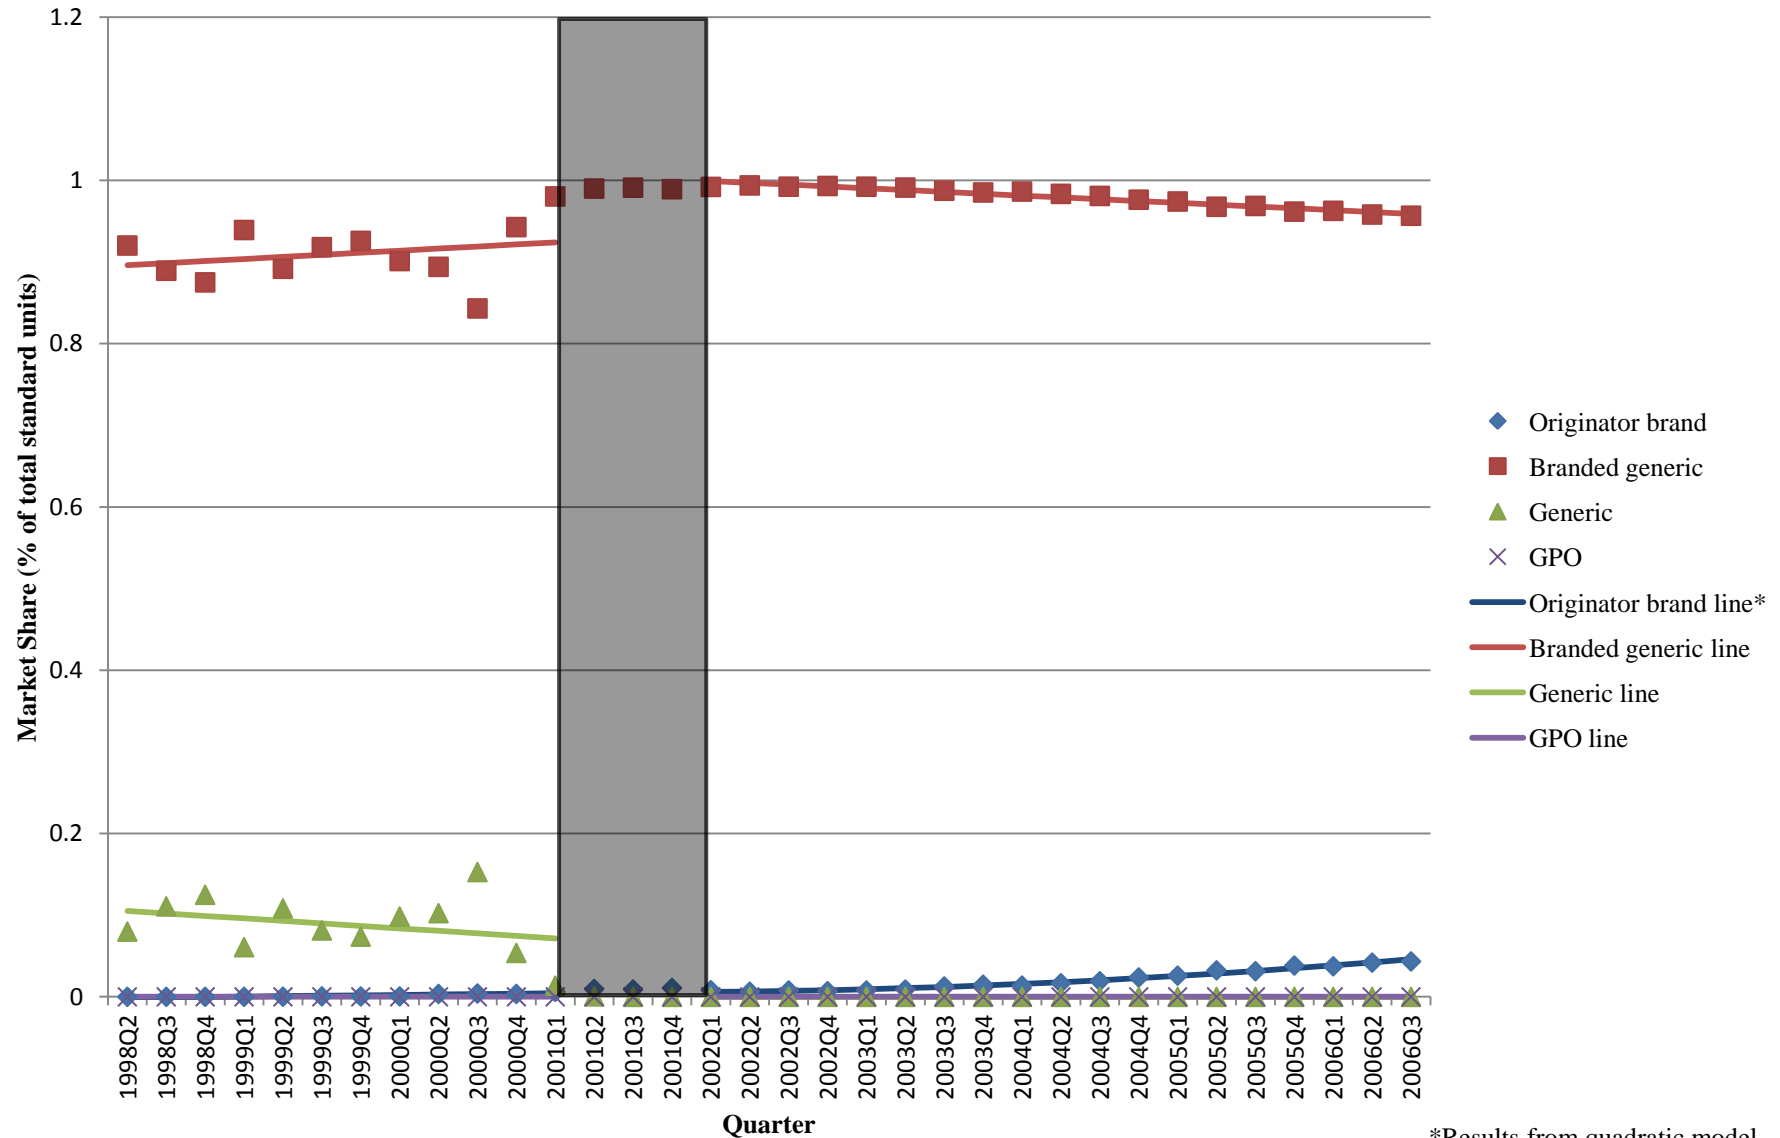

\*Results from quadratic model

Appendix Figure 10. Licensing Status Market Share by Quarter  
Antidiabetics (Hospital Sector)

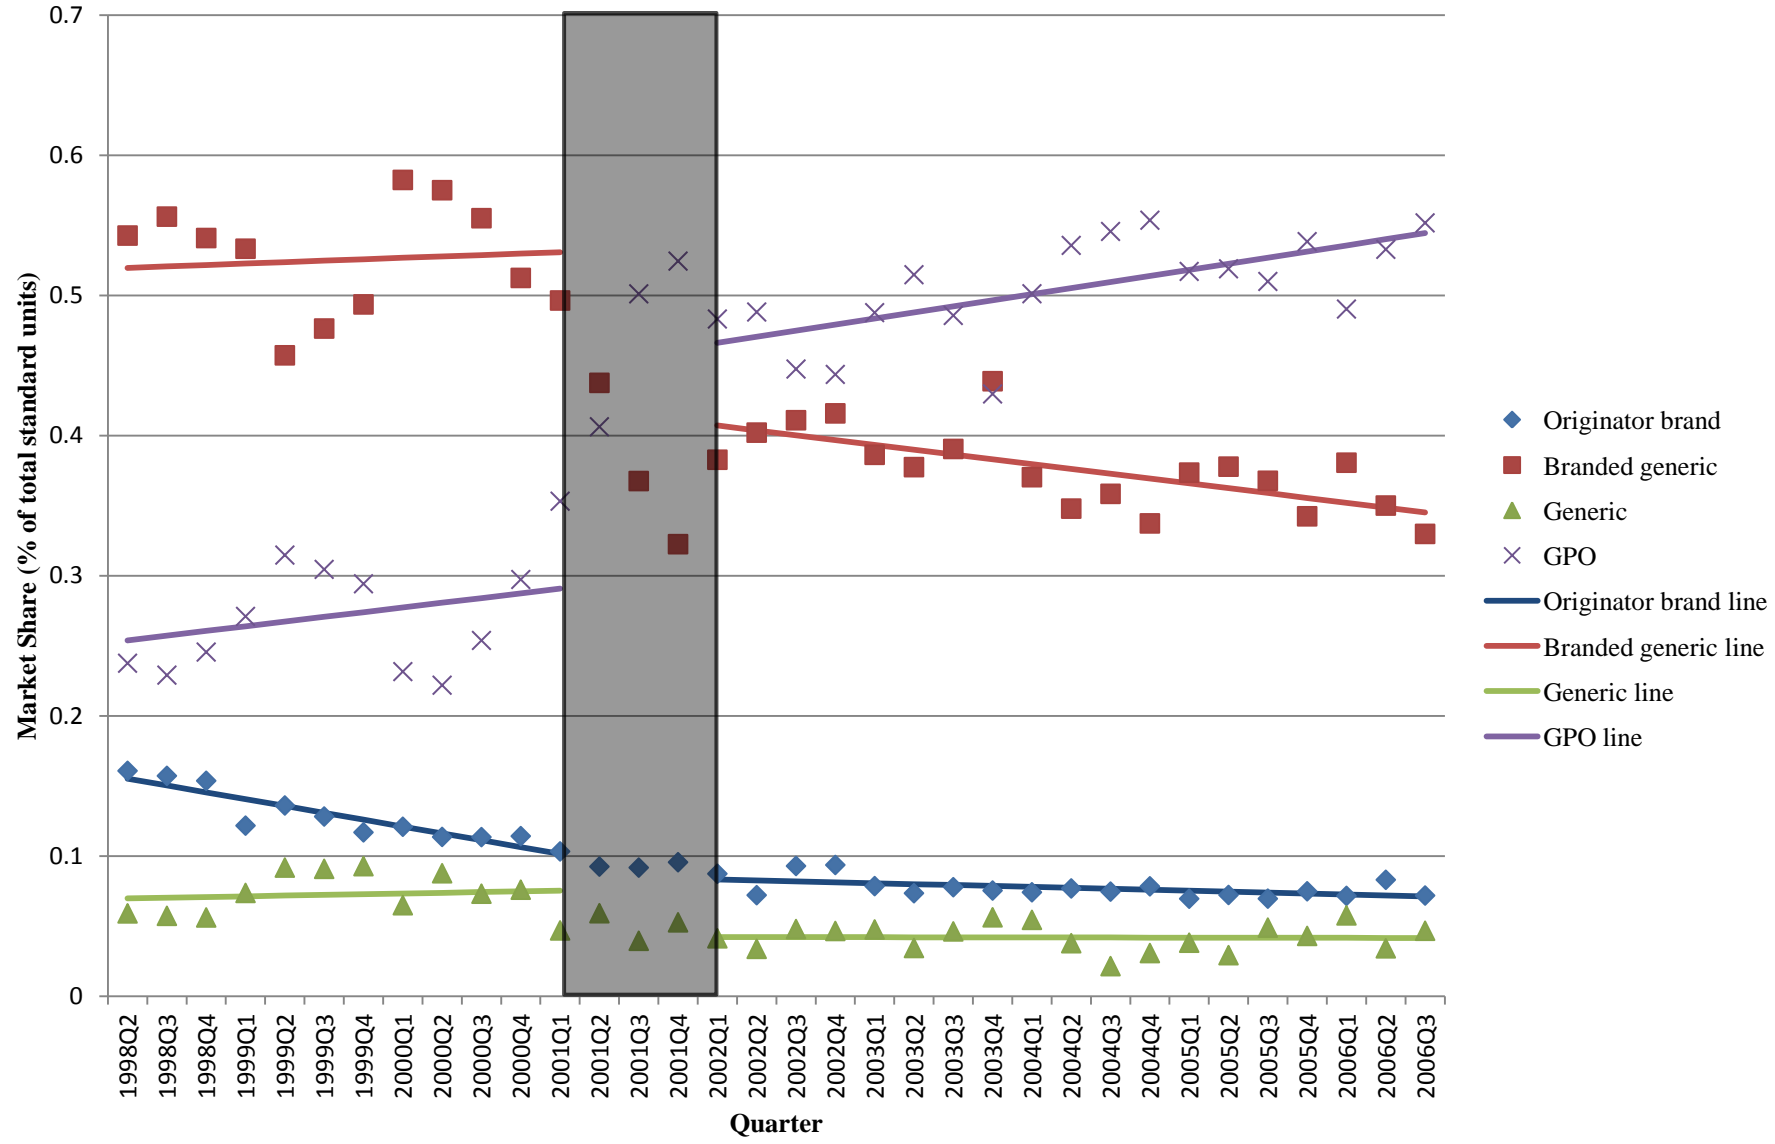

**Appendix Figure 11. Licensing Status Market Share by Quarter**  
**Cardiac Therapy Agents (Hospital Sector)**

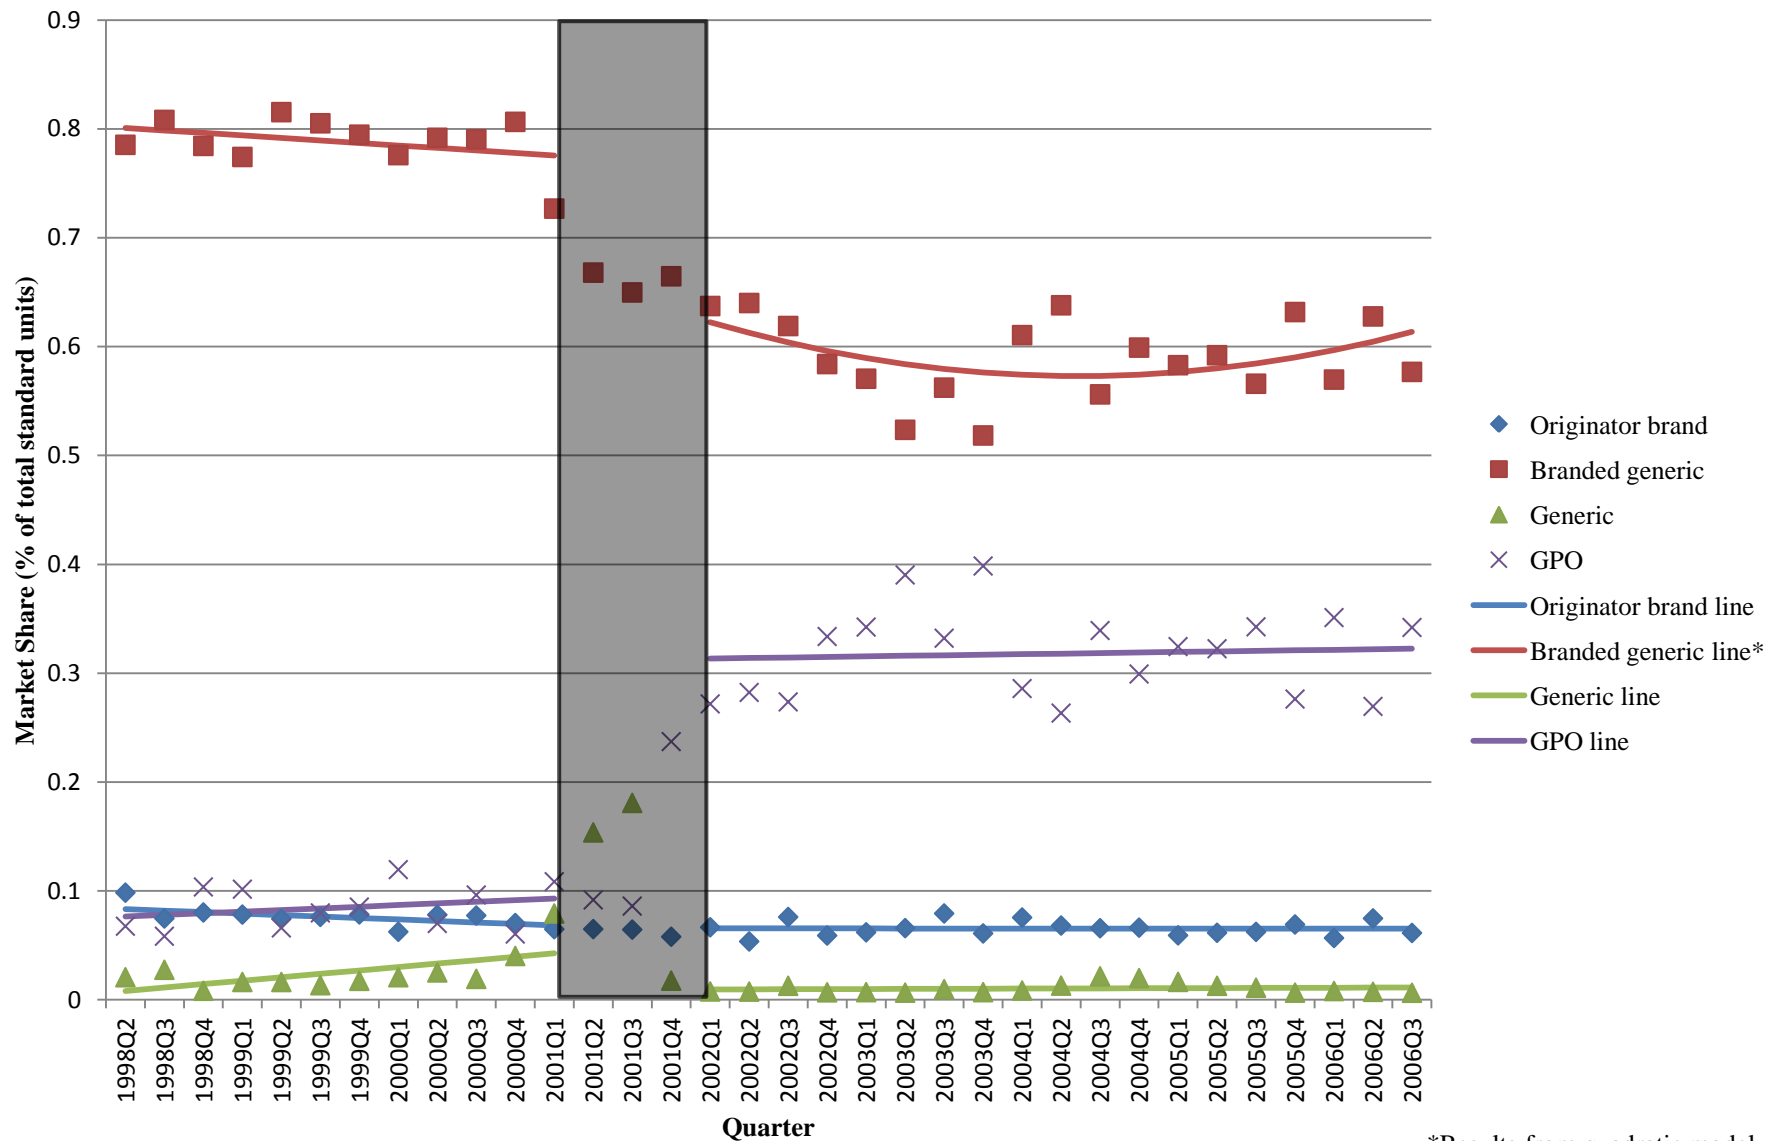

\*Results from quadratic model

### Appendix Figure 12. Licensing Status Market Share by Quarter Lipid Regulating Agents (Hospital Sector)

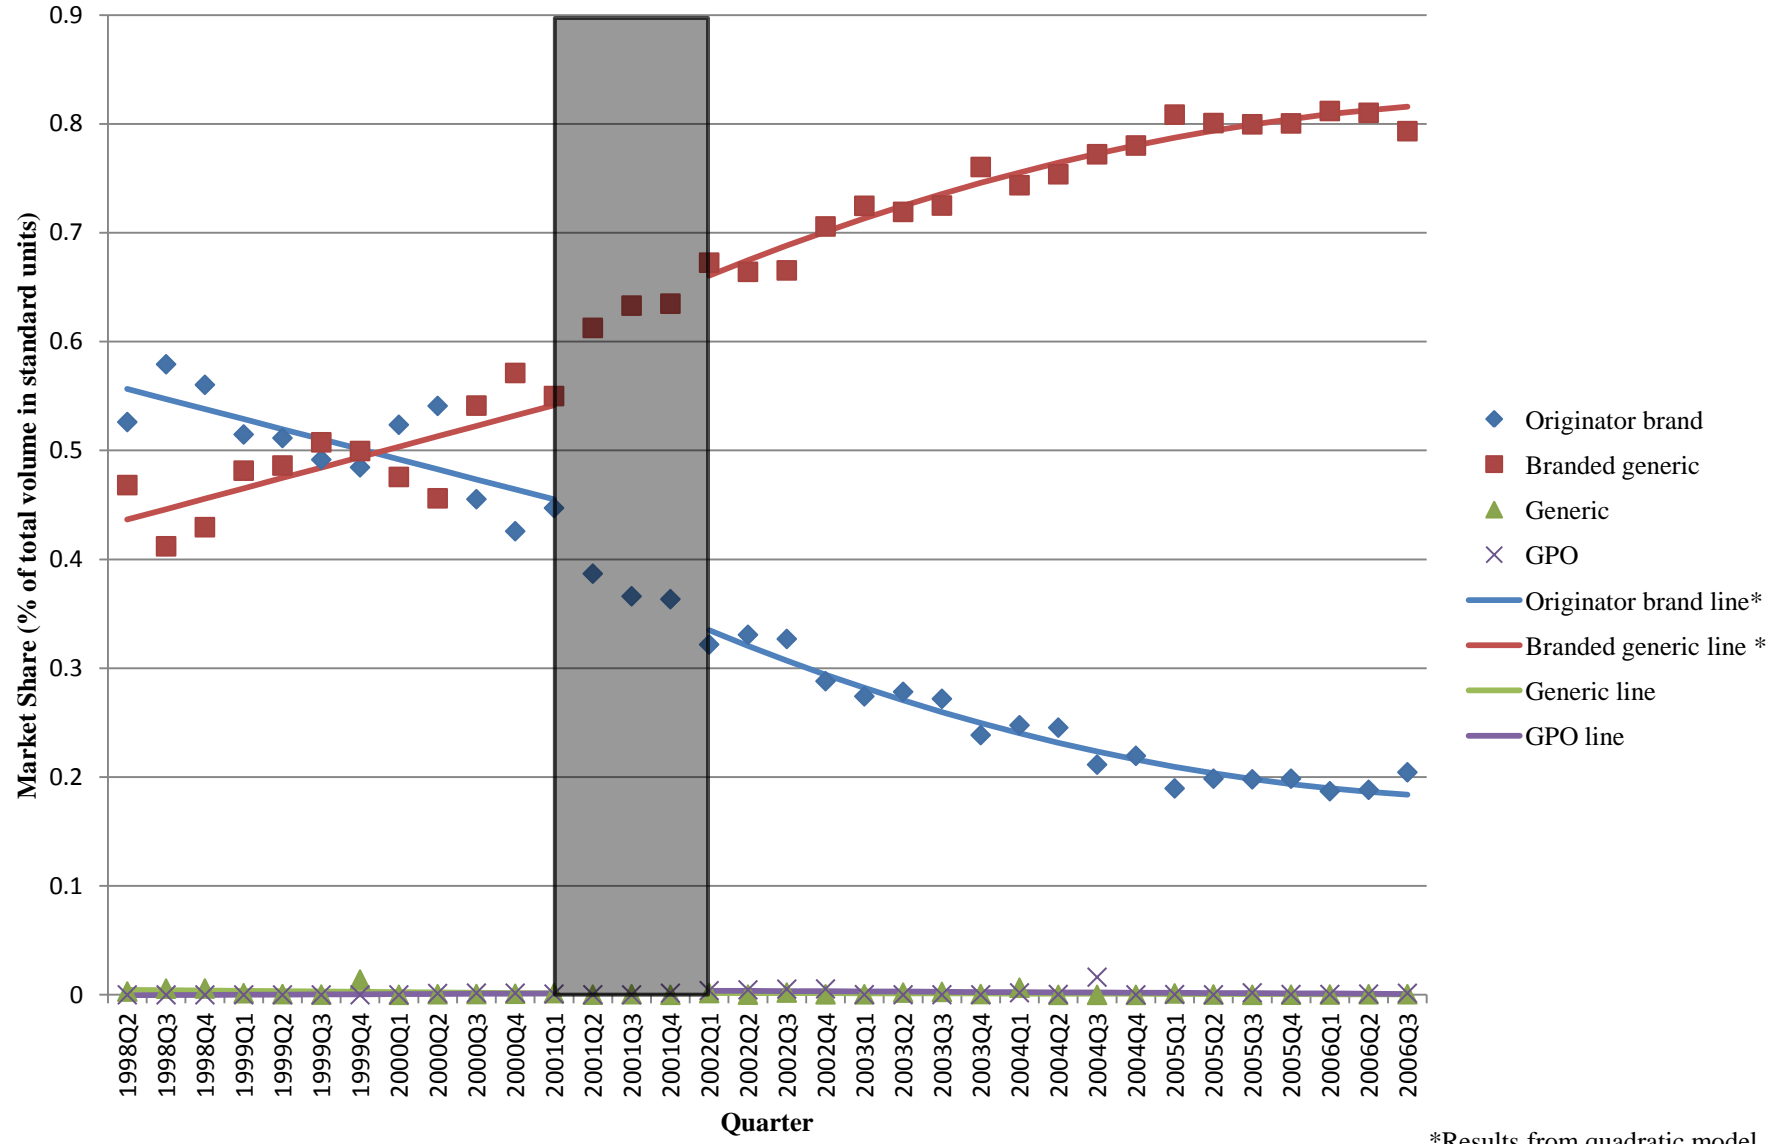

\*Results from quadratic model

**Appendix Figure 13. Licensing Status Market Share by Quarter**  
**Antihypertensives (Hospital Sector)**

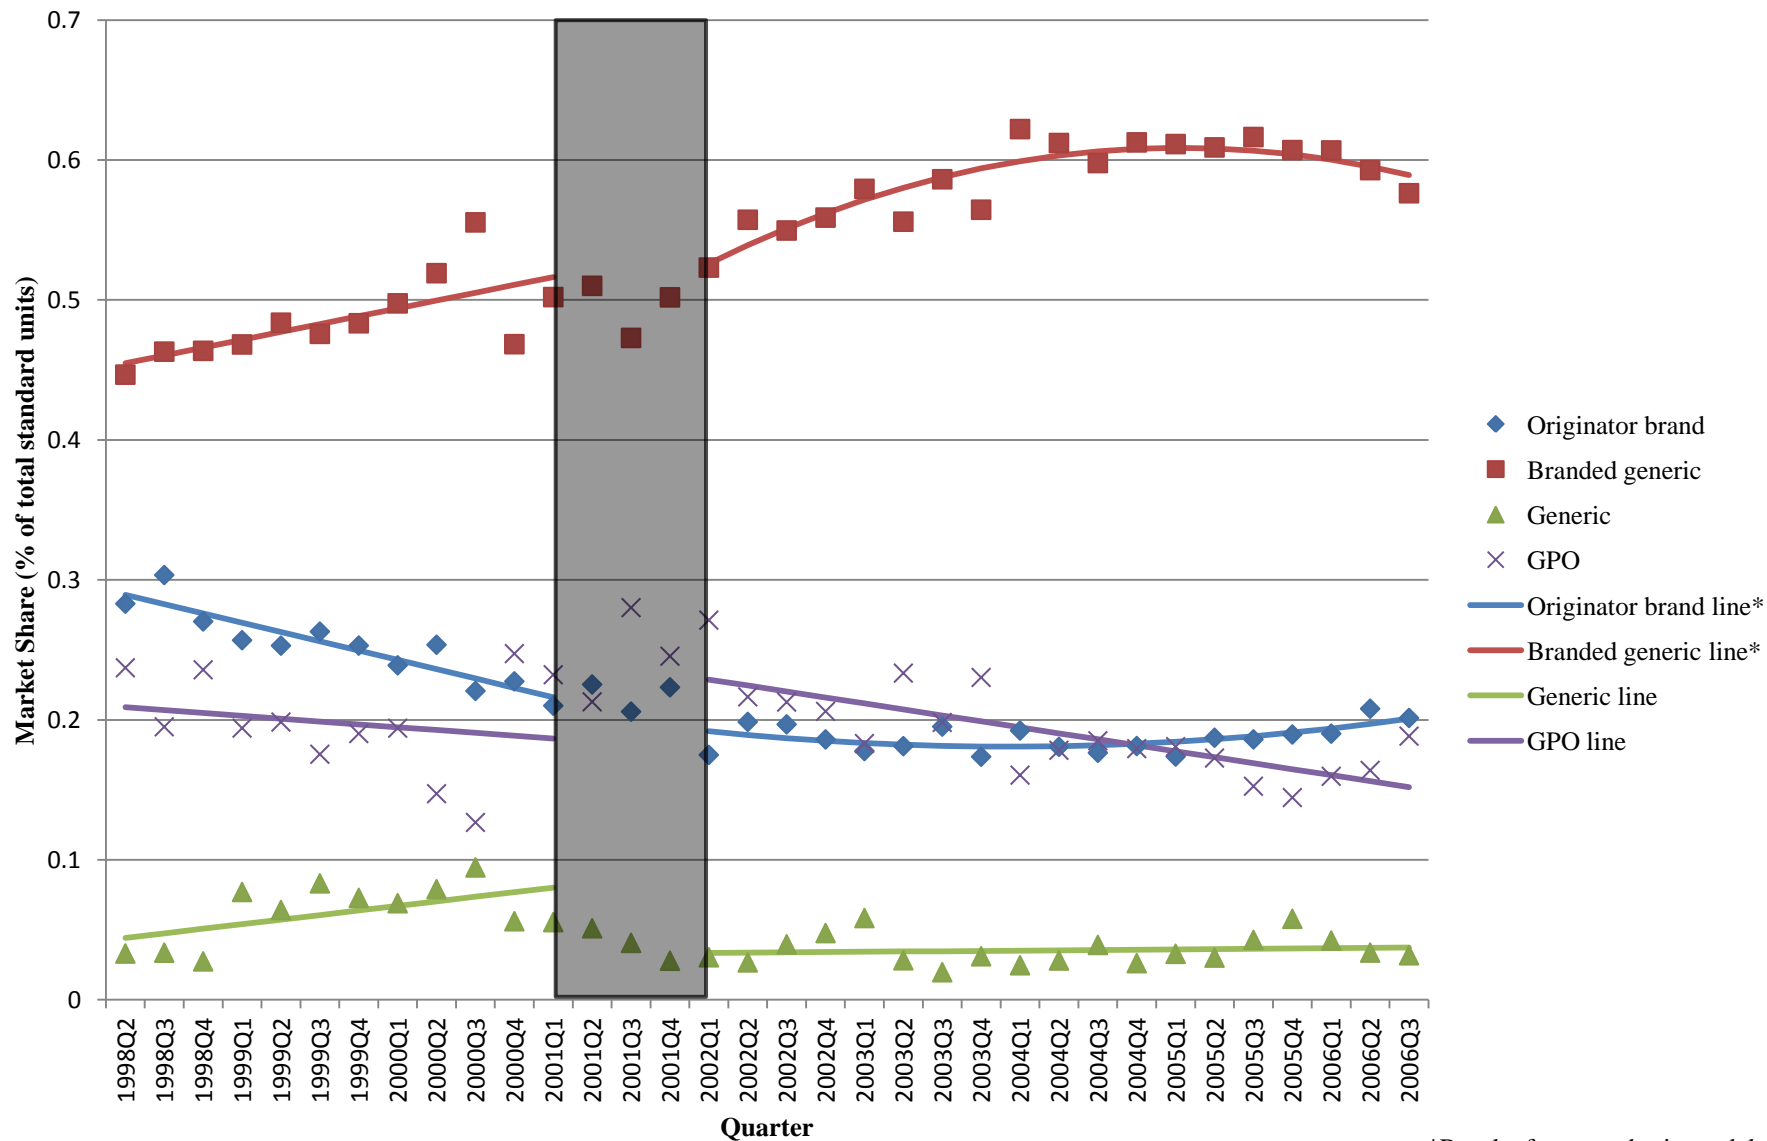

\*Results from quadratic model

Appendix Figure 14. Licensing Status Market Share by Quarter  
Antineoplastics (Hospital Sector)

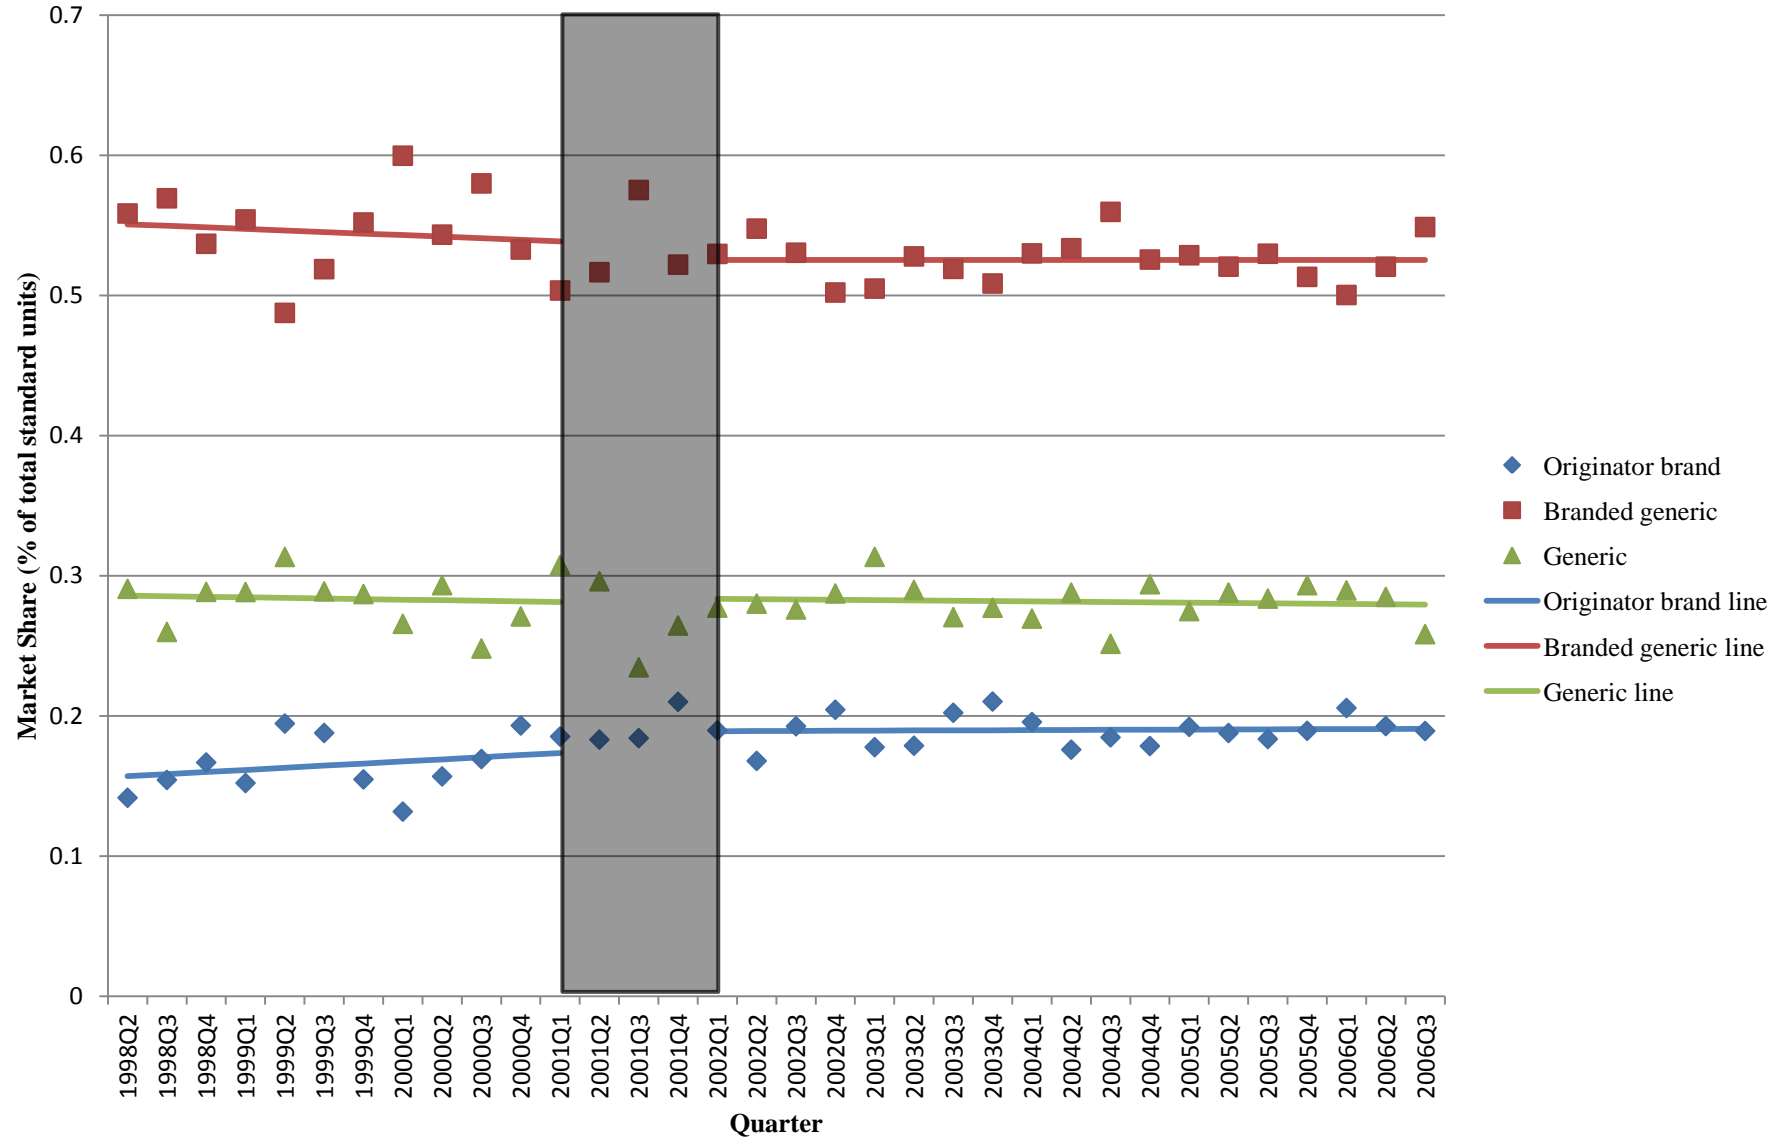



**Appendix Figure 15. Licensing Status Market Share by Quarter**  
**Cytostatic Hormones (Hospital Sector)**

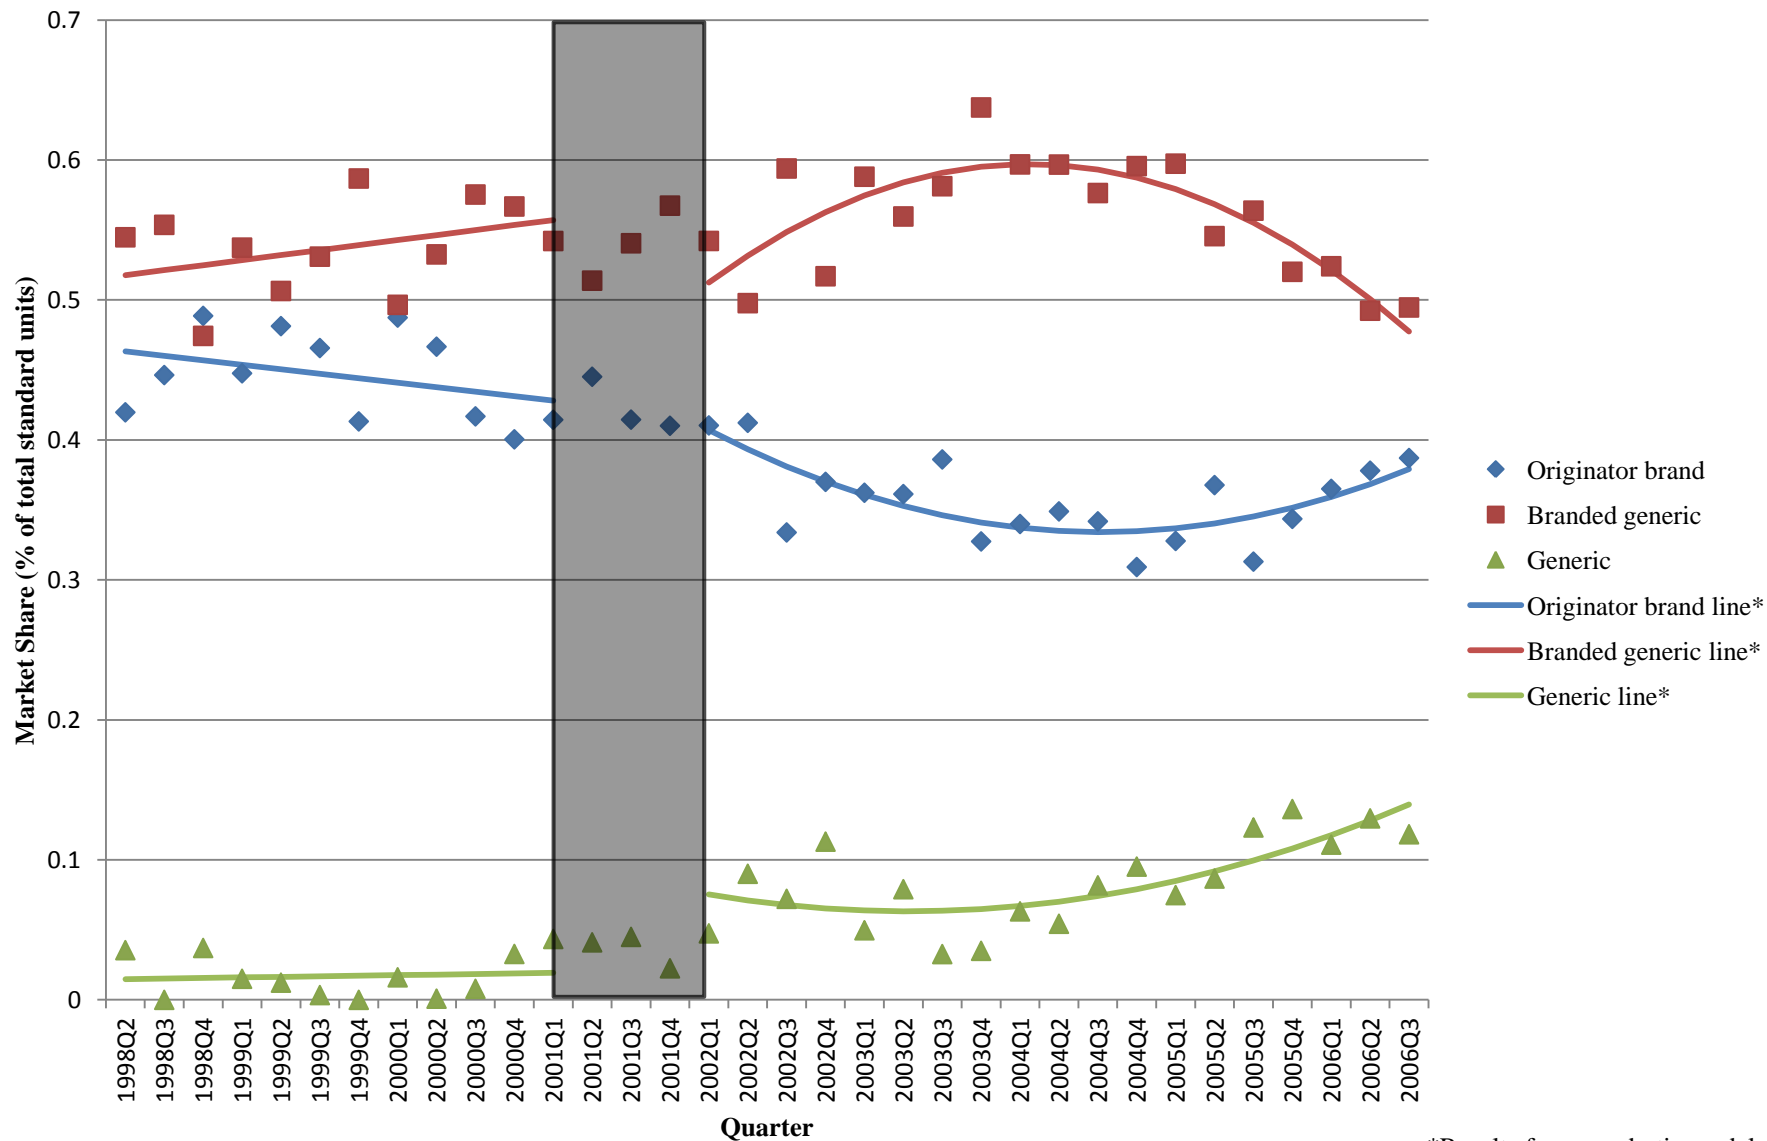

\*Results from quadratic model

**Appendix Figure 16. Licensing Status Market Share by Quarter**  
**Immunostimulating Agents (Hospital Sector)**

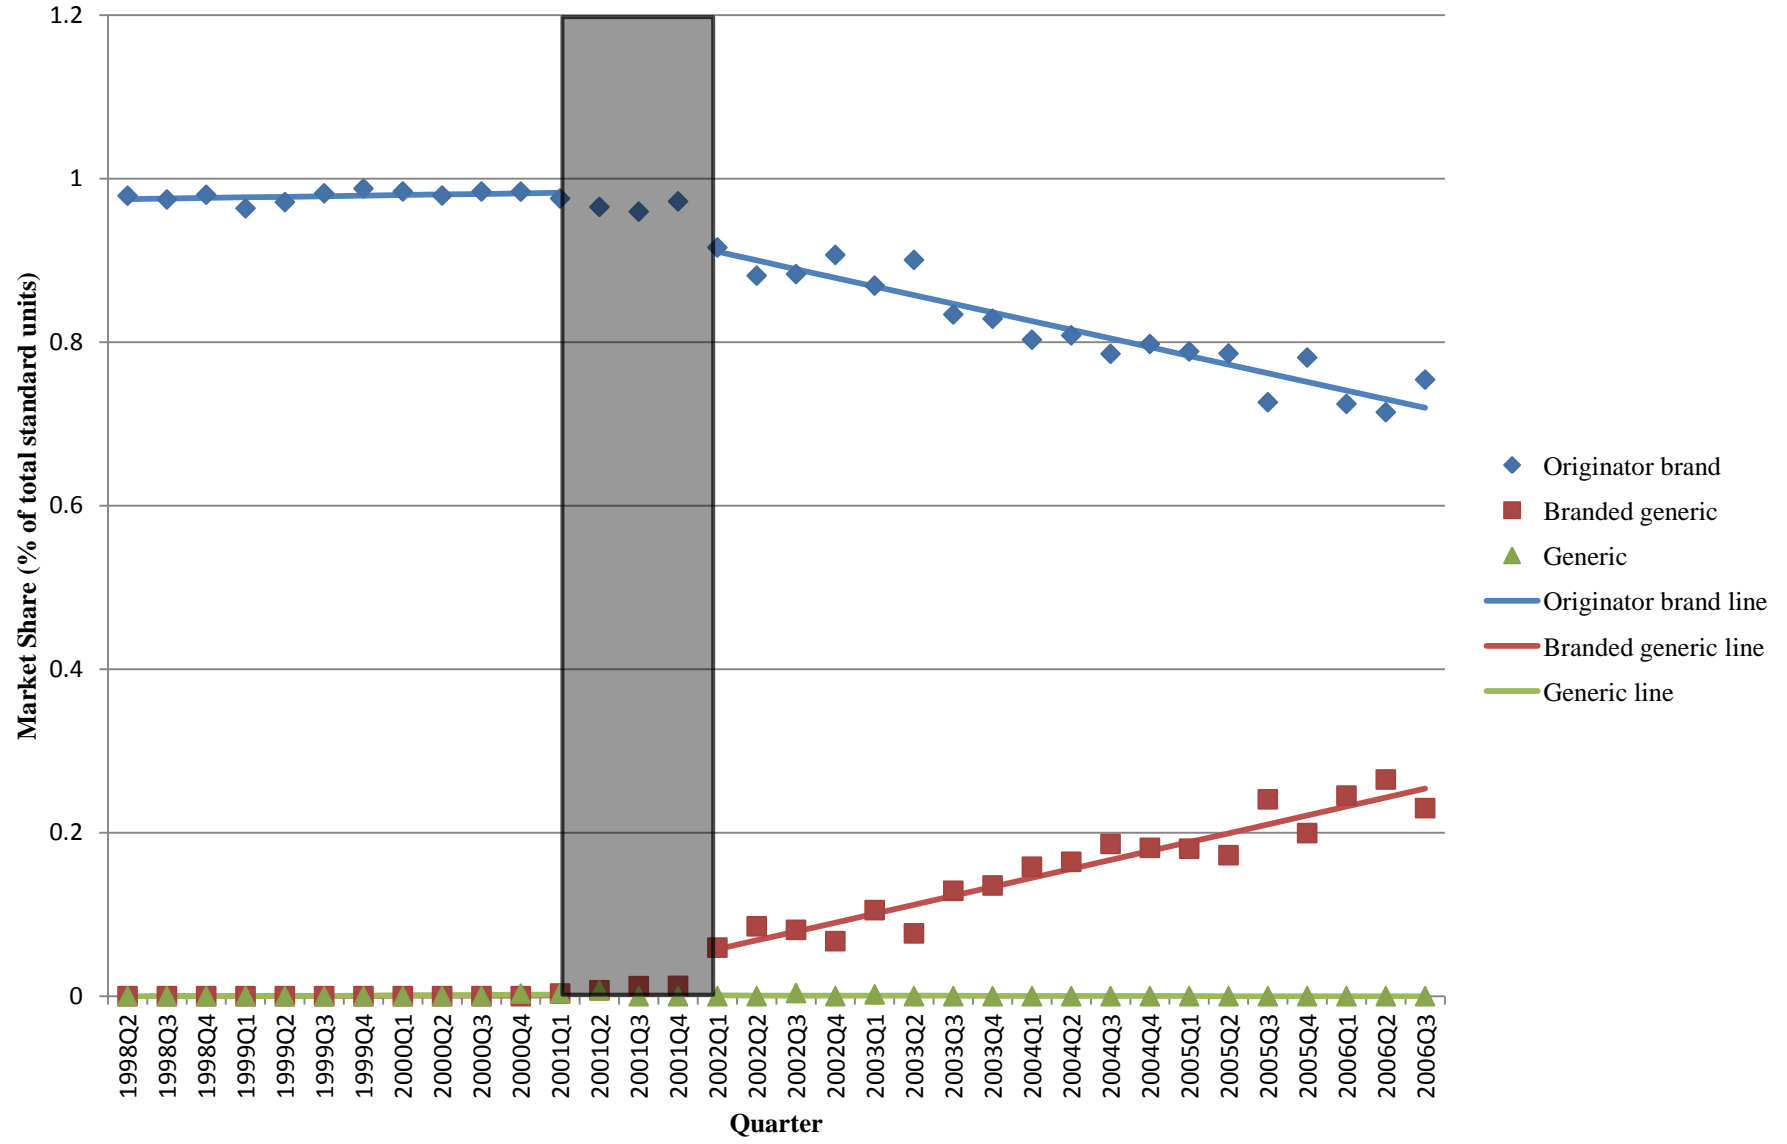

## STROBE Checklist: Impact of Universal Health Coverage in Thailand on Sales and Market Share of Medicines for Non-Communicable Diseases

STROBE Statement—checklist of items that should be included in reports of observational studies

|                              | Item No | Recommendation                                                                                                                                                                                                                                                                                                                                                                                                                                                                                                                                                                                                                                                                                                                                                                                                                                                                                                                                      |
|------------------------------|---------|-----------------------------------------------------------------------------------------------------------------------------------------------------------------------------------------------------------------------------------------------------------------------------------------------------------------------------------------------------------------------------------------------------------------------------------------------------------------------------------------------------------------------------------------------------------------------------------------------------------------------------------------------------------------------------------------------------------------------------------------------------------------------------------------------------------------------------------------------------------------------------------------------------------------------------------------------------|
| <b>Title and abstract</b>    | 1✓      | (a) Indicate the study's design with a commonly used term in the title or the abstract<br>(b) Provide in the abstract an informative and balanced summary of what was done and what was found                                                                                                                                                                                                                                                                                                                                                                                                                                                                                                                                                                                                                                                                                                                                                       |
| <b>Introduction</b>          |         |                                                                                                                                                                                                                                                                                                                                                                                                                                                                                                                                                                                                                                                                                                                                                                                                                                                                                                                                                     |
| Background/rationale         | 2✓      | Explain the scientific background and rationale for the investigation being reported                                                                                                                                                                                                                                                                                                                                                                                                                                                                                                                                                                                                                                                                                                                                                                                                                                                                |
| Objectives                   | 3✓      | State specific objectives, including any prespecified hypotheses                                                                                                                                                                                                                                                                                                                                                                                                                                                                                                                                                                                                                                                                                                                                                                                                                                                                                    |
| <b>Methods</b>               |         |                                                                                                                                                                                                                                                                                                                                                                                                                                                                                                                                                                                                                                                                                                                                                                                                                                                                                                                                                     |
| Study design                 | 4✓      | Present key elements of study design early in the paper<br><b>NOTE: We use an interrupted time series design, which is a robust longitudinal observational design.</b>                                                                                                                                                                                                                                                                                                                                                                                                                                                                                                                                                                                                                                                                                                                                                                              |
| Setting                      | 5✓      | Describe the setting, locations, and relevant dates, including periods of recruitment, exposure, follow-up, and data collection                                                                                                                                                                                                                                                                                                                                                                                                                                                                                                                                                                                                                                                                                                                                                                                                                     |
| Participants                 | 6✓      | (a) <i>Cohort study</i> —Give the eligibility criteria, and the sources and methods of selection of participants. Describe methods of follow-up<br><i>Case-control study</i> —Give the eligibility criteria, and the sources and methods of case ascertainment and control selection. Give the rationale for the choice of cases and controls<br><i>Cross-sectional study</i> —Give the eligibility criteria, and the sources and methods of selection of participants<br>(b) <i>Cohort study</i> —For matched studies, give matching criteria and number of exposed and unexposed<br><i>Case-control study</i> —For matched studies, give matching criteria and the number of controls per case<br><b>NOTE: We explain the data source and methods of selection (i.e., hospital vs. pharmacy sales data – the latter serves as a non-equivalent comparison group) and give the rationale for the choice of therapeutic classes and date range.</b> |
| Variables                    | 7✓      | Clearly define all outcomes, exposures, predictors, potential confounders, and effect modifiers. Give diagnostic criteria, if applicable                                                                                                                                                                                                                                                                                                                                                                                                                                                                                                                                                                                                                                                                                                                                                                                                            |
| Data sources/<br>measurement | 8*✓     | For each variable of interest, give sources of data and details of methods of assessment (measurement). Describe comparability of assessment methods if there is more than one group                                                                                                                                                                                                                                                                                                                                                                                                                                                                                                                                                                                                                                                                                                                                                                |
| Bias                         | 9✓      | Describe any efforts to address potential sources of bias                                                                                                                                                                                                                                                                                                                                                                                                                                                                                                                                                                                                                                                                                                                                                                                                                                                                                           |
| Study size                   | 10✓     | Explain how the study size was arrived at                                                                                                                                                                                                                                                                                                                                                                                                                                                                                                                                                                                                                                                                                                                                                                                                                                                                                                           |
| Quantitative variables       | 11✓     | Explain how quantitative variables were handled in the analyses. If applicable, describe which groupings were chosen and why                                                                                                                                                                                                                                                                                                                                                                                                                                                                                                                                                                                                                                                                                                                                                                                                                        |
| Statistical methods          | 12✓     | (a) Describe all statistical methods, including those used to control for confounding<br>(b) Describe any methods used to examine subgroups and interactions<br>(c) Explain how missing data were addressed<br>(d) <i>Cohort study</i> —If applicable, explain how loss to follow-up was addressed                                                                                                                                                                                                                                                                                                                                                                                                                                                                                                                                                                                                                                                  |

1  
2  
3  
4  
5  
6  
7  
8  
9  
10  
11  
12  
13  
14  
15  
16  
17  
18  
19  
20  
21  
22  
23  
24  
25  
26  
27  
28  
29  
30  
31  
32  
33  
34  
35  
36  
37  
38  
39  
40  
41  
42  
43  
44  
45  
46  
47  
48  
49  
50  
51  
52  
53  
54  
55  
56  
57  
58  
59  
60

*Case-control study*—If applicable, explain how matching of cases and controls was addressed

*Cross-sectional study*—If applicable, describe analytical methods taking account of sampling strategy

---

(e) Describe any sensitivity analyses

Continued on next page

For peer review only

**Results**

|                  |       |                                                                                                                                                                                                                                                                                                                                                                                                                                                       |
|------------------|-------|-------------------------------------------------------------------------------------------------------------------------------------------------------------------------------------------------------------------------------------------------------------------------------------------------------------------------------------------------------------------------------------------------------------------------------------------------------|
| Participants     | 13*NA | (a) Report numbers of individuals at each stage of study—eg numbers potentially eligible, examined for eligibility, confirmed eligible, included in the study, completing follow-up, and analysed<br>(b) Give reasons for non-participation at each stage<br>(c) Consider use of a flow diagram                                                                                                                                                       |
| Descriptive data | 14*✓  | (a) Give characteristics of study participants (eg demographic, clinical, social) and information on exposures and potential confounders<br>(b) Indicate number of participants with missing data for each variable of interest<br>(c) <i>Cohort study</i> —Summarise follow-up time (eg, average and total amount)<br><b>NOTE: We give the characteristics of the therapeutic classes (i.e., number subclasses, medicines within each subclass).</b> |
| Outcome data     | 15*✓  | <i>Cohort study</i> —Report numbers of outcome events or summary measures over time<br><i>Case-control study</i> —Report numbers in each exposure category, or summary measures of exposure<br><i>Cross-sectional study</i> —Report numbers of outcome events or summary measures<br><b>NOTE: We report numbers of outcome events over time.</b>                                                                                                      |
| Main results     | 16✓   | (a) Give unadjusted estimates and, if applicable, confounder-adjusted estimates and their precision (eg, 95% confidence interval). Make clear which confounders were adjusted for and why they were included<br>(b) Report category boundaries when continuous variables were categorized<br>(c) If relevant, consider translating estimates of relative risk into absolute risk for a meaningful time period                                         |
| Other analyses   | 17✓   | Report other analyses done—eg analyses of subgroups and interactions, and sensitivity analyses                                                                                                                                                                                                                                                                                                                                                        |

**Discussion**

|                  |     |                                                                                                                                                                            |
|------------------|-----|----------------------------------------------------------------------------------------------------------------------------------------------------------------------------|
| Key results      | 18✓ | Summarise key results with reference to study objectives                                                                                                                   |
| Limitations      | 19✓ | Discuss limitations of the study, taking into account sources of potential bias or imprecision. Discuss both direction and magnitude of any potential bias                 |
| Interpretation   | 20✓ | Give a cautious overall interpretation of results considering objectives, limitations, multiplicity of analyses, results from similar studies, and other relevant evidence |
| Generalisability | 21✓ | Discuss the generalisability (external validity) of the study results                                                                                                      |

**Other information**

|         |     |                                                                                                                                                               |
|---------|-----|---------------------------------------------------------------------------------------------------------------------------------------------------------------|
| Funding | 22✓ | Give the source of funding and the role of the funders for the present study and, if applicable, for the original study on which the present article is based |
|---------|-----|---------------------------------------------------------------------------------------------------------------------------------------------------------------|

\*Give information separately for cases and controls in case-control studies and, if applicable, for exposed and unexposed groups in cohort and cross-sectional studies.

**Note:** An Explanation and Elaboration article discusses each checklist item and gives methodological background and published examples of transparent reporting. The STROBE checklist is best used in conjunction with this article (freely available on the Web sites of PLoS Medicine at <http://www.plosmedicine.org/>, Annals of Internal Medicine at <http://www.annals.org/>, and Epidemiology at <http://www.epidem.com/>). Information on the STROBE Initiative is available at [www.strobe-statement.org](http://www.strobe-statement.org).



**Impact of Universal Health Insurance Coverage in Thailand  
on Sales and Market Share of Medicines for Non-  
Communicable Diseases: An Interrupted Time Series Study**

|                                 |                                                                                                                                                                                                                                                                                                                                                                                                                                                                                                       |
|---------------------------------|-------------------------------------------------------------------------------------------------------------------------------------------------------------------------------------------------------------------------------------------------------------------------------------------------------------------------------------------------------------------------------------------------------------------------------------------------------------------------------------------------------|
| Journal:                        | <i>BMJ Open</i>                                                                                                                                                                                                                                                                                                                                                                                                                                                                                       |
| Manuscript ID:                  | bmjopen-2012-001686.R1                                                                                                                                                                                                                                                                                                                                                                                                                                                                                |
| Article Type:                   | Research                                                                                                                                                                                                                                                                                                                                                                                                                                                                                              |
| Date Submitted by the Author:   | 04-Oct-2012                                                                                                                                                                                                                                                                                                                                                                                                                                                                                           |
| Complete List of Authors:       | Garabedian, Laura; Harvard Medical School and Harvard Pilgrim Health Care Institute, Department of Population Medicine<br>Ross-Degnan, Dennis; Harvard Medical School and Harvard Pilgrim Health Care Institute, Department of Population Medicine<br>Ratanawijitrasin, Sauwakon; Mahidol University, Faculty of Social Sciences and Humanities<br>Stephens, Peter; IMS Health,<br>Wagner, Anita; Harvard Medical School and Harvard Pilgrim Health Care Institute, Department of Population Medicine |
| <b>Primary Subject Heading</b>: | Global health                                                                                                                                                                                                                                                                                                                                                                                                                                                                                         |
| Secondary Subject Heading:      | Health policy, Health economics, Health services research, Pharmacology and therapeutics, Public health                                                                                                                                                                                                                                                                                                                                                                                               |
| Keywords:                       | Health policy < HEALTH SERVICES ADMINISTRATION & MANAGEMENT, Health economics < HEALTH SERVICES ADMINISTRATION & MANAGEMENT, Essential Medicines, CARDIOLOGY, DIABETES & ENDOCRINOLOGY, ONCOLOGY                                                                                                                                                                                                                                                                                                      |
|                                 |                                                                                                                                                                                                                                                                                                                                                                                                                                                                                                       |

SCHOLARONE™  
Manuscripts

## TITLE PAGE

**Impact of Universal Health Insurance Coverage in Thailand on Sales and Market Share of Medicines for Non-Communicable Diseases: an Interrupted Time Series Study**

Laura Faden Garabedian, MPH<sup>1</sup>, Dennis Ross-Degnan, ScD<sup>1</sup>, Sauwakon Ratanawijitrasin, PhD<sup>2</sup>, Peter Stephens, MA<sup>3</sup>, Anita Wagner, PharmD, MPH, DrPH<sup>1</sup>

*Institutions:*

<sup>1</sup> Drug Policy Research Group and WHO Collaborating Center in Pharmaceutical Policy  
Department of Population Medicine, Harvard Medical School and Harvard Pilgrim Health Care  
Institute  
133 Brookline Ave., Sixth Floor  
Boston, MA, USA

Dennis Ross-Degnan and Anita Wagner are Associate Professors. Laura Faden Garabedian is a Research Fellow and PhD Candidate.

Corresponding author: Laura Faden Garabedian

Phone: +1 617 509 9921

Email: lfaden@fas.harvard.edu

<sup>2</sup> Professor

Faculty of Social Sciences and Humanities, Mahidol University  
Salaya, Buddhamonthon, Nakhonpathom, 73170 Thailand

<sup>3</sup> Director, Public Health Affairs

IMS Health

7 Harewood Avenue

London, NW1 6JB, UK

**Study Design:** Observational study (interrupted time series design)

**Acknowledgements:** We gratefully acknowledge support of statistical analyses by Dr. Fang Zhang, Department of Population Medicine, Harvard Medical School and Harvard Pilgrim Health Care Institute, Boston, USA. Dr. Sanita Hirunrassamee, Phramongkutklao Hospital, Bangkok, Thailand, and Ms. Rosarin Sruamsiri and Dr. Nathorn Chaiyakunapruk, Naresuan University, Phitsanulok, Thailand, provided helpful input on Thai essential medicines listings and coverage policies. Mr. Amit Backliwal, at the time of the study at IMS Health, Bangkok, Thailand, shared valuable insights on the Thai pharmaceutical market.

**Author contributions:** Laura Garabedian, Dennis Ross-Degnan and Anita Wagner designed the study and developed the analytic approach. Peter Stephens assembled the data files. Laura Garabedian analyzed the data. Sauwakon Ratanawijitrasin provided the Thai national list of essential medicines and information on relevant Thai policies and context surrounding the

1 reform. All authors participated in the interpretation of the results. Laura Garabedian wrote the  
2 first draft of the paper. All authors contributed to the writing of the manuscript.

3  
4 Opinions expressed are solely those of the authors and not of the institutions they represent.

5  
6 **Competing Interest Statement:** All authors have completed the Unified Competing Interest  
7 form at [www.icmje.org/coi\\_disclosure.pdf](http://www.icmje.org/coi_disclosure.pdf) (available on request from the corresponding author)  
8 and declare: LFG had financial support from Harvard Medical School and Harvard University,  
9 AW and DRD were supported in part by a grant from the Novartis Foundation for Sustainable  
10 Development, PS is an employee of IMS Health; no financial relationships with any  
11 organisations that might have an interest in the submitted work in the previous 3 years; no other  
12 relationships or activities that could appear to have influenced the submitted work.

13 **Funding:** IMS Health provided the data in-kind. The Harvard Medical School Fellowship in  
14 Pharmaceutical Policy Research and the Harvard University PhD Program in Health Policy  
15 supported Ms. Garabedian. Drs. Wagner and Ross-Degnan were supported in part by a grant  
16 from the Novartis Foundation for Sustainable Development to develop examples of research on  
17 access to medicines using IMS Health data for presentation at the Third International Conference  
18 for Improving Use of Medicines.

19  
20 **IRB Approval:** Harvard Pilgrim Health Care Institute Office of Sponsored Programs

21  
22 **Exclusive Licence Statement:** The Corresponding Author has the right to grant on behalf of all  
23 authors and does grant on behalf of all authors, [a worldwide licence](#) to the Publishers and its  
24 licensees in perpetuity, in all forms, formats and media (whether known now or created in the  
25 future), to i) publish, reproduce, distribute, display and store the Contribution, ii) translate the  
26 Contribution into other languages, create adaptations, reprints, include within collections and  
27 create summaries, extracts and/or, abstracts of the Contribution, iii) create any other derivative  
28 work(s) based on the Contribution, iv) to exploit all subsidiary rights in the Contribution, v) the  
29 inclusion of electronic links from the Contribution to third party material where-ever it may be  
30 located; and, vi) licence any third party to do any or all of the above.

31  
32 **Data Sharing Statement:** Data available upon request, at the approval of IMS Institute for  
33 Healthcare Informatics.



1  
2  
3 1 **Article Summary**  
4

5 2 **Article Focus**  
6

- 7 3 • Medicines present a key challenge to achieving universal coverage.  
8 4 • Health insurance systems have the potential to improve cost-effective use of medicines,  
9 5 yet there is little evidence about their impact on medicine use in low- and middle-income  
10 6 countries.  
11 7 • The rapid implementation of universal health coverage in Thailand presents a unique  
12 8 opportunity to measure the impact of health insurance expansion and capitated payment  
13 9 on utilization of medicines.  
14  
15

16  
17 10 **Key Messages**  
18

- 19 11 • Expanding health insurance coverage with a medicines benefit to the entire Thai  
20 12 population increased access to medicines in primary care.  
21 13 • The universal coverage scheme did not seem to have increased use of medicines for  
22 14 diseases that are typically treated in secondary or tertiary care settings, or increased  
23 15 generic market penetration.  
24 16 • In the future, it will be important for countries to assess quality and equity of medicines  
25 17 use as they pursue policies to achieve universal coverage.  
26  
27

28 18 **Strengths and Limitations**  
29

- 30 19 • We used an interrupted time series design, the strongest quasi-experimental approach for  
31 20 evaluating effects of interventions, increasing internal validity.  
32 21 • It is impossible to examine population subgroups in national IMS Health market data, but  
33 22 we are reasonably confident that universal coverage scheme enrollees are responsible for  
34 23 observed changes.  
35  
36  
37  
38  
39  
40  
41  
42  
43  
44  
45  
46  
47  
48  
49  
50  
51  
52  
53  
54  
55  
56  
57  
58  
59  
60

1  
2  
3 **1 ABSTRACT**  
4

5 **2 Objective:** In 2001, Thailand implemented the Universal Coverage Scheme (UCS), a public  
6 insurance system that aimed to achieve universal access to health care, including essential  
7 medicines, and to influence primary care centers and hospitals to use resources efficiently, via  
8 capitated payment for outpatient services and other payment policies for inpatient care. Our  
9 objective was to evaluate the impact of the UCS on utilization of medicines in Thailand for three  
10 non-communicable diseases: cancer, cardiovascular disease, and diabetes.  
11  
12

13 **3 Design:** Interrupted time series design, with a non-equivalent comparison group.  
14

15 **4 Setting:** Thailand, 1998-2006.  
16

17 **5 Data:** Quarterly purchases of medicines from hospital and retail pharmacies collected by IMS  
18 Health between 1998 and 2006.  
19

20 **6 Intervention:** UCS implementation, April-October 2001.  
21

22 **7 Outcome measures:** Total pharmaceutical sales volume and percent market share by licensing  
23 status and National Essential Medicine List (NEML) status.  
24

25 **8 Results:** The UCS was associated with long-term increases in sales of medicines for conditions  
26 that are typically treated in outpatient primary care settings, such as diabetes, high cholesterol  
27 and high blood pressure, but not for medicines for diseases that are typically treated in secondary  
28 or tertiary care settings, such as heart failure, arrhythmias, and cancer. While the majority of  
29 increases in sales were for essential medicines, there were also post-policy increases in sales of  
30 non-essential medicines. Immediately following the reform, there was a significant shift in  
31 hospital sector market share by licensing status for most classes of medicines. Government-  
32 produced products often replaced branded generic or generic competitors.  
33

34 **9 Conclusions:** Our results suggest that expanding health insurance coverage with a medicines  
35 benefit to the entire Thai population increased access to medicines in primary care. However, our  
36 study also suggests that the UCS may have had potentially undesirable effects. Evaluations of the  
37 long-term impacts of universal health coverage on medicines utilization are urgently needed.  
38  
39  
40  
41  
42  
43  
44  
45  
46  
47  
48  
49  
50  
51  
52  
53  
54  
55  
56  
57  
58  
59  
60

1  
2  
3 1 **MANUSCRIPT**  
4

5  
6 2 **Introduction**  
7

8 3 *Universal Health Coverage*  
9

10 4 In 2005, Member States of the World Health Organization (WHO) made a commitment to work  
11 5 towards universal health care coverage.<sup>1</sup> The 2010 WHO World Health Report provides a  
12 6 roadmap for countries to achieve this goal.<sup>2</sup> Universal coverage requires the restructuring of  
13 7 health care and financing systems to improve access to health care services, reduce financial  
14 8 hardship, and increase the efficiency and equity of the health system.<sup>2</sup>  
15 9

16 10 Medicines, which consume 25%–65% of total public and private spending on health in  
17 11 developing countries,<sup>3</sup> present a key challenge to achieving universal coverage. The high  
18 12 spending on, and inefficient use of, medicines threaten the financial sustainability of a universal  
19 13 coverage scheme. According to the WHO, three of the top ten sources of health care inefficiency  
20 14 involve medicines: high medicine prices and underuse of generics; use of substandard and  
21 15 counterfeit medicines; and inappropriate and ineffective use of medicines.<sup>2</sup> Health insurance  
22 16 systems have several features (e.g., a defined population, access to utilization data, and financial  
23 17 leverage) that give them a unique advantage to reduce out-of-pocket (OOP) expenditures and  
24 18 improve the cost-effective use of medicines through active management strategies involving  
25 19 medicines selection, purchasing, contracting (e.g., physician payment) and utilization  
26 20 management.<sup>4</sup> However, there is little evidence about the impact of health insurance on access to  
27 21 and use of medicines in low- and middle-income countries (LMICs).<sup>4</sup>  
28 22

29 23 The recent implementation of universal health coverage in Thailand presents a unique  
30 24 opportunity to measure the impact of health insurance expansion and hospital payment changes  
31 25 (the majority of the population is now covered under a closed-ended payment scheme<sup>5</sup>) on  
32 26 utilization of medicines.  
33 27

34 28 *Universal Health Coverage in Thailand*  
35 29

36 30 With the implementation of the UCS in 2001, Thailand became one of the first LMICs to achieve  
37 31 universal coverage.<sup>6,7</sup> The reform preserved the formal sector workforce schemes: the Social  
38 32 Health Insurance (SHI) scheme for private sector employees (7.2% of the total population in  
39 33  
40 34  
41 35  
42 36  
43 37  
44 38  
45 39  
46 40  
47 41  
48 42  
49 43  
50 44  
51 45  
52 46  
53 47  
54 48  
55 49  
56 50  
57 51  
58 52  
59 53  
60 54

1  
2  
3 1 2001) and the Civil Service Medical Benefit Scheme (CSMBS) for government employees and  
4 their dependents (8.5%).<sup>8</sup> The UCS covered those previously enrolled in a voluntary health card  
5 (VHC) scheme (20.8%), in private health insurance (2.1%), or in a tax-based, means-tested Low  
6 Income Scheme (LIS) for the poor, elderly, children and disabled (32.4%)<sup>8,9</sup> as well as more than  
7 one quarter (29.0%) of the population without previous insurance.<sup>8</sup> The UCS was rolled out to all  
8 provinces between April and October 2001.<sup>6</sup> By 2004, 95.5% of the population was insured, with  
9 three-quarters (75.2%) of the population covered by the UCS.<sup>6</sup>

10  
11  
12 9 In addition to coverage expansion, the reform also dramatically altered the mechanism for  
13 hospital payment. Before the reform, hospitals were accustomed to fee-for-service (FFS)  
14 payments from most insurance schemes, aside from SSI, and the uninsured, who paid OOP per  
15 service (i.e., user fees).<sup>10</sup> The majority of user fee spending was on medicines.<sup>11</sup> After the  
16 reform, FFS payment only applied to CSMBS patients and for the majority of patients, now UCS  
17 enrollees, hospitals were paid on a closed-ended basis<sup>5</sup> for all covered services, including  
18 medicines.

19  
20  
21 17 The UCS is a compulsory, tax-financed scheme with comprehensive coverage of inpatient and  
22 outpatient services, including medicines on the National List of Essential Medicines (NLEM).<sup>6</sup>  
23 Individuals must enroll in the scheme at a local Contracting Unit for Primary Care (CUP),<sup>6</sup>  
24 primarily housed in government-owned hospitals.<sup>12</sup> Each CUP receives a capitated payment per  
25 registered member to provide outpatient services and medicines.<sup>6</sup> CUPs initially served as gate-  
26 keepers for secondary and tertiary hospitals. At the beginning of the scheme, when patients were  
27 referred, diagnosis-related payments (DRG) for higher-level care had to come out of the CUP's  
28 capitated payment, so CUPs had a financial disincentive to refer patients.<sup>6</sup> Shortly after the  
29 reform was implemented, a separate fund (i.e., a global budget) for inpatient services was  
30 created, which likely reduced disincentives to refer created by the capitated payment scheme.<sup>6</sup> A  
31 capitated payment also creates financial incentives for use of lower cost medicines (e.g., generics  
or less expensive therapeutic alternatives).

32  
33  
34  
35  
36  
37  
38  
39  
40  
41  
42  
43  
44  
45  
46  
47  
48  
49  
50  
51  
52  
53  
54  
55 30 Our objective was to evaluate the immediate, short-term (one year) and long-term (five year)  
56 impacts of the UCS on pharmaceutical market size and composition for medicines for three non-  
57  
58  
59  
60

1 communicable diseases (NCDs): cancer, cardiovascular disease, and diabetes. We hypothesized  
2 that the UCS would result in a gradual increase in sales volume, particularly of products used in  
3 primary care, as enrollment into the scheme increased and likely made access to health services  
4 and medicines more affordable for the majority of the population. We also hypothesized that  
5 there would be an immediate shift in market share from more expensive brand name to less  
6 expensive generic or branded generic products and to medicines on the NLEM in response to  
7 closed-ended budget rules. We focused on medicines for NCDs since these illnesses represent a  
8 large and growing health care burden in Thailand<sup>13-16</sup> and other LMICs<sup>17</sup> and most, but not all,  
9 medicines for NCDs would be prescribed and dispensed in primary care settings.

## 10 **Methods**

### 11 ***Data***

12 We used data on quarterly pharmaceutical sales in Thailand from 1998 to 2006 provided by IMS  
13 Health.<sup>18</sup> The sales data are generated from reports to IMS Health by multinational  
14 pharmaceutical companies and surveys of purchases by hospital and retail pharmacies. IMS  
15 surveys approximately 200 hospitals (including general and specialized, public and private) and  
16 350 retail pharmacies in Thailand. These facilities constitute a stratified random sample of the  
17 over 1,100 hospitals and 14,000 retail pharmacies in Thailand to enable national projections.  
18 Documentation on the IMS data collection and validation process is available upon request from  
19 the authors. Medicines were classified according to the European Pharmaceutical Research  
20 Association (EphMRA) Anatomical Therapeutic Chemical (ATC) system.<sup>19</sup>

### 22 ***Outcomes***

23 We used two outcome measures: total volume and percent market share. *Total volume* is the  
24 number of standard units purchased per capita per quarter (i.e., “sales”). We analyzed total  
25 volume by sector (i.e., retail versus hospital). A standard unit, as defined by IMS Health, is the  
26 smallest dose of a product, which equates to one tablet or capsule for an oral dosage form, one  
27 teaspoon (5ml) for a syrup, and one ampoule or vial for an injectable product. For the total  
28 volume analyses, we divided total volume by size of the population over 15 years old to control  
29 for population growth (using yearly population estimates from the World Bank<sup>20</sup>). We used the  
30 entire population as denominator for insulins, since they are also used for Type 1 diabetes, a  
31 chronic disease that affects children. *Percent market share* is the percent of total volume in four

1 mutually exclusive categories of licensing status: originator brand products, branded generic  
2 products (products sold under a brand name other than the originator brand name of the  
3 molecule), generic products (products that are sold under the generic molecule name), and  
4 products manufactured by Thailand's Government Pharmaceutical Organization (GPO). We also  
5 assessed percent market share by NLEM status (based on the 1999 and 2004 Thai NLEM).  
6

7 We analyzed total volume and market share for medicines in eight therapeutic classes: two  
8 classes of diabetes products (oral antidiabetics and insulins), three classes of cardiovascular  
9 disease products (antihypertensives, lipid-regulating, and cardiac therapy products) and three  
10 classes of cancer products (antineoplastics, immunostimulating agents, and cytostatic hormone  
11 therapy products); Table 1 in the online appendix lists all medicines by ATC code. We assigned  
12 each therapeutic class to one of two categories: medicines usually used to treat primary care  
13 health conditions and medicines usually used to treat more complicated conditions, typically in  
14 secondary/tertiary, often inpatient care, settings. Antidiabetic, insulin, antihypertensive and lipid-  
15 lowering products are usually used for primary care conditions (i.e., diabetes, high blood  
16 pressure and high cholesterol), whereas cardiac therapy and cancer products are usually used for  
17 more severe conditions that more likely require treatment by a specialist and/or in an inpatient  
18 setting.  
19

### 20 ***Research Design***

21 We used an interrupted time series design, the strongest quasi-experimental approach for  
22 evaluating effects of interventions, which has been used extensively for medication use  
23 research.<sup>21</sup> Although we did not have an equivalent control group, we used medicines sold in the  
24 retail sector as a non-equivalent comparison group,<sup>22</sup> assuming that the retail market should be  
25 relatively unaffected by the reforms since UCS enrollees could only obtain covered medicines  
26 through their local, hospital-based CUP.  
27

### 28 ***Statistical Analysis***

29 The intervention was the UCS roll-out from April to October 2001. We defined three distinct  
30 periods: 12 quarters pre-reform (1998Q2-2001Q1), a 3-quarter UCS roll-out period (2001Q2-  
31 2001Q4; grey box in figures), and 19 quarters post-reform (2002Q1-2006Q3). We ended analysis  
58  
59  
60

1 prior to 2006Q4 since there was a policy change at that time (the removal of an initial 30 Baht  
2 co-payment per visit) which may have impacted outcomes. In sensitivity analyses, we extended  
3 the intervention roll-out period through 2002 and through 2003 to account for potentially delayed  
4 implementation and lag of actual enrollment into the scheme.

5  
6 We used segmented linear regression to measure the pre-reform trend, the immediate level  
7 change following the intervention period, and the post-reform change in trend (as compared to  
8 the pre-reform trend). For the NLEM analysis, we reclassified NLEM status in 2005Q1 (when  
9 the 2004 list was implemented) and included a pre-post term (“NLEM”) in the model to account  
10 for possible discontinuity due to the reclassification. We report two estimates from the  
11 segmented regression models – the post-reform change in trend and the immediate level change  
12 following the reform. We controlled for serial autocorrelation using an autoregressive error  
13 model. We retained all terms in the models, even if non-significant. We used the models to  
14 estimate absolute and relative differences (with 95% confidence intervals)<sup>23</sup> in observed versus  
15 predicted total volume at one year and five years post-reform. In sensitivity analyses, we  
16 included a quadratic term for the post-reform trend and used a likelihood ratio test to determine  
17 the best-fitting model. We report below results from the best-fitting model of the shortest (i.e., 3  
18 quarter) intervention period and mention differences in model results where they existed. Results  
19 from sensitivity analyses are available upon request. We used the AUTOREG procedure in SAS  
20 9.3 for all analyses.

## 21 22 **Results**

### 23 24 ***Hospital Sector Volume***

25 The majority of sales in Thailand for all cancer, cardiovascular disease and diabetes medicines  
26 studied were in the hospital sector and were for medicines on the NLEM. After implementation  
27 of the UCS, there was a significant increase in *level* of sales of insulins and a significant increase  
28 in *trend* in sales of antidiabetic, insulin, antihypertensive, lipid regulating, and cytostatic  
29 hormone products [Table 1, Figures 1 and 2]. There was a significant reduction in *level* of sales  
30 immediately following the reforms for three medication classes: antihypertensive, cardiac

1  
2  
3 1 therapy and immunostimulating agents (although only the latter was significant in the sensitivity  
4 analyses using a longer intervention period) [Table 1, Figures 1 and 2].  
5  
6  
7 3

8  
9 4 The UCS was associated with increased sales of diabetes medicines. One year after the policy,  
10 the sale of insulin was 35% (95% CI: 15%, 55%) higher and, at five years, 174% (95% CI:  
11 114%-235%) higher than what would have been expected in the absence of the UCS [Table 2].  
12  
13 6 The increase in insulin sales was driven primarily by human insulins, which are on the NLEM  
14 and marketed as branded generics by two manufacturers. The policy was associated with a 39%  
15 (95% CI: 14%, 64%) increase in antidiabetic product sales five years after implementation  
16 [Table 2]. This was largely due to increased sales of generic and branded generic metformin and  
17 glibenclamide products, both of which are on the NLEM.  
18  
19 10  
20  
21 11  
22  
23 12

24  
25 13 Implementation of the UCS appears to have had a mixed impact on sales of cardiovascular  
26 medicines. Five years after the policy, the sale of lipid lowering agents was nearly double (108%  
27 increase; 95% CI: 60%, 157%) what would have been expected in the absence of the scheme  
28 [Table 2]. The increase was primarily due to sales of branded generic simvastatin and  
29 gemfibrozil products, which are on the NLEM, and a small but steady increase in sales of  
30 originator atorvastatin products, which were not on the NLEM until 2004. For antihypertensives,  
31 the significant increase in post-policy trend compensated for an initial drop in sales, resulting in a  
32 slight increase in sales five years after the policy (19% increase; 95% CI: -3%, 40%). The  
33 increased trend was primarily due to sales of enalapril, atenolol, and amlodipine, all of which are  
34 on the NLEM and predominately sold as branded generics. The reform had no significant impact  
35 on sales of cardiac therapy medicines one or five years after the policy.  
36  
37 20  
38  
39 21  
40  
41 22  
42  
43 23  
44  
45 24

46 25 The results were also mixed for cancer medicines. The UCS had no significant one- or five-year  
47 impact on the sale of antineoplastics or cytostatic hormones (although the latter class did  
48 experience a significant post-policy increase in trend). However, the policy was associated with  
49 an immediate reduction in sales of immunostimulating agents that did not recover in the post-  
50 policy period. One year after implementation, the sale of immunostimulating agents was 35%  
51 (95% CI: -45%, -25%) lower than expected from pre-policy trends, and 26% lower (95% CI: -  
52 45%, -8%) five years post-policy. This drop is almost entirely due to a sharp reduction in sales of  
53  
54  
55 30  
56  
57 31  
58  
59  
60



1  
2  
3 1 interferon alfa-2b, a non-NLEM medicine, around the time of UCS implementation, which could  
4 have been due to a coincidental recall of an interferon alfa-2b product.<sup>24</sup>  
5  
6  
7  
8

9 4 Finally, as expected, the reform had little impact on sales volume in the retail sector – there were  
10 few significant post-implementation changes, and the changes that were significant were small in  
11 magnitude [see online appendix, Table 2].  
12  
13  
14

### 15 7 16 8 *Hospital Sector Market Share*

17 9 Immediately following the reform, there were significant shifts in hospital sector market share by  
18 licensing status for most classes [Table 3]. The changes for antidiabetics and cardiac medicines -  
19 the two therapeutic classes with the largest shifts – were due to significant increases in GPO-  
20 produced medicines, primarily at the expense of branded generics and, to a lesser extent,  
21 generics. There was a significant increase in GPO antidiabetic products (+16% of market; 95%  
22 CI: 12%, 20%), and decreases in branded generic (-12%; 95% CI: -16%, -9%) and generic (-4%;  
23 95% CI: -6%, -1%) products immediately after the policy [Figure 3]. Similarly, there was a  
24 significant increase in GPO cardiac therapy products (+22%; 95% CI: 15%, 28%), and  
25 significant decreases of branded generic (-14%; 95% CI: -21%, -7%) and generic (-4%; 95% CI: -  
26 6%, -2%) products immediately after the policy [Figure 4]. There was also a small decrease in  
27 market share of generic antihypertensives (-6%; 95% CI: -8%, -3%), which was compensated for  
28 by a marginally significant increase in GPO products.  
29  
30  
31

32 21  
33 22 The market for lipid regulating agents experienced an immediate shift from originator products (-  
34 8% market share; 95% CI: -10%, -5%) to branded generics (+8%; 95% CI: 5%, 10%). A similar  
35 shift was seen for in the market for immunostimulating agents (6% decrease in originator  
36 products [95% CI: -10%, -3%] and a 5% increase in branded generics [95% CI: 2%, 7%]). The  
37 cytostatic hormone market experienced an immediate shift from branded generic (-8%; 95% CI: -  
38 12%, -4%) to generic products (+6%, 95% CI: 1%, 11%). Generic insulins experienced a slight  
39 decrease in market share caused by the market exit of the sole generic manufacturer just prior to  
40 the policy. There were no immediate changes in market share for antineoplastics. Aside from the  
41 immediate level changes following the policy, there were few major changes in market share for  
42 all classes.  
43  
44  
45  
46  
47  
48  
49  
50  
51  
52  
53  
54  
55  
56  
57  
58  
59  
60

1 The UCS did not have a major impact on NLEM market share, likely because the share of  
2 NLEM medicines was already quite high [see online appendix Table 6 and Figure 17]. The only  
3 notable level change, for immunostimulating agents, was likely due to the coincidental recall of a  
4 non-NLEM interferon alfa-2b product.<sup>24</sup> While all medicine classes had significant post-reform  
5 trends, these trends were small in magnitude and NLEM market share remained fairly stable over  
6 the study period until the 2004 NLEM was introduced. There were large changes in NLEM  
7 market share for three classes – antihypertensives, lipid regulating agents and cytostatic  
8 hormones – at the time of the 2004 NLEM implementation in 2005Q1 [see online appendix  
9 Table 6 and Figure 17]. Given the increase in post-reform volume for many medicine classes, a  
10 stable NLEM market share in the short-term (i.e., pre-2005) following the UCS implementation  
11 suggests a post-reform increase in both NLEM and non-NLEM medicines.

### 13 Discussion

14 The UCS was associated with long-term (i.e., 5 year) increases in hospital sector sales of  
15 medicines for chronic diseases that are usually treated in primary care settings, such as diabetes,  
16 high blood pressure, and high cholesterol. We hypothesized this gradual increase in volumes  
17 since the UCS expanded access to primary care<sup>25</sup> and actual enrollment into the scheme occurred  
18 gradually from implementation in 2001 until around 2004, by which time 95.5% of the  
19 population had insurance coverage.<sup>6</sup> The UCS, which radically changed hospital financing and  
20 reimbursement, was also associated with an immediate market shift to locally produced or  
21 branded generic products for most therapeutic classes.

22  
23 Despite these increases in access, the policy did not appear to increase sales of medicines for  
24 more severe diseases like heart failure, arrhythmias, and cancer, which are often treated in  
25 secondary or tertiary settings. This finding is consistent with evidence that the capitated payment  
26 system initially discouraged referrals of UCS patients to higher-level care.<sup>6,25,26</sup> The UCS also  
27 appears to have had a mixed impact on utilization of essential medicines. There were increases in  
28 NLEM medicines, which are covered, as well as non-NLEM medicines. Similarly, given the  
29 capitated UCS payment system, we expected to see an increase in sales of generic medicines,  
30 which are typically less expensive. However, the majority of sales in most classes were for  
31 branded generic products, many of which had generic alternatives in the market. Interestingly,

1  
2  
3 1 substantial market share shifts occurred toward products manufactured by the Thai GPO, which  
4 have been noted to have higher than market prices.<sup>27</sup> By law, GPO products received preferential  
5 status by hospital purchasers,<sup>28</sup> which negates the incentive to prescribe cheaper alternatives  
6 under the capitated payment system. While the increase in GPO products and the UCS  
7 implementation may be a coincidence in timing, it is noteworthy that the GPO expanded its  
8 product line at a time when the UCS policy expanded the market of people who could afford  
9 medicines.

10  
11  
12  
13  
14  
15  
16  
17  
18  
19  
20  
21  
22  
23  
24  
25  
26  
27  
28  
29  
30  
31  
32  
33  
34  
35  
36  
37  
38  
39  
40  
41  
42  
43  
44  
45  
46  
47  
48  
49  
50  
51  
52  
53  
54  
55  
56  
57  
58  
59  
60

9 Our study demonstrates the value of IMS Health market intelligence data for rigorous health  
10 policy evaluation. Unlike other sources of data on pharmaceutical utilization (i.e., national health  
11 surveys or ad hoc hospital surveys), IMS data represent country pharmaceutical markets  
12 consistently over time and are useful for the evaluation of system-wide interventions.  
13 Nevertheless, the data pose some limitations. Aggregate national sales data do not allow us to  
14 determine whether observed increases in medicines sales occurred preferentially among UCS  
15 enrollees or enrollees in the SHI and CSMBS schemes, conceivably to compensate for financial  
16 strain of the UCS on hospital budgets.<sup>6</sup> CSMBS expenditures increased following UCS  
17 implementation<sup>29</sup> and increased medicines sales among CSMBS enrollees, reimbursed on a fee-  
18 for-service basis, could explain increases in non-NLEM medicines and medicines with less  
19 expensive therapeutic alternatives.<sup>5</sup> However, it is unlikely that increased utilization among  
20 CSMBS enrollees explains most of the observed volume changes since this would imply that  
21 one-half (for diabetes) to three-quarters (for hypertension) of CSMBS members (7.1% of the  
22 total population in 2004<sup>6</sup>) were on these treatments in 2004. Even the CSMBS and SSI schemes  
23 combined (20.3% of the total population in 2004<sup>6</sup>) are unlikely to be responsible for the observed  
24 changes since this would imply that one-quarter (for diabetes) and one-third (for hypertension) of  
25 enrollees in the two schemes were on these treatments in 2004. These estimates are much higher  
26 than the national prevalence (6.7% for diabetes<sup>30</sup> and 22.0% for hypertension<sup>31</sup> in 2004) and  
27 unlikely in the civil servant and private sector workforce populations, which are likely to be  
28 healthier and wealthier than the national average.

30 Our interpretation of the observed changes assumes that pharmaceutical sales to hospital and  
31 retail pharmacies reflected total market utilization, and that hospital sales volumes included

1 utilization at affiliated primary care units. This assumption seems justified in light of the  
2 estimated 91% accuracy of IMS Health data in representing the Thai pharmaceutical market.<sup>32</sup>  
3 For local generic products, including those produced by the GPO, IMS Health data are based on  
4 pharmacy surveys only (as opposed to pharmacy surveys and manufacturer reports), so we may  
5 have underestimated utilization. However, unless this systematic underestimation changed at the  
6 point of the UCS implementation, it would not have impacted our results. Finally, since we did  
7 not convert standard units of product sold to defined daily doses (DDD), we do not describe sales  
8 changes in terms of average adult doses.

9  
10 There are also potential limitations due to study design and statistical analysis. We addressed the  
11 main threat to the internal validity of the interrupted time series design – a concurrent event that  
12 affects the outcome of interest – by assessing other policies or market events that occurred at the  
13 time of the UCS, through literature reviews, discussions with in-country experts, and by  
14 including the retail sector as a comparison. The statistical approach, segmented regression  
15 analysis, usually assumes a linear trend and well-defined break point. Sensitivity analyses that  
16 varied model specification and intervention duration did not change the findings. By reporting  
17 results from fully-specified models, we may have underestimated the statistical significance of  
18 one- and five-year change estimates.

19  
20 While both the context and the implementation of universal coverage in Thailand are unique and  
21 not necessarily generalizable to other LMICs, our findings suggest that expanding health  
22 insurance coverage with a medicines benefit to the entire population, together with changes in  
23 the payment system and increased local manufacturing, increased the per capita volume of  
24 medicines sold and, by inference, improved access to medicines in the primary care sector in  
25 Thailand, presumably by making medicines more affordable. Since the study period, Thailand  
26 has enacted further policies to address pharmaceutical sector cost escalation (e.g., strict  
27 enforcement of reimbursement for only NLEM medicines in the CSMBS<sup>33</sup>) and to ensure  
28 appropriate access to non-NLEM medicines (e.g., coverage of medicines for HIV, renal  
29 replacement therapy, and mental health conditions).<sup>34–36</sup> In the future, it will be important for  
30 Thailand and other countries to assess equity in access to and quality of use of medicines,

1  
2  
3  
4  
5  
6  
7  
8  
9  
10  
11  
12  
13  
14  
15  
16  
17  
18  
19  
20  
21  
22  
23  
24  
25  
26  
27  
28  
29  
30  
31  
32  
33  
34  
35  
36  
37  
38  
39  
40  
41  
42  
43  
44  
45  
46  
47  
48  
49  
50  
51  
52  
53  
54  
55  
56  
57  
58  
59  
60

1 availability of medicines in health centers and hospitals, out-of-pocket and system expenditures  
2 and affordability, and health outcomes as they pursue policies to achieve universal coverage.

For peer review only

## References

- 1 World Health Organization. Resolution from the fifty-eight World Health Assembly. Sustainable health financing, universal coverage and social health insurance (WHA58.33) [Internet]. 2005 [cited 2011 Mar 8]. Available from: [http://www.who.int/providingforhealth/topics/WHA58\\_33-en.pdf](http://www.who.int/providingforhealth/topics/WHA58_33-en.pdf).
- 2 World Health Organization. 2010 World Health Report: Health systems financing: the path to universal coverage [Internet]. 2010 [cited 2011 Mar 8]. Available from: <http://www.who.int/whr/2010/en/index.html>.
- 3 J. Quick. Ensuring access to essential medicines in developing countries—A framework for action. *Clinical Pharmacology and Therapeutics*. 2003;73(4): 279–283.
- 4 Faden L, Vialle-Valentin C, Ross-Degnan D, Wagner A. Active pharmaceutical management strategies of health insurance systems to improve cost-effective use of medicines in low- and middle-income countries: a systematic review of current evidence. *Health Policy*. 2011;100(2-3):134-143.
- 5 Hirunrassamee S, Ratanawijitrasin S. Does your health care depend on how your insurer pays providers? Variation in utilization and outcomes in Thailand. *Int J Health Care Finance Econ*. 2009;9(2):153-168.
- 6 Hughes D, Leethongdee S. Universal coverage in the land of smiles: lessons from Thailand's 30 Baht health reforms. *Health Aff (Millwood)*. 2007;26(4):999-1008.
- 7 The Rockefeller Foundation. Catalyzing Change: The System Reform Costs of Universal Health Coverage [Internet]. 2010 Nov 15 [cited on 2011 Mar 8]. Available from: <http://www.rockefellerfoundation.org/news/publications/catalyzing-change-system-reform-costs>.
- 8 Tangcharoensathien V, Prakongsai P, Limwattanon S, Patcharanarumoi W, Jongudomsuk P. Achieving universal coverage in Thailand: what lessons do we learn? [Internet]. 2007 March [cited on 2012 September 25]. Available from: [http://www.who.int/social\\_determinants/resources/csdh\\_media/universal\\_coverage\\_thailand\\_2007\\_en.pdf](http://www.who.int/social_determinants/resources/csdh_media/universal_coverage_thailand_2007_en.pdf)
- 9 Tangcharoensathien V, Wibulpholprasert S, Nitayaramphong S. Knowledge-based changes to health systems: the Thai experience in policy development. *Bull. World Health Organ*. 2004;82(10):750-756.
- 10 Pitaknetinan K, Tangcharoensathien V, Supachutikul A, Bennett S, Mills A. Profit, payment and pharmaceutical practices: Perspectives from hospitals in Bangkok. *Health Policy*. 1999;46(3):179–194.
- 11 World Bank. Waivers and exemptions for health services in developing countries [Internet]. 2002 October [cited on 2012 October 1]. Available from:

- 1  
2  
3 1 [http://siteresources.worldbank.org/SOCIALPROTECTION/Resources/SP-Discussion-](http://siteresources.worldbank.org/SOCIALPROTECTION/Resources/SP-Discussion-papers/Safety-Nets-DP/0308.pdf)  
4 2 [papers/Safety-Nets-DP/0308.pdf](http://siteresources.worldbank.org/SOCIALPROTECTION/Resources/SP-Discussion-papers/Safety-Nets-DP/0308.pdf)  
5 3  
6 4  
7 4 12 NaRanong V, NaRanong, A, Treamworakul S. Universal Health Coverage Schemes in  
8 5 Thailand 2002-2003. Research Report No.1: Monitoring and Evaluating Universal Health  
9 6 Care Coverage in Thailand, Phase II, 2003-04. Bangkok: Thailand Development  
10 7 Research Institute; 2004.  
11 8  
12 9 13 Kaufman N, Chasombat S, Tanomsingh S, Rajataramya B, Potempa K. Public health in  
13 10 Thailand: emerging focus on non-communicable diseases. *Int J Health Plann Manage*.  
14 11 2011; 26(3): e197-212  
15 12  
16 13 14 Bundhamcharoen K, Odton P, Phulkerd S, Tangcharoensathien V. Burden of disease in  
17 14 Thailand: changes in health gap between 1999 and 2004. *BMC Public Health*.  
18 15 2011;11:53.  
19 16  
20 17 15 World Health Organization. Thailand: Health Profile [Internet]. 2011 Apr 11 [cited 2012  
21 18 Feb 8]. Available from: <http://www.who.int/gho/countries/tha.pdf>  
22 19  
23 20 16 Porapakkham Y, Rao C, Pattaraarchachai J, et al. Estimated causes of death in Thailand,  
24 21 2005: implications for health policy. *Population Health Metrics*. 2010;8(1):14.  
25 22  
26 23 17 Beaglehole R, Bonita R, Horton R, et al. Priority actions for the non-communicable  
27 24 disease crisis. *Lancet*. 2011;377(9775):1438-1447.  
28 25  
29 26 18 IMS Health MIDAS. 1998-2006.  
30 27  
31 28 19 European Pharmaceutical Market Research Association (EphMRA). Anatomical  
32 29 Classification [Internet]. 2012 [cited 2012 Feb 6]. Available from:  
33 30 <http://www.ephmra.org/classification/anatomical-classification.aspx>  
34 31  
35 32 20 The World Bank. Data [Internet]. 2011 [cited 2011 May13]. Available from:  
36 33 <http://data.worldbank.org/>  
37 34  
38 35 21 Wagner AK, Soumerai SB, Zhang F, Ross-Degnan D. Segmented regression analysis of  
39 36 interrupted time series studies in medication use research. *J Clin Pharm Ther*.  
40 37 2002;27(4):299-309.  
41 38  
42 39 22 Shadish WR, Cook TD, Campbell DT. Experimental and quasi-experimental designs for  
43 40 generalized causal inference. Boston: Houghton Mifflin Company; 2002.  
44 41  
45 42 23 Zhang F, Wagner AK, Soumerai SB, Ross-Degnan D. Methods for estimating confidence  
46 43 intervals in interrupted time series analyses of health interventions. *J Clin Epidemiol*.  
47 44 2009;62(2):143-148.  
48 45  
49  
50  
51  
52  
53  
54  
55  
56  
57  
58  
59  
60

- 1  
2  
3 1 24 United States. Food and Drug Agency. Recall of Interferon alfa-2b, (Recombinant),  
4 2 Powder for Injection, Intron A - (Schering Corporation) [Internet]. 2001 Oct 22 [cited 13  
5 3 Oct 2011]. Available from:  
6 4 [http://www.fda.gov/Drugs/DevelopmentApprovalProcess/HowDrugsareDevelopedandAp  
7 5 proved/ApprovalApplications/TherapeuticBiologicApplications/ucm113617.htm](http://www.fda.gov/Drugs/DevelopmentApprovalProcess/HowDrugsareDevelopedandApproved/ApprovalApplications/TherapeuticBiologicApplications/ucm113617.htm)  
8 6  
9 7  
10 8 25 Damrongplisit K, Melnick GA. Early results from Thailand's 30 Baht Health Reform:  
11 9 something to smile about. *Health Aff (Millwood)*. 2009;28(3):w457-466.  
12 10  
13 11 26 Yiengprugsawan V, Carmichael G, Lim L, Seubsman S, Sleigh A. Explanation of  
14 12 inequality in utilization of ambulatory care before and after universal health insurance in  
15 13 Thailand. *Health Policy Plan*. 2011; 26(2): 105-14.  
16 14  
17 15 27 Ten Kate D. Safe at any costs? Asia Sentinel (Hong Kong) [Internet]. 2001 Jan 4 [cited  
18 16 2012 Feb 6]. Available from:  
19 17 [http://www.asiasentinel.com/index.php?option=com\\_content&task=view&id=351&Item  
20 18 id=392](http://www.asiasentinel.com/index.php?option=com_content&task=view&id=351&Itemid=392)  
21 19  
22 20 28 Ratanawijitrasin S. Pharmaceutical policy in Thailand: a review of three decades of  
23 21 government interventions. In: Eggleston K, editor. Prescribing cultures and  
24 22 pharmaceutical policy in the Asia Pacific. Stanford: The Walter H. Shorenstein Asia-  
25 23 Pacific Research Center Books; 2009. p. 79–106.  
26 24  
27 25 29 Tangcharoensathien V, Jongudomsuk P. From policy to implementation: Historical  
28 26 events during 2001-2011 of universal coverage in Thailand. Bangkok, Thailand:  
29 27 National Health Security Office; 2012.  
30 28  
31 29 30 Aekplakorn W, Abbott-Klafter J, Premgamone A, et al. Prevalence and management of  
32 30 diabetes and associated risk factors by regions of Thailand: Third National Health  
33 31 Examination Survey 2004. *Diabetes Care*. 2007;30:2007–2012  
34 32  
35 33 31 Aekplakorn W, Abbott-Klafter J, Khonputsra P, Tatsanavivat P, Chongsuvivatwong V,  
36 34 Chariyalertsak S, et al. Prevalence and management of prehypertension and hypertension  
37 35 by geographic regions of Thailand: the Third National Health Examination Survey, 2004.  
38 36 *J Hypertens*. 2008; 26:191–198.  
39 37  
40 38 32 IMS Health. IMS Thailand Market Prognosis. 2012.  
41 39  
42 40 33 IMS Health. Pharma Pricing and Reimbursement. 2011 Mar; 16(3).  
43 41  
44 42 34 Khanna R. Universal Health Coverage in Thailand: What Lessons Can India Learn?  
45 43 [Internet]. 2010 Dec 16 [cited 2012 Feb 7]. Available from:  
46 44 <http://www.mfcindia.org/main/bgpapers/bgpapers2011/am/bgpap2011r.pdf>  
47  
48  
49  
50  
51  
52  
53  
54  
55  
56  
57  
58  
59  
60



1  
2  
3  
4  
5  
6  
7  
8  
9  
10  
11  
12  
13  
14  
15  
16  
17  
18  
19  
20  
21  
22  
23  
24  
25  
26  
27  
28  
29  
30  
31  
32  
33  
34  
35  
36  
37  
38  
39  
40  
41  
42  
43  
44  
45  
46  
47  
48  
49  
50  
51  
52  
53  
54  
55  
56  
57  
58  
59  
60

- 1 35 Treerutkuarkul A. Thailand: health care for all, at a price. *Bull World Health Organ.*  
2 2010; 88(2): 84-5.  
3  
4  
5  
6  
7 4 36 Pitayarangsarit S. The Introduction of the Universal Coverage of Health Care Policy in  
8 5 Thailand: Policy Responses [PhD thesis]. London, UK: London School of Hygiene and  
9 6 Tropical Medicine; 2004 [cited 2012 Feb 7]. Available from:  
10 7 [http://www.nhso.go.th/eng/download/The%20Introduction%20of%20the%20Universal%20Coverage%20of%20Health%20Care%20Policy%20in%20Thailand\\_%20Policy%20Re](http://www.nhso.go.th/eng/download/The%20Introduction%20of%20the%20Universal%20Coverage%20of%20Health%20Care%20Policy%20in%20Thailand_%20Policy%20Responses.pdf)  
11 8  
12 9  
13 10  
14 11  
15 12  
16 13  
17 14  
18 15  
19 16  
20 17  
21 18  
22 19  
23 20  
24 21  
25 22  
26 23  
27 24  
28 25  
29 26  
30 27  
31 28  
32 29  
33 30  
34 31  
35 32  
36 33  
37 34  
38 35  
39 36  
40 37  
41 38  
42 39  
43 40  
44 41  
45 42  
46 43  
47 44  
48 45  
49 46

For peer review only

## TABLES

2

**Table 1. Summary of the Impact of the Universal Coverage Scheme on Volume in the Hospital Sector (from segmented regression results) \***

| Therapeutic Area              | Pre-policy trend | Immediate change after policy | Post-policy trend change |
|-------------------------------|------------------|-------------------------------|--------------------------|
| <b>DIABETES</b>               |                  |                               |                          |
| Antidiabetics**               | ↑                |                               | ↑                        |
| Insulins**                    | ↑                | ↑                             | ↑                        |
| <b>CARDIOVASCULAR DISEASE</b> |                  |                               |                          |
| Antihypertensives             | ↑                | ↓                             | ↑                        |
| Lipid Regulating Agents**     | ↑                |                               | ↑                        |
| Cardiac Therapy               | ↑                | ↓                             |                          |
| <b>CANCER</b>                 |                  |                               |                          |
| Antineoplastics               | ↑                |                               |                          |
| Cytostatic Hormones           | ↑                |                               | ↑                        |
| Immunostimulating Agents**    | ↑                | ↓                             |                          |

\*Arrows signify a statistically significant coefficient ( $p < 0.05$ ) from segmented regression with linear post-policy trend term, unless noted otherwise.

\*\*Quadratic model (which has a squared post-policy trend term) fits better than linear model.

Note: See online appendix Table 2 and Figures 1-8 for regression coefficients and figures for all therapeutic areas.

8

9

**Table 2. Relative Impact of UCS on Sales of Medicines by Class (one and five years post policy)\***

| Therapeutic Class        | One Year Impact (in standard units) |          |                              | Five Year Impact (in standard units) |          |                              |
|--------------------------|-------------------------------------|----------|------------------------------|--------------------------------------|----------|------------------------------|
|                          | Predicted                           | Observed | Relative Change (95% CI)     | Predicted                            | Observed | Relative Change (95% CI)     |
| Antidiabetics            | 2602.91                             | 2769.79  | 6.4% (-6.9, 19.7)            | 3669.13                              | 5090.62  | <b>38.7% (13.5, 64.0)</b>    |
| Insulins                 | 3.30                                | 4.45     | <b>34.8% (15.1, 54.5)</b>    | 4.58                                 | 12.56    | <b>174.4% (113.9, 235.0)</b> |
| Cardiac Therapy Agents   | 699.28                              | 607.27   | -13.2% (-26.9, 0.6)          | 908.12                               | 825.49   | -9.1% (-31.9, 13.1)          |
| Lipid Regulating Agents  | 522.34                              | 504.58   | -3.4% (-19.9, 13.1)          | 781.97                               | 1629.11  | <b>108.3% (59.8, 156.9)</b>  |
| Antihypertensives        | 3521.47                             | 3418.79  | -2.9% (-15.5, 9.7)           | 5200.86                              | 6177.49  | 18.8% (-2.8, 40.3)**         |
| Antineoplastics          | 35.38                               | 34.21    | -3.3% (-15.4, 8.7)           | 46.14                                | 48.13    | 4.3% (-16.3, 24.9)           |
| Cytostatic Hormones      | 29.48                               | 30.58    | 3.7% (-10.1, 17.6)           | 39.82                                | 47.52    | 19.3% (-5.1, 43.8)           |
| Immunostimulating Agents | 0.65                                | 0.43     | <b>-35.0% (-45.1, -25.0)</b> | 0.81                                 | 0.60     | <b>-26.3% (-45.0, -7.6)</b>  |

\*Bold signifies that the change is statistically significant (i.e., confidence interval does not include the null value of 0).

\*\*The absolute five-year difference, which is estimated using more precise method, is significant. See online appendix Table 3.

13

14

15

16

17

1 **Table 3. Immediate Impact of UCS on Hospital Sector Market Share\***

| Therapeutic Area                | Licensing Status   | Immediate post-policy absolute change in % market share (95% CI) |
|---------------------------------|--------------------|------------------------------------------------------------------|
| <b>DIABETES</b>                 |                    |                                                                  |
| <b>Antidiabetics</b>            | Originator brand   | -0.3% (-1.6, 1.0)                                                |
|                                 | Branded generic    | <b>-12.3% (-16.0, -8.7)</b>                                      |
|                                 | Generic            | <b>-3.5% (-5.8, -1.1)</b>                                        |
|                                 | GPO                | <b>16.1% (12.0, 20.2)</b>                                        |
| <b>Insulins***</b>              | Originator brand** | -0.04% (-0.4, 0.3)                                               |
|                                 | Branded generic    | <b>7.0% (2.9, 11.1)</b>                                          |
|                                 | Generic            | <b>-6.2% (-10.3, -2.1)</b>                                       |
| <b>CARDIOVASCULAR DISEASE</b>   |                    |                                                                  |
| <b>Antihypertensives</b>        | Originator brand** | -0.1% (-2.3, 2.0)                                                |
|                                 | Branded generic**  | -0.2% (-6.1, 1.8)                                                |
|                                 | Generic            | <b>-5.7% (-8.3, -3.0)</b>                                        |
|                                 | GPO                | 5.3% (-0.1, 10.6)                                                |
| <b>Lipid Regulating Agents</b>  | Originator brand** | <b>-7.8% (-10.2, -5.4)</b>                                       |
|                                 | Branded generic**  | <b>7.6% (5.1, 10.0)</b>                                          |
|                                 | Generic            | 0.2% (-0.4, 0.7)                                                 |
|                                 | GPO                | 0.2% (-0.3, 0.8)                                                 |
| <b>Cardiac Therapy</b>          | Originator brand   | 0.1% (-0.8, 1.0)                                                 |
|                                 | Branded generic**  | <b>-13.5% (-20.5, -6.5)</b>                                      |
|                                 | Generic            | <b>-4.3% (-6.2, -2.4)</b>                                        |
|                                 | GPO                | <b>21.6% (15.0, 28.1)</b>                                        |
| <b>CANCER***</b>                |                    |                                                                  |
| <b>Antineoplastics</b>          | Originator brand   | 1.1% (-1.0, 3.2)                                                 |
|                                 | Branded generic    | -1.0% (-5.4, 3.4)                                                |
|                                 | Generic            | 0.4% (-2.7, 3.4)                                                 |
| <b>Cytostatic Hormones</b>      | Originator brand** | 0.4% (-5.4, 6.1)                                                 |
|                                 | Branded generic**  | <b>-7.7% (-12.0, -3.5)</b>                                       |
|                                 | Generic**          | <b>6.0% (1.4, 10.6)</b>                                          |
| <b>Immunostimulating Agents</b> | Originator brand   | <b>-6.4% (-9.7, -3.0)</b>                                        |
|                                 | Branded generic    | <b>4.5% (1.7, 7.3)</b>                                           |
|                                 | Generic            | -0.2% (-0.3, 0.02)                                               |

2 \***Bold** signifies a statistically significant regression coefficient ( $p < 0.05$ ). Changes are in absolute terms (i.e., percentage point change).

3 \*\*Quadratic model (which has a squared post-policy term) fits better than linear model.

4 \*\*\*GPO did not produce any insulins or cancer medicines during the study period.

5 Note 1: See online appendix Table 4 and Figures 9-16 for market share regression coefficients and figures for all therapeutic areas

6 Note 2: Aside from the immediate level changes following the policy, there were few major changes in market share. See online appendix, Table 5 for absolute one- and five-year differences.

1  
2  
3 **Figure Index (attached in separate document):\***

4 **Figure 1.** Standard Units Per Capita by Quarter: Insulin (Hospital vs. Retail)

6 **Figure 2.** Standard Units Per Capita by Quarter: Antihypertensives (Hospital vs. Retail)

8 **Figure 3.** Licensing Status Market Share by Quarter: Antidiabetics (Hospital Sector)

10 **Figure 4.** Licensing Status Market Share by Quarter: Cardiac Therapy Products (Hospital Sector)

11 \*The grey box in each figure represents the 3-quarter UCS roll-out period.

12  
13 **Online appendix (attached in separate document)**

Appendix Table 1. List of Medicines by ATC

| Therapeutic Area            | Classification for Analysis | Molecule Name                                       | ATC2 Classification          | ATC4 Classification              |
|-----------------------------|-----------------------------|-----------------------------------------------------|------------------------------|----------------------------------|
| <b>DIABETES</b>             |                             |                                                     |                              |                                  |
|                             | Antidiabetics               | ACARBOSE                                            | A10 (DRUGS USED IN DIABETES) | A10L0 (A-GLUCOSIDASE INH A-DIAB) |
|                             | Antidiabetics               | BUFORMIN                                            | A10 (DRUGS USED IN DIABETES) | A10J1 (BIGUANIDE A-DIABS PLAIN)  |
|                             | Antidiabetics               | CHLORPROPAMIDE                                      | A10 (DRUGS USED IN DIABETES) | A10H0 (SULPHONYLUREA A-DIABS)    |
|                             | Antidiabetics               | EXENATIDE                                           | A10 (DRUGS USED IN DIABETES) | A10S0 (GLP-1 AGONIST A-DIABS)    |
|                             | Antidiabetics               | GLIBENCLAMIDE                                       | A10 (DRUGS USED IN DIABETES) | A10H0 (SULPHONYLUREA A-DIABS )   |
|                             | Antidiabetics               | GLIBENCLAMIDE#METFORMIN                             | A10 (DRUGS USED IN DIABETES) | A10J2 (BIGUANIDE & S-UREA COMBS) |
|                             | Antidiabetics               | GLICLAZIDE                                          | A10 (DRUGS USED IN DIABETES) | A10H0 (SULPHONYLUREA A-DIABS)    |
|                             | Antidiabetics               | GLICLAZIDE#METFORMIN                                | A10 (DRUGS USED IN DIABETES) | A10J2 (BIGUANIDE & S-UREA COMBS) |
|                             | Antidiabetics               | GLIMEPIRIDE                                         | A10 (DRUGS USED IN DIABETES) | A10H0 (SULPHONYLUREA A-DIABS)    |
|                             | Antidiabetics               | GLIMEPIRIDE#METFORMIN                               | A10 (DRUGS USED IN DIABETES) | A10J2 (BIGUANIDE & S-UREA COMBS) |
|                             | Antidiabetics               | GLIMEPIRIDE#ROSIGLITAZONE                           | A10 (DRUGS USED IN DIABETES) | A10K2 (GLITAZONE & S-UREA COMBS) |
|                             | Antidiabetics               | GLIPIZIDE                                           | A10 (DRUGS USED IN DIABETES) | A10H0 (SULPHONYLUREA A-DIABS)    |
|                             | Antidiabetics               | GLIQUIDONE                                          | A10 (DRUGS USED IN DIABETES) | A10H0 (SULPHONYLUREA A-DIABS)    |
|                             | Antidiabetics               | METFORMIN                                           | A10 (DRUGS USED IN DIABETES) | A10J1 (BIGUANIDE A-DIABS PLAIN)  |
|                             | Antidiabetics               | METFORMIN#PIOGLITAZONE                              | A10 (DRUGS USED IN DIABETES) | A10K3 (GLITAZONE & BIGUAN COMBS) |
|                             | Antidiabetics               | METFORMIN#ROSIGLITAZONE                             | A10 (DRUGS USED IN DIABETES) | A10K3 (GLITAZONE & BIGUAN COMBS) |
|                             | Antidiabetics               | METFORMIN#SITAGLIPTIN                               | A10 (DRUGS USED IN DIABETES) | A10N3 (DPP-IV INH & BIGUAN COMB) |
|                             | Antidiabetics               | METFORMIN#VILDAGLIPTIN                              | A10 (DRUGS USED IN DIABETES) | A10N3 (DPP-IV INH & BIGUAN COMB) |
|                             | Antidiabetics               | PIOGLITAZONE                                        | A10 (DRUGS USED IN DIABETES) | A10K1 (GLITAZONE A-DIABS PLAIN)  |
|                             | Antidiabetics               | REPAGLINIDE                                         | A10 (DRUGS USED IN DIABETES) | A10M1 (GLINIDE A-DIABS PLAIN)    |
|                             | Antidiabetics               | ROSIGLITAZONE                                       | A10 (DRUGS USED IN DIABETES) | A10K1 (GLITAZONE A-DIABS PLAIN)  |
|                             | Antidiabetics               | SITAGLIPTIN                                         | A10 (DRUGS USED IN DIABETES) | A10N1 (DPP-IV INH A-DIAB PLAIN)  |
|                             | Antidiabetics               | VILDAGLIPTIN                                        | A10 (DRUGS USED IN DIABETES) | A10N1 (DPP-IV INH A-DIAB PLAIN)  |
|                             | Antidiabetics               | VOGLIBOSE                                           | A10 (DRUGS USED IN DIABETES) | A10L0 (A-GLUCOSIDASE INH A-DIAB) |
|                             | Insulins                    | INSULIN ASPART                                      | A10 (DRUGS USED IN DIABETES) | A10C1 (H INSUL+ANG FAST ACT)     |
|                             | Insulins                    | INSULIN ASPART#INSULIN ASPART PROTAMINE CRYSTALLINE | A10 (DRUGS USED IN DIABETES) | A10C3 (H INSUL+ANG INT+FAST ACT) |
|                             | Insulins                    | INSULIN DETEMIR                                     | A10 (DRUGS USED IN DIABETES) | A10C5 (H INSUL+ANG LONG ACT)     |
|                             | Insulins                    | INSULIN GLARGINE                                    | A10 (DRUGS USED IN DIABETES) | A10C5 (H INSUL+ANG LONG ACT)     |
|                             | Insulins                    | INSULIN HUMAN BASE                                  | A10 (DRUGS USED IN DIABETES) | A10C1 (H INSUL+ANG FAST ACT)     |
|                             | Insulins                    | INSULIN HUMAN BASE#INSULIN HUMAN ISOPHANE           | A10 (DRUGS USED IN DIABETES) | A10C3 (H INSUL+ANG INT+FAST ACT) |
|                             | Insulins                    | INSULIN HUMAN ISOPHANE                              | A10 (DRUGS USED IN DIABETES) | A10C2 (H INSUL+ANG INTERMED ACT) |
|                             | Insulins                    | INSULIN HUMAN ZINC SUSPENSION (COMPOUND)            | A10 (DRUGS USED IN DIABETES) | A10C4 (H INSUL+ANG INT+LONG ACT) |
|                             | Insulins                    | INSULIN HUMAN ZINC SUSPENSION (CRYSTALLINE)         | A10 (DRUGS USED IN DIABETES) | A10C5 (H INSUL+ANG LONG ACT)     |
|                             | Insulins                    | INSULIN LISPRO                                      | A10 (DRUGS USED IN DIABETES) | A10C1 (H INSUL+ANG FAST ACT)     |
|                             | Insulins                    | INSULIN LISPRO#INSULIN LISPRO PROTAMINE             | A10 (DRUGS USED IN DIABETES) | A10C1 (H INSUL+ANG FAST ACT )    |
|                             | Insulins                    | INSULIN PORCINE BASE                                | A10 (DRUGS USED IN DIABETES) | A10D0 (ANIMAL INSULINS)          |
|                             | Insulins                    | INSULIN PORCINE ISOPHANE                            | A10 (DRUGS USED IN DIABETES) | A10D0 (ANIMAL INSULINS)          |
|                             | Insulins                    | INSULIN PORCINE ZINC SUSPENSION (COMPOUND)          | A10 (DRUGS USED IN DIABETES) | A10D0 (ANIMAL INSULINS )         |
| <b>CAROVASCULAR DISEASE</b> |                             |                                                     |                              |                                  |
|                             | Antihypertensives           | AJMALICINE#BUTIZIDE#RESCINNAMINE#RESERPINE          | C2 (ANTIHYPERTENSIVES)       | C2D0 (RAUWOLF ALK+OTH COM+DIUR)  |
|                             | Antihypertensives           | BUNAZOSIN                                           | C2 (ANTIHYPERTENSIVES)       | C2A2 (ANTIHYPER.PL MAINLY PERI)  |
|                             | Antihypertensives           | CLONIDINE                                           | C2 (ANTIHYPERTENSIVES)       | C2A1 (ANTIHYPER.PL MAINLY CENT)  |
|                             | Antihypertensives           | CLOPAMIDE#DIHYDROERGOCRISTINE#RESERPINE             | C2 (ANTIHYPERTENSIVES)       | C2D0 (RAUWOLF ALK+OTH COM+DIUR)  |
|                             | Antihypertensives           | CLOPAMIDE#RESERPINE                                 | C2 (ANTIHYPERTENSIVES)       | C2D0 (RAUWOLF ALK+OTH COM+DIUR)  |

|    |                   |                                                       |                           |                                 |
|----|-------------------|-------------------------------------------------------|---------------------------|---------------------------------|
| 1  | Antihypertensives | DIHYDRALAZINE                                         | C2 (ANTIHYPERTENSIVES)    | C2A2 (ANTIHYPER.PL MAINLY PERI) |
| 2  | Antihypertensives | DOXAZOSIN                                             | C2 (ANTIHYPERTENSIVES)    | C2A2 (ANTIHYPER.PL MAINLY PERI) |
| 3  | Antihypertensives | HYDRALAZINE                                           | C2 (ANTIHYPERTENSIVES)    | C2A2 (ANTIHYPER.PL MAINLY PERI) |
| 4  | Antihypertensives | HYDRALAZINE#HYDROCHLOROTHIAZIDE#RESERPINE             | C2 (ANTIHYPERTENSIVES)    | C2B2 (A-HYPERT(N V)MAINLY PERI) |
| 5  | Antihypertensives | KETANSERIN                                            | C2 (ANTIHYPERTENSIVES)    | C2A2 (ANTIHYPER.PL MAINLY PERI) |
| 6  | Antihypertensives | METHYLDOPA                                            | C2 (ANTIHYPERTENSIVES)    | C2A1 (ANTIHYPER.PL MAINLY CENT) |
| 7  | Antihypertensives | MINOXIDIL                                             | C2 (ANTIHYPERTENSIVES)    | C2A2 (ANTIHYPER.PL MAINLY PERI) |
| 8  | Antihypertensives | NITROPRUSSIDE                                         | C2 (ANTIHYPERTENSIVES)    | C2A2 (ANTIHYPER.PL MAINLY PERI) |
| 9  | Antihypertensives | PRAZOSIN                                              | C2 (ANTIHYPERTENSIVES)    | C2A2 (ANTIHYPER.PL MAINLY PERI) |
| 10 | Antihypertensives | RESERPINE                                             | C2 (ANTIHYPERTENSIVES)    | C2C0 (RAUWLF ALK+OTH A-HY HERB) |
| 11 | Antihypertensives | RILMENIDINE                                           | C2 (ANTIHYPERTENSIVES)    | C2A1 (ANTIHYPER.PL MAINLY CENT) |
| 12 | Antihypertensives | 1-PROPANOL                                            | C7 (BETA BLOCKING AGENTS) | C7A0 (B-BLOCKING AGENTS,PLAIN)  |
| 13 | Antihypertensives | AMILORIDE#HYDROCHLOROTHIAZIDE#TIMOLOL                 | C7 (BETA BLOCKING AGENTS) | C7B1 (B-BLOCK COMB HYPOT/DIURT) |
| 14 | Antihypertensives | ATENOLOL                                              | C7 (BETA BLOCKING AGENTS) | C7A0 (B-BLOCKING AGENTS,PLAIN)  |
| 15 | Antihypertensives | ATENOLOL#CHLORTALIDONE                                | C7 (BETA BLOCKING AGENTS) | C7B1 (B-BLOCK COMB HYPOT/DIURT) |
| 16 | Antihypertensives | BETAXOLOL                                             | C7 (BETA BLOCKING AGENTS) | C7A0 (B-BLOCKING AGENTS,PLAIN)  |
| 17 | Antihypertensives | BISOPROLOL                                            | C7 (BETA BLOCKING AGENTS) | C7A0 (B-BLOCKING AGENTS,PLAIN)  |
| 18 | Antihypertensives | BISOPROLOL#HYDROCHLOROTHIAZIDE                        | C7 (BETA BLOCKING AGENTS) | C7B1 (B-BLOCK COMB HYPOT/DIURT) |
| 19 | Antihypertensives | CARVEDILOL                                            | C7 (BETA BLOCKING AGENTS) | C7A0 (B-BLOCKING AGENTS,PLAIN)  |
| 20 | Antihypertensives | CLOPAMIDE#PINDOLOL                                    | C7 (BETA BLOCKING AGENTS) | C7B1 (B-BLOCK COMB HYPOT/DIURT) |
| 21 | Antihypertensives | LABETALOL                                             | C7 (BETA BLOCKING AGENTS) | C7A0 (B-BLOCKING AGENTS,PLAIN)  |
| 22 | Antihypertensives | METOPROLOL                                            | C7 (BETA BLOCKING AGENTS) | C7A0 (B-BLOCKING AGENTS,PLAIN)  |
| 23 | Antihypertensives | NEBIVOLOL                                             | C7 (BETA BLOCKING AGENTS) | C7A0 (B-BLOCKING AGENTS,PLAIN ) |
| 24 | Antihypertensives | OPRENOLOL                                             | C7 (BETA BLOCKING AGENTS) | C7A0 (B-BLOCKING AGENTS,PLAIN ) |
| 25 | Antihypertensives | PINDOLOL                                              | C7 (BETA BLOCKING AGENTS) | C7A0 (B-BLOCKING AGENTS,PLAIN ) |
| 26 | Antihypertensives | PROPRANOLOL                                           | C7 (BETA BLOCKING AGENTS) | C7A0 (B-BLOCKING AGENTS,PLAIN ) |
| 27 | Antihypertensives | SOTALOL                                               | C7 (BETA BLOCKING AGENTS) | C7A0 (B-BLOCKING AGENTS,PLAIN ) |
| 28 | Antihypertensives | AMLODIPINE                                            | C8 (CALCIUM ANTAGONISTS)  | C8A0 (CALCIUM ANTAGONIST PLAIN) |
| 29 | Antihypertensives | ATENOLOL#NIFEDIPINE                                   | C8 (CALCIUM ANTAGONISTS)  | C8B2 (CALC ANTAG/B BLOCKR COMB) |
| 30 | Antihypertensives | BARNIDIPINE                                           | C8 (CALCIUM ANTAGONISTS)  | C8A0 (CALCIUM ANTAGONIST PLAIN) |
| 31 | Antihypertensives | DILTIAZEM                                             | C8 (CALCIUM ANTAGONISTS)  | C8A0 (CALCIUM ANTAGONIST PLAIN) |
| 32 | Antihypertensives | FELODIPINE                                            | C8 (CALCIUM ANTAGONISTS)  | C8A0 (CALCIUM ANTAGONIST PLAIN) |
| 33 | Antihypertensives | GALLOPAMIL                                            | C8 (CALCIUM ANTAGONISTS)  | C8A0 (CALCIUM ANTAGONIST PLAIN) |
| 34 | Antihypertensives | ISRADIPINE                                            | C8 (CALCIUM ANTAGONISTS)  | C8A0 (CALCIUM ANTAGONIST PLAIN) |
| 35 | Antihypertensives | LACIDIPINE                                            | C8 (CALCIUM ANTAGONISTS)  | C8A0 (CALCIUM ANTAGONIST PLAIN) |
| 36 | Antihypertensives | LERCANIDIPINE                                         | C8 (CALCIUM ANTAGONISTS)  | C8A0 (CALCIUM ANTAGONIST PLAIN) |
| 37 | Antihypertensives | MANIDIPINE                                            | C8 (CALCIUM ANTAGONISTS)  | C8A0 (CALCIUM ANTAGONIST PLAIN) |
| 38 | Antihypertensives | MIBEFRADIL                                            | C8 (CALCIUM ANTAGONISTS)  | C8A0 (CALCIUM ANTAGONIST PLAIN) |
| 39 | Antihypertensives | NICARDIPINE                                           | C8 (CALCIUM ANTAGONISTS)  | C8A0 (CALCIUM ANTAGONIST PLAIN) |
| 40 | Antihypertensives | NIFEDIPINE                                            | C8 (CALCIUM ANTAGONISTS)  | C8A0 (CALCIUM ANTAGONIST PLAIN) |
| 41 | Antihypertensives | NISOLDIPINE                                           | C8 (CALCIUM ANTAGONISTS)  | C8A0 (CALCIUM ANTAGONIST PLAIN) |
| 42 | Antihypertensives | NITRENDIPINE                                          | C8 (CALCIUM ANTAGONISTS)  | C8A0 (CALCIUM ANTAGONIST PLAIN) |
| 43 | Antihypertensives | VERAPAMIL                                             | C8 (CALCIUM ANTAGONISTS)  | C8A0 (CALCIUM ANTAGONIST PLAIN) |
| 44 | Antihypertensives | AMILORIDE                                             | C3 (DIURETICS)            | C3A1 (POT SPARING AGENTS PLAIN) |
| 45 | Antihypertensives | AMILORIDE#HYDROCHLOROTHIAZIDE                         | C3 (DIURETICS)            | C3A5 (POT SPARING+THIAZ COMBS ) |
| 46 | Antihypertensives | BAROSMA BETULINA#CAPSICUM#METHYLENE BLUE#URGINEA SCIL | C3 (DIURETICS)            | C3A6 (OTHER DIURETICS)          |
| 47 | Antihypertensives | BAROSMA BETULINA#HYOSCYAMUS ALBUS#POTASSIUM           | C3 (DIURETICS)            | C3A6 (OTHER DIURETICS)          |
|    | Antihypertensives | BENDROFLUMETHIAZIDE#POTASSIUM                         | C3 (DIURETICS)            | C3A3 (THIAZIDE+ANALOGUE PLAIN)  |
|    | Antihypertensives | BUMETANIDE                                            | C3 (DIURETICS)            | C3A2 (LOOP DIURETICS PLAIN)     |
|    | Antihypertensives | FUROSEMIDE                                            | C3 (DIURETICS)            | C3A2 (LOOP DIURETICS PLAIN)     |

|    |                   |                                           |                               |                                 |
|----|-------------------|-------------------------------------------|-------------------------------|---------------------------------|
| 1  | Antihypertensives | HYDROCHLOROTHIAZIDE                       | C3 (DIURETICS)                | C3A3 (THIAZIDE+ANALOGUE PLAIN)  |
| 2  | Antihypertensives | HYDROCHLOROTHIAZIDE#TRIAMTERENE           | C3 (DIURETICS)                | C3A5 (POT SPARING+THIAZ COMBS)  |
| 3  | Antihypertensives | INDAPAMIDE                                | C3 (DIURETICS)                | C3A3 (THIAZIDE+ANALOGUE PLAIN)  |
| 4  | Antihypertensives | SPIRONOLACTONE                            | C3 (DIURETICS)                | C3A1 (POT SPARING AGENTS PLAIN) |
| 5  | Antihypertensives | TORASEMIDE                                | C3 (DIURETICS)                | C3A2 (LOOP DIURETICS PLAIN)     |
| 6  | Antihypertensives | TRIPAMIDE                                 | C3 (DIURETICS)                | C3A3 (THIAZIDE+ANALOGUE PLAIN)  |
| 7  | Antihypertensives | XIPAMIDE                                  | C3 (DIURETICS)                | C3A3 (THIAZIDE+ANALOGUE PLAIN)  |
| 8  | Antihypertensives | ALISKIREN                                 | C9 (RENIN-ANGIOTEN SYS AGENT) | C9X0 (OTH RENIN-ANGIOTEN AGENT) |
| 9  | Antihypertensives | ALISKIREN#HYDROCHLOROTHIAZIDE             | C9 (RENIN-ANGIOTEN SYS AGENT) | C9X0 (OTH RENIN-ANGIOTEN AGENT) |
| 10 | Antihypertensives | AMLODIPINE#VALSARTAN                      | C9 (RENIN-ANGIOTEN SYS AGENT) | C9D3 (AT2 ANTG COMB CALC ANTAG) |
| 11 | Antihypertensives | CANDESARTAN CILEXETIL                     | C9 (RENIN-ANGIOTEN SYS AGENT) | C9C0 (ANGIOTEN-II ANTAG, PLAIN) |
| 12 | Antihypertensives | CANDESARTAN CILEXETIL#HYDROCHLOROTHIAZIDE | C9 (RENIN-ANGIOTEN SYS AGENT) | C9D1 (AT2 ANTG COMB C2 &/O DIU) |
| 13 | Antihypertensives | CAPTOPRIL                                 | C9 (RENIN-ANGIOTEN SYS AGENT) | C9A0 (ACE INHIBITORS PLAIN)     |
| 14 | Antihypertensives | CILAZAPRIL                                | C9 (RENIN-ANGIOTEN SYS AGENT) | C9A0 (ACE INHIBITORS PLAIN)     |
| 15 | Antihypertensives | DELAPRIL                                  | C9 (RENIN-ANGIOTEN SYS AGENT) | C9A0 (ACE INHIBITORS PLAIN)     |
| 16 | Antihypertensives | ENALAPRIL                                 | C9 (RENIN-ANGIOTEN SYS AGENT) | C9A0 (ACE INHIBITORS PLAIN)     |
| 17 | Antihypertensives | EPROSARTAN                                | C9 (RENIN-ANGIOTEN SYS AGENT) | C9C0 (ANGIOTEN-II ANTAG, PLAIN) |
| 18 | Antihypertensives | FOSINOPRIL                                | C9 (RENIN-ANGIOTEN SYS AGENT) | C9A0 (ACE INHIBITORS PLAIN)     |
| 19 | Antihypertensives | FOSINOPRIL#HYDROCHLOROTHIAZIDE            | C9 (RENIN-ANGIOTEN SYS AGENT) | C9B1 (ACE INH COMB+A-HYP/DIUR)  |
| 20 | Antihypertensives | HYDROCHLOROTHIAZIDE#IRBESARTAN            | C9 (RENIN-ANGIOTEN SYS AGENT) | C9D1 (AT2 ANTG COMB C2 &/O DIU) |
| 21 | Antihypertensives | HYDROCHLOROTHIAZIDE#LOSARTAN              | C9 (RENIN-ANGIOTEN SYS AGENT) | C9D1 (AT2 ANTG COMB C2 &/O DIU) |
| 22 | Antihypertensives | HYDROCHLOROTHIAZIDE#OLMESARTAN MEDOXOMIL  | C9 (RENIN-ANGIOTEN SYS AGENT) | C9D1 (AT2 ANTG COMB C2 &/O DIU) |
| 23 | Antihypertensives | HYDROCHLOROTHIAZIDE#QUINAPRIL             | C9 (RENIN-ANGIOTEN SYS AGENT) | C9B1 (ACE INH COMB+A-HYP/DIUR)  |
| 24 | Antihypertensives | HYDROCHLOROTHIAZIDE#RAMIPRIL              | C9 (RENIN-ANGIOTEN SYS AGENT) | C9B1 (ACE INH COMB+A-HYP/DIUR)  |
| 25 | Antihypertensives | HYDROCHLOROTHIAZIDE#TELMISARTAN           | C9 (RENIN-ANGIOTEN SYS AGENT) | C9D1 (AT2 ANTG COMB C2 &/O DIU) |
| 26 | Antihypertensives | HYDROCHLOROTHIAZIDE#VALSARTAN             | C9 (RENIN-ANGIOTEN SYS AGENT) | C9D1 (AT2 ANTG COMB C2 &/O DIU) |
| 27 | Antihypertensives | IMIDAPRIL                                 | C9 (RENIN-ANGIOTEN SYS AGENT) | C9A0 (ACE INHIBITORS PLAIN)     |
| 28 | Antihypertensives | INDAPAMIDE#PERINDOPRIL                    | C9 (RENIN-ANGIOTEN SYS AGENT) | C9B1 (ACE INH COMB+A-HYP/DIUR)  |
| 29 | Antihypertensives | IRBESARTAN                                | C9 (RENIN-ANGIOTEN SYS AGENT) | C9C0 (ANGIOTEN-II ANTAG, PLAIN) |
| 30 | Antihypertensives | LISINOPRIL                                | C9 (RENIN-ANGIOTEN SYS AGENT) | C9A0 (ACE INHIBITORS PLAIN )    |
| 31 | Antihypertensives | LOSARTAN                                  | C9 (RENIN-ANGIOTEN SYS AGENT) | C9C0 (ANGIOTEN-II ANTAG, PLAIN) |
| 32 | Antihypertensives | OLMESARTAN MEDOXOMIL                      | C9 (RENIN-ANGIOTEN SYS AGENT) | C9C0 (ANGIOTEN-II ANTAG, PLAIN) |
| 33 | Antihypertensives | PERINDOPRIL                               | C9 (RENIN-ANGIOTEN SYS AGENT) | C9A0 (ACE INHIBITORS PLAIN )    |
| 34 | Antihypertensives | QUINAPRIL                                 | C9 (RENIN-ANGIOTEN SYS AGENT) | C9A0 (ACE INHIBITORS PLAIN )    |
| 35 | Antihypertensives | RAMIPRIL                                  | C9 (RENIN-ANGIOTEN SYS AGENT) | C9A0 (ACE INHIBITORS PLAIN)     |
| 36 | Antihypertensives | TELMISARTAN                               | C9 (RENIN-ANGIOTEN SYS AGENT) | C9C0 (ANGIOTEN-II ANTAG, PLAIN) |
| 37 | Antihypertensives | VALSARTAN                                 | C9 (RENIN-ANGIOTEN SYS AGENT) | C9C0 (ANGIOTEN-II ANTAG, PLAIN) |
| 38 | Cardiac Therapy   | ADENOSINE                                 | C1 (CARDIAC THERAPY)          | C1B0 (ANTIARRHYTHMICS)          |
| 39 | Cardiac Therapy   | AMIODARONE                                | C1 (CARDIAC THERAPY)          | C1B0 (ANTIARRHYTHMICS)          |
| 40 | Cardiac Therapy   | AMRINONE                                  | C1 (CARDIAC THERAPY)          | C1F0 (POSITIVE INOTROPIC AGENT) |
| 41 | Cardiac Therapy   | CAFFEINE#ETAMIVAN                         | C1 (CARDIAC THERAPY)          | C1C1 (CARDIAC STM EX DOPAM AGT) |
| 42 | Cardiac Therapy   | DIGITALIS PURPUREA                        | C1 (CARDIAC THERAPY)          | C1A1 (CARDIAC GLYCOSIDES PLAIN) |
| 43 | Cardiac Therapy   | DIGITOXIN                                 | C1 (CARDIAC THERAPY)          | C1A1 (CARDIAC GLYCOSIDES PLAIN) |
| 44 | Cardiac Therapy   | DIGOXIN                                   | C1 (CARDIAC THERAPY)          | C1A1 (CARDIAC GLYCOSIDES PLAIN) |
| 45 | Cardiac Therapy   | DISOPYRAMIDE                              | C1 (CARDIAC THERAPY)          | C1B0 (ANTIARRHYTHMICS)          |
| 46 | Cardiac Therapy   | DOBUTAMINE                                | C1 (CARDIAC THERAPY)          | C1C2 (CARDIAC DOPAMINERG AGENT) |
| 47 | Cardiac Therapy   | DOPAMINE                                  | C1 (CARDIAC THERAPY)          | C1C2 (CARDIAC DOPAMINERG AGENT) |
| 48 | Cardiac Therapy   | EPINEPHRINE                               | C1 (CARDIAC THERAPY)          | C1C1 (CARDIAC STM EX DOPAM AGT) |
| 49 | Cardiac Therapy   | ETAFEDRINE                                | C1 (CARDIAC THERAPY)          | C1C1 (CARDIAC STM EX DOPAM AGT) |
| 50 | Cardiac Therapy   | ETILEFRINE                                | C1 (CARDIAC THERAPY)          | C1C1 (CARDIAC STM EX DOPAM AGT) |

|    |                  |                                                     |                                |                                  |
|----|------------------|-----------------------------------------------------|--------------------------------|----------------------------------|
| 1  | Cardiac Therapy  | FLECAINIDE                                          | C1 (CARDIAC THERAPY)           | C1B0 (ANTIARRHYTHMICS)           |
| 2  | Cardiac Therapy  | GLYCINE MAX#UBIDECARENONE                           | C1 (CARDIAC THERAPY)           | C1X0 (ALL OTHER CARDIAC PREPS)   |
| 3  | Cardiac Therapy  | ISOPRENALINE                                        | C1 (CARDIAC THERAPY)           | C1C1 (CARDIAC STM EX DOPAM AGT)  |
| 4  | Cardiac Therapy  | ISOSORBIDE DINITRATE                                | C1 (CARDIAC THERAPY)           | C1E0 (NITRITES AND NITRATES)     |
| 5  | Cardiac Therapy  | ISOSORBIDE MONONITRATE                              | C1 (CARDIAC THERAPY)           | C1E0 (NITRITES AND NITRATES)     |
| 6  | Cardiac Therapy  | IVABRADINE                                          | C1 (CARDIAC THERAPY)           | C1D0 (CORONRY THER EXC C AN+NI)  |
| 7  | Cardiac Therapy  | LIDOCAINE                                           | C1 (CARDIAC THERAPY)           | C1B0 (ANTIARRHYTHMICS)           |
| 8  | Cardiac Therapy  | MAGNESIUM#POTASSIUM#PROCAINE                        | C1 (CARDIAC THERAPY)           | C1X0 (ALL OTHER CARDIAC PREPS)   |
| 9  | Cardiac Therapy  | METARAMINOL                                         | C1 (CARDIAC THERAPY)           | C1C1 (CARDIAC STM EX DOPAM AGT)  |
| 10 | Cardiac Therapy  | METILDIGOXIN                                        | C1 (CARDIAC THERAPY)           | C1A1 (CARDIAC GLYCOSIDES PLAIN)  |
| 11 | Cardiac Therapy  | MEXILETINE                                          | C1 (CARDIAC THERAPY)           | C1B0 (ANTIARRHYTHMICS)           |
| 12 | Cardiac Therapy  | MIDODRINE                                           | C1 (CARDIAC THERAPY)           | C1C1 (CARDIAC STM EX DOPAM AGT)  |
| 13 | Cardiac Therapy  | MILRINONE                                           | C1 (CARDIAC THERAPY)           | C1F0 (POSITIVE INOTROPIC AGENT)  |
| 14 | Cardiac Therapy  | NITROGLYCERIN                                       | C1 (CARDIAC THERAPY)           | C1E0 (NITRITES AND NITRATES)     |
| 15 | Cardiac Therapy  | NOREPINEPHRINE                                      | C1 (CARDIAC THERAPY)           | C1C1 (CARDIAC STM EX DOPAM AGT)  |
| 16 | Cardiac Therapy  | OXYFEDRINE                                          | C1 (CARDIAC THERAPY)           | C1D0 (CORONRY THER EXC C AN+NI)  |
| 17 | Cardiac Therapy  | PENTAERYTHRITYL TETRANITRATE                        | C1 (CARDIAC THERAPY)           | C1E0 (NITRITES AND NITRATES)     |
| 18 | Cardiac Therapy  | PROCAINAMIDE                                        | C1 (CARDIAC THERAPY)           | C1B0 (ANTIARRHYTHMICS)           |
| 19 | Cardiac Therapy  | PROPAFENONE                                         | C1 (CARDIAC THERAPY)           | C1B0 (ANTIARRHYTHMICS)           |
| 20 | Cardiac Therapy  | QUINIDINE                                           | C1 (CARDIAC THERAPY)           | C1B0 (ANTIARRHYTHMICS)           |
| 21 | Cardiac Therapy  | TOCAINIDE                                           | C1 (CARDIAC THERAPY)           | C1B0 (ANTIARRHYTHMICS)           |
| 22 | Cardiac Therapy  | TRIMETAZIDINE                                       | C1 (CARDIAC THERAPY)           | C1D0 (CORONRY THER EXC C AN+NI)  |
| 23 | Cardiac Therapy  | UBIDECARENONE                                       | C1 (CARDIAC THERAPY)           | C1X0 (ALL OTHER CARDIAC PREPS)   |
| 24 | Cardiac Therapy  | UBIQUINONE(S)                                       | C1 (CARDIAC THERAPY)           | C1X0 (ALL OTHER CARDIAC PREPS)   |
| 25 | Lipid Regulating | ACIPIMOX                                            | C10 (LIP.REG./ANTI-ATH. PREPS) | C10A9 (OTH.CHOLEST&TRIGLY.REGUL) |
| 26 | Lipid Regulating | ALLIUM SATIVUM                                      | C10 (LIP.REG./ANTI-ATH. PREPS) | C10B0 (ANTI-ATHEROMA NATRL ORIG) |
| 27 | Lipid Regulating | ALLIUM SATIVUM#ARACHIS HYPOGAEA                     | C10 (LIP.REG./ANTI-ATH. PREPS) | C10B0 (ANTI-ATHEROMA NATRL ORIG) |
| 28 | Lipid Regulating | ALLIUM SATIVUM#SOYA LECITHIN                        | C10 (LIP.REG./ANTI-ATH. PREPS) | C10B0 (ANTI-ATHEROMA NATRL ORIG) |
| 29 | Lipid Regulating | AMLODIPINE#ATORVASTATIN                             | C11 (C.V. MULTITH. COMB PROD)  | C11A1 (LIPREG.CV.MULT-TH.FX.COM) |
| 30 | Lipid Regulating | ATORVASTATIN                                        | C10 (LIP.REG./ANTI-ATH. PREPS) | C10A1 (STATINS (HMG-COA RED))    |
| 31 | Lipid Regulating | BEZAFIBRATE                                         | C10 (LIP.REG./ANTI-ATH. PREPS) | C10A2 (FIBRATES)                 |
| 32 | Lipid Regulating | CERIVASTATIN                                        | C10 (LIP.REG./ANTI-ATH. PREPS) | C10A1 (STATINS (HMG-COA RED))    |
| 33 | Lipid Regulating | COLESTYRAMINE                                       | C10 (LIP.REG./ANTI-ATH. PREPS) | C10A3 (ION-EXCHANGE RESINS)      |
| 34 | Lipid Regulating | DOCOSAHEXANOIC ACID#EICOSAPENTAENOIC ACID           | C10 (LIP.REG./ANTI-ATH. PREPS) | C10B0 (ANTI-ATHEROMA NATRL ORIG) |
| 35 | Lipid Regulating | DOCOSAHEXANOIC ACID#EICOSAPENTAENOIC ACID#VITAMIN E | C10 (LIP.REG./ANTI-ATH. PREPS) | C10B0 (ANTI-ATHEROMA NATRL ORIG) |
| 36 | Lipid Regulating | EZETIMIBE                                           | C10 (LIP.REG./ANTI-ATH. PREPS) | C10A9 (OTH.CHOLEST&TRIGLY.REGUL) |
| 37 | Lipid Regulating | EZETIMIBE#SIMVASTATIN                               | C10 (LIP.REG./ANTI-ATH. PREPS) | C10C0 (LIP.REG.CO.W.OTH.LIP.REG) |
| 38 | Lipid Regulating | FENOFIBRATE                                         | C10 (LIP.REG./ANTI-ATH. PREPS) | C10A2 (FIBRATES)                 |
| 39 | Lipid Regulating | FISH                                                | C10 (LIP.REG./ANTI-ATH. PREPS) | C10B0 (ANTI-ATHEROMA NATRL ORIG) |
| 40 | Lipid Regulating | FISH#SOYA LECITHIN                                  | C10 (LIP.REG./ANTI-ATH. PREPS) | C10B0 (ANTI-ATHEROMA NATRL ORIG) |
| 41 | Lipid Regulating | FLUVASTATIN                                         | C10 (LIP.REG./ANTI-ATH. PREPS) | C10A1 (STATINS (HMG-COA RED) )   |
| 42 | Lipid Regulating | GEMFIBROZIL                                         | C10 (LIP.REG./ANTI-ATH. PREPS) | C10A2 (FIBRATES)                 |
| 43 | Lipid Regulating | LECITHIN                                            | C10 (LIP.REG./ANTI-ATH. PREPS) | C10B0 (ANTI-ATHEROMA NATRL ORIG) |
| 44 | Lipid Regulating | LECITHIN#SOYA LECITHIN                              | C10 (LIP.REG./ANTI-ATH. PREPS) | C10B0 (ANTI-ATHEROMA NATRL ORIG) |
| 45 | Lipid Regulating | NICOTINIC ACID                                      | C10 (LIP.REG./ANTI-ATH. PREPS) | C10A9 (OTH.CHOLEST&TRIGLY.REGUL) |
| 46 | Lipid Regulating | PITAVASTATIN                                        | C10 (LIP.REG./ANTI-ATH. PREPS) | C10A1 (STATINS (HMG-COA RED))    |
| 47 | Lipid Regulating | PRAVASTATIN                                         | C10 (LIP.REG./ANTI-ATH. PREPS) | C10A1 (STATINS (HMG-COA RED))    |
|    | Lipid Regulating | PROBUCOL                                            | C10 (LIP.REG./ANTI-ATH. PREPS) | C10A9 (OTH.CHOLEST&TRIGLY.REGUL) |
|    | Lipid Regulating | PYRICARBATE                                         | C10 (LIP.REG./ANTI-ATH. PREPS) | C10A9 (OTH.CHOLEST&TRIGLY.REGUL) |
|    | Lipid Regulating | ROSUVASTATIN                                        | C10 (LIP.REG./ANTI-ATH. PREPS) | C10A1 (STATINS (HMG-COA RED))    |



|    |                  |                      |                                |                                  |
|----|------------------|----------------------|--------------------------------|----------------------------------|
|    | Lipid Regulating | SALMON               | C10 (LIP.REG./ANTI-ATH. PREPS) | C10B0 (ANTI-ATHEROMA NATRL ORIG) |
| 1  | Lipid Regulating | SIMVASTATIN          | C10 (LIP.REG./ANTI-ATH. PREPS) | C10A1 (STATINS (HMG-COA RED))    |
| 2  | Lipid Regulating | SOYA LECITHIN        | C10 (LIP.REG./ANTI-ATH. PREPS) | C10B0 (ANTI-ATHEROMA NATRL ORIG) |
| 3  |                  |                      |                                |                                  |
| 4  | <b>CANCER</b>    |                      |                                |                                  |
| 5  | Antineoplastics  | ALEMTUZUMAB          | L1 (ANTINEOPLASTICS)           | L1X3 (ANTINEOPLASTIC MABS)       |
| 6  | Antineoplastics  | ALTRETAMINE          | L1 (ANTINEOPLASTICS)           | L1A0 (ALKYLATING AGENTS)         |
| 7  | Antineoplastics  | ASPARAGINASE         | L1 (ANTINEOPLASTICS)           | L1X9 (ALL OTH. ANTINEOPLASTICS)  |
| 8  | Antineoplastics  | AZACITIDINE          | L1 (ANTINEOPLASTICS)           | L1B0 (ANTIMETABOLITES)           |
| 9  | Antineoplastics  | BEVACIZUMAB          | L1 (ANTINEOPLASTICS)           | L1X3 (ANTINEOPLASTIC MABS)       |
| 10 | Antineoplastics  | BLEOMYCIN            | L1 (ANTINEOPLASTICS)           | L1D0 (ANTINEOPLAS. ANTIBIOTICS)  |
| 11 | Antineoplastics  | BORTEZOMIB           | L1 (ANTINEOPLASTICS)           | L1X9 (ALL OTH. ANTINEOPLASTICS)  |
| 12 | Antineoplastics  | BUSULFAN             | L1 (ANTINEOPLASTICS)           | L1A0 (ALKYLATING AGENTS)         |
| 13 | Antineoplastics  | CAPECITABINE         | L1 (ANTINEOPLASTICS)           | L1B0 (ANTIMETABOLITES)           |
| 14 | Antineoplastics  | CARBOPLATIN          | L1 (ANTINEOPLASTICS)           | L1X2 (PLATINUM COMPOUNDS)        |
| 15 | Antineoplastics  | CARMUSTINE           | L1 (ANTINEOPLASTICS)           | L1A0 (ALKYLATING AGENTS)         |
| 16 | Antineoplastics  | CETUXIMAB            | L1 (ANTINEOPLASTICS)           | L1X3 (ANTINEOPLASTIC MABS)       |
| 17 | Antineoplastics  | CHLORAMBUCIL         | L1 (ANTINEOPLASTICS)           | L1A0 (ALKYLATING AGENTS)         |
| 18 | Antineoplastics  | CHLORMETHINE         | L1 (ANTINEOPLASTICS)           | L1A0 (ALKYLATING AGENTS )        |
| 19 | Antineoplastics  | CISPLATIN            | L1 (ANTINEOPLASTICS)           | L1X2 (PLATINUM COMPOUNDS)        |
| 20 | Antineoplastics  | CLADRIBINE           | L1 (ANTINEOPLASTICS)           | L1B0 (ANTIMETABOLITES)           |
| 21 | Antineoplastics  | CYCLOPHOSPHAMIDE     | L1 (ANTINEOPLASTICS)           | L1A0 (ALKYLATING AGENTS)         |
| 22 | Antineoplastics  | CYTARABINE           | L1 (ANTINEOPLASTICS)           | L1B0 (ANTIMETABOLITES)           |
| 23 | Antineoplastics  | DACARBAZINE          | L1 (ANTINEOPLASTICS)           | L1A0 (ALKYLATING AGENTS)         |
| 24 | Antineoplastics  | DACTINOMYCIN         | L1 (ANTINEOPLASTICS)           | L1D0 (ANTINEOPLAS. ANTIBIOTICS)  |
| 25 | Antineoplastics  | DASATINIB            | L1 (ANTINEOPLASTICS)           | L1X4 (A-NEO PROTEIN KINASE INH)  |
| 26 | Antineoplastics  | DECITABINE           | L1 (ANTINEOPLASTICS)           | L1B0 (ANTIMETABOLITES)           |
| 27 | Antineoplastics  | DOCETAXEL            | L1 (ANTINEOPLASTICS)           | L1C0 (VINCA ALKALOIDS )          |
| 28 | Antineoplastics  | DOXORUBICIN          | L1 (ANTINEOPLASTICS)           | L1D0 (ANTINEOPLAS. ANTIBIOTICS)  |
| 29 | Antineoplastics  | EPIRUBICIN           | L1 (ANTINEOPLASTICS)           | L1D0 (ANTINEOPLAS. ANTIBIOTICS)  |
| 30 | Antineoplastics  | ERLOTINIB            | L1 (ANTINEOPLASTICS)           | L1X4 (A-NEO PROTEIN KINASE INH)  |
| 31 | Antineoplastics  | ETOPOSIDE            | L1 (ANTINEOPLASTICS)           | L1C0 (VINCA ALKALOIDS)           |
| 32 | Antineoplastics  | FLUDARABINE          | L1 (ANTINEOPLASTICS)           | L1B0 (ANTIMETABOLITES)           |
| 33 | Antineoplastics  | FLUOROURACIL         | L1 (ANTINEOPLASTICS)           | L1B0 (ANTIMETABOLITES)           |
| 34 | Antineoplastics  | GEFITINIB            | L1 (ANTINEOPLASTICS)           | L1X4 (A-NEO PROTEIN KINASE INH)  |
| 35 | Antineoplastics  | GEMCITABINE          | L1 (ANTINEOPLASTICS)           | L1B0 (ANTIMETABOLITES)           |
| 36 | Antineoplastics  | HYDROXYCARBAMIDE     | L1 (ANTINEOPLASTICS)           | L1X9 (ALL OTH. ANTINEOPLASTICS)  |
| 37 | Antineoplastics  | IBRITUMOMAB TIUXETAN | L1 (ANTINEOPLASTICS)           | L1X3 (ANTINEOPLASTIC MABS)       |
| 38 | Antineoplastics  | IDARUBICIN           | L1 (ANTINEOPLASTICS)           | L1D0 (ANTINEOPLAS. ANTIBIOTICS)  |
| 39 | Antineoplastics  | IFOSFAMIDE           | L1 (ANTINEOPLASTICS)           | L1A0 (ALKYLATING AGENTS)         |
| 40 | Antineoplastics  | IMATINIB             | L1 (ANTINEOPLASTICS)           | L1X4 (A-NEO PROTEIN KINASE INH)  |
| 41 | Antineoplastics  | IRINOTECAN           | L1 (ANTINEOPLASTICS)           | L1C0 (VINCA ALKALOIDS)           |
| 42 | Antineoplastics  | IXABEPILONE          | L1 (ANTINEOPLASTICS)           | L1X9 (ALL OTH. ANTINEOPLASTICS)  |
| 43 | Antineoplastics  | LAPATINIB            | L1 (ANTINEOPLASTICS)           | L1X4 (A-NEO PROTEIN KINASE INH)  |
| 44 | Antineoplastics  | LOMUSTINE            | L1 (ANTINEOPLASTICS)           | L1A0 (ALKYLATING AGENTS)         |
| 45 | Antineoplastics  | MELPHALAN            | L1 (ANTINEOPLASTICS)           | L1A0 (ALKYLATING AGENTS)         |
| 46 | Antineoplastics  | MERCAPTOPYRINE       | L1 (ANTINEOPLASTICS)           | L1B0 (ANTIMETABOLITES)           |
| 47 | Antineoplastics  | METHOTREXATE         | L1 (ANTINEOPLASTICS)           | L1B0 (ANTIMETABOLITES)           |
|    | Antineoplastics  | MITOMYCIN            | L1 (ANTINEOPLASTICS)           | L1D0 (ANTINEOPLAS. ANTIBIOTICS)  |
|    | Antineoplastics  | MITOXANTRONE         | L1 (ANTINEOPLASTICS)           | L1D0 (ANTINEOPLAS. ANTIBIOTICS)  |

|    |                          |                      |                               |                                 |
|----|--------------------------|----------------------|-------------------------------|---------------------------------|
| 1  | Antineoplastics          | NILOTINIB            | L1 (ANTINEOPLASTICS)          | L1X4 (A-NEO PROTEIN KINASE INH) |
| 2  | Antineoplastics          | OXALIPLATIN          | L1 (ANTINEOPLASTICS)          | L1X2 (PLATINUM COMPOUNDS)       |
| 3  | Antineoplastics          | PACLITAXEL           | L1 (ANTINEOPLASTICS)          | L1C0 (VINCA ALKALOIDS)          |
| 4  | Antineoplastics          | PEMETREXED           | L1 (ANTINEOPLASTICS)          | L1B0 (ANTIMETABOLITES)          |
| 5  | Antineoplastics          | PROCARBAZINE         | L1 (ANTINEOPLASTICS)          | L1X9 (ALL OTH. ANTINEOPLASTICS) |
| 6  | Antineoplastics          | RITUXIMAB            | L1 (ANTINEOPLASTICS)          | L1X3 (ANTINEOPLASTIC MABS)      |
| 7  | Antineoplastics          | SORAFENIB            | L1 (ANTINEOPLASTICS)          | L1X4 (A-NEO PROTEIN KINASE INH) |
| 8  | Antineoplastics          | SUNITINIB            | L1 (ANTINEOPLASTICS)          | L1X4 (A-NEO PROTEIN KINASE INH) |
| 9  | Antineoplastics          | TEGAFUR              | L1 (ANTINEOPLASTICS)          | L1B0 (ANTIMETABOLITES)          |
| 10 | Antineoplastics          | TEGAFUR#URACIL       | L1 (ANTINEOPLASTICS)          | L1B0 (ANTIMETABOLITES)          |
| 11 | Antineoplastics          | TEMOZOLOMIDE         | L1 (ANTINEOPLASTICS)          | L1A0 (ALKYLATING AGENTS)        |
| 12 | Antineoplastics          | TIOGUANINE           | L1 (ANTINEOPLASTICS)          | L1B0 (ANTIMETABOLITES)          |
| 13 | Antineoplastics          | TOPOTECAN            | L1 (ANTINEOPLASTICS)          | L1C0 (VINCA ALKALOIDS)          |
| 14 | Antineoplastics          | TRASTUZUMAB          | L1 (ANTINEOPLASTICS)          | L1X3 (ANTINEOPLASTIC MABS)      |
| 15 | Antineoplastics          | TRETINOIN            | L1 (ANTINEOPLASTICS)          | L1X9 (ALL OTH. ANTINEOPLASTICS) |
| 16 | Antineoplastics          | VINBLASTINE          | L1 (ANTINEOPLASTICS)          | L1C0 (VINCA ALKALOIDS)          |
| 17 | Antineoplastics          | VINCRISTINE          | L1 (ANTINEOPLASTICS)          | L1C0 (VINCA ALKALOIDS)          |
| 18 | Antineoplastics          | VINORELBINE          | L1 (ANTINEOPLASTICS)          | L1C0 (VINCA ALKALOIDS)          |
| 19 | Cytostatic Hormones      | AMINOGLUTETHIMIDE    | L2 (CYTOSTATIC HORMONE THER)  | L2B3 (CYTOSTAT AROMATASE INHIB) |
| 20 | Cytostatic Hormones      | ANASTROZOLE          | L2 (CYTOSTATIC HORMONE THER)  | L2B3 (CYTOSTAT AROMATASE INHIB) |
| 21 | Cytostatic Hormones      | BICALUTAMIDE         | L2 (CYTOSTATIC HORMONE THER)  | L2B2 (CYTO ANTI-ANDROGENS)      |
| 22 | Cytostatic Hormones      | BUSERELIN            | L2 (CYTOSTATIC HORMONE THER)  | L2A3 (CYTO GONAD HORMON ANALOG) |
| 23 | Cytostatic Hormones      | CYPROTERONE          | L2 (CYTOSTATIC HORMONE THER)  | L2B2 (CYTO ANTI-ANDROGENS)      |
| 24 | Cytostatic Hormones      | EXEMESTANE           | L2 (CYTOSTATIC HORMONE THER)  | L2B3 (CYTOSTAT AROMATASE INHIB) |
| 25 | Cytostatic Hormones      | FLUTAMIDE            | L2 (CYTOSTATIC HORMONE THER)  | L2B2 (CYTO ANTI-ANDROGENS)      |
| 26 | Cytostatic Hormones      | FORMESTANE           | L2 (CYTOSTATIC HORMONE THER)  | L2B3 (CYTOSTAT AROMATASE INHIB) |
| 27 | Cytostatic Hormones      | FULVESTRANT          | L2 (CYTOSTATIC HORMONE THER)  | L2B9 (OTH CYTO HORMON ANTAGIST) |
| 28 | Cytostatic Hormones      | GOSERELIN            | L2 (CYTOSTATIC HORMONE THER)  | L2A3 (CYTO GONAD HORMON ANALOG) |
| 29 | Cytostatic Hormones      | LETROZOLE            | L2 (CYTOSTATIC HORMONE THER)  | L2B3 (CYTOSTAT AROMATASE INHIB) |
| 30 | Cytostatic Hormones      | LEUPRORELIN          | L2 (CYTOSTATIC HORMONE THER)  | L2A3 (CYTO GONAD HORMON ANALOG) |
| 31 | Cytostatic Hormones      | MEDROXYPROGESTERONE  | L2 (CYTOSTATIC HORMONE THER)  | L2A2 (CYTOSTATIC PROGESTOGENS ) |
| 32 | Cytostatic Hormones      | MEGESTROL            | L2 (CYTOSTATIC HORMONE THER)  | L2A2 (CYTOSTATIC PROGESTOGENS ) |
| 33 | Cytostatic Hormones      | TAMOXIFEN            | L2 (CYTOSTATIC HORMONE THER)  | L2B1 (CYTO ANTI-OESTROGENS)     |
| 34 | Cytostatic Hormones      | TOREMIFENE           | L2 (CYTOSTATIC HORMONE THER)  | L2B1 (CYTO ANTI-OESTROGENS)     |
| 35 | Cytostatic Hormones      | TRIPTORELIN          | L2 (CYTOSTATIC HORMONE THER)  | L2A3 (CYTO GONAD HORMON ANALOG) |
| 36 | Immunostimulating Agents | FILGRASTIM           | L3 (IMMUNOSTIMULATING AGENTS) | L3A1 (COLONY-STIMULATING FACT.) |
| 37 | Immunostimulating Agents | INTERFERON ALFA      | L3 (IMMUNOSTIMULATING AGENTS) | L3B1 (INTERFERONS ALPHA)        |
| 38 | Immunostimulating Agents | INTERFERON ALFA-2A   | L3 (IMMUNOSTIMULATING AGENTS) | L3B1 (INTERFERONS ALPHA)        |
| 39 | Immunostimulating Agents | INTERFERON ALFA-2B   | L3 (IMMUNOSTIMULATING AGENTS) | L3B1 (INTERFERONS ALPHA)        |
| 40 | Immunostimulating Agents | INTERFERON ALFA-N1   | L3 (IMMUNOSTIMULATING AGENTS) | L3B1 (INTERFERONS ALPHA)        |
| 41 | Immunostimulating Agents | INTERFERON BETA-1A   | L3 (IMMUNOSTIMULATING AGENTS) | L3B2 (INTERFERONS BETA)         |
| 42 | Immunostimulating Agents | INTERFERON BETA-1B   | L3 (IMMUNOSTIMULATING AGENTS) | L3B2 (INTERFERONS BETA)         |
| 43 | Immunostimulating Agents | LENOGRASTIM          | L3 (IMMUNOSTIMULATING AGENTS) | L3A1 (COLONY-STIMULATING FACT.) |
| 44 | Immunostimulating Agents | MOLGRAMOSTIM         | L3 (IMMUNOSTIMULATING AGENTS) | L3A1 (COLONY-STIMULATING FACT.) |
| 45 | Immunostimulating Agents | PEGFILGRASTIM        | L3 (IMMUNOSTIMULATING AGENTS) | L3A1 (COLONY-STIMULATING FACT.) |
| 46 | Immunostimulating Agents | TETRACHLORODECAOXIDE | L3 (IMMUNOSTIMULATING AGENTS) | L3A9 (OTH.IMMUNOSTIM.EX.INTFRN) |
| 47 | Immunostimulating Agents | THYMALFASIN          | L3 (IMMUNOSTIMULATING AGENTS) | L3A9 (OTH.IMMUNOSTIM.EX.INTFRN) |

## STROBE Checklist: Impact of Universal Health Coverage in Thailand on Sales and Market Share of Medicines for Non-Communicable Diseases

STROBE Statement—checklist of items that should be included in reports of observational studies

|                              | Item No | Recommendation                                                                                                                                                                                                                                                                                                                                                                                                                                                                                                                                                                                                                                                                                                                                                                                                                                                                                                                                      |
|------------------------------|---------|-----------------------------------------------------------------------------------------------------------------------------------------------------------------------------------------------------------------------------------------------------------------------------------------------------------------------------------------------------------------------------------------------------------------------------------------------------------------------------------------------------------------------------------------------------------------------------------------------------------------------------------------------------------------------------------------------------------------------------------------------------------------------------------------------------------------------------------------------------------------------------------------------------------------------------------------------------|
| <b>Title and abstract</b>    | 1✓      | (a) Indicate the study's design with a commonly used term in the title or the abstract<br>(b) Provide in the abstract an informative and balanced summary of what was done and what was found                                                                                                                                                                                                                                                                                                                                                                                                                                                                                                                                                                                                                                                                                                                                                       |
| <b>Introduction</b>          |         |                                                                                                                                                                                                                                                                                                                                                                                                                                                                                                                                                                                                                                                                                                                                                                                                                                                                                                                                                     |
| Background/rationale         | 2✓      | Explain the scientific background and rationale for the investigation being reported                                                                                                                                                                                                                                                                                                                                                                                                                                                                                                                                                                                                                                                                                                                                                                                                                                                                |
| Objectives                   | 3✓      | State specific objectives, including any prespecified hypotheses                                                                                                                                                                                                                                                                                                                                                                                                                                                                                                                                                                                                                                                                                                                                                                                                                                                                                    |
| <b>Methods</b>               |         |                                                                                                                                                                                                                                                                                                                                                                                                                                                                                                                                                                                                                                                                                                                                                                                                                                                                                                                                                     |
| Study design                 | 4✓      | Present key elements of study design early in the paper<br><b>NOTE: We use an interrupted time series design, which is a robust longitudinal observational design.</b>                                                                                                                                                                                                                                                                                                                                                                                                                                                                                                                                                                                                                                                                                                                                                                              |
| Setting                      | 5✓      | Describe the setting, locations, and relevant dates, including periods of recruitment, exposure, follow-up, and data collection                                                                                                                                                                                                                                                                                                                                                                                                                                                                                                                                                                                                                                                                                                                                                                                                                     |
| Participants                 | 6 ✓     | (a) <i>Cohort study</i> —Give the eligibility criteria, and the sources and methods of selection of participants. Describe methods of follow-up<br><i>Case-control study</i> —Give the eligibility criteria, and the sources and methods of case ascertainment and control selection. Give the rationale for the choice of cases and controls<br><i>Cross-sectional study</i> —Give the eligibility criteria, and the sources and methods of selection of participants<br>(b) <i>Cohort study</i> —For matched studies, give matching criteria and number of exposed and unexposed<br><i>Case-control study</i> —For matched studies, give matching criteria and the number of controls per case<br><b>NOTE: We explain the data source and methods of selection (i.e., hospital vs. pharmacy sales data – the latter serves as a non-equivalent comparison group) and give the rationale for the choice of therapeutic classes and date range.</b> |
| Variables                    | 7✓      | Clearly define all outcomes, exposures, predictors, potential confounders, and effect modifiers. Give diagnostic criteria, if applicable                                                                                                                                                                                                                                                                                                                                                                                                                                                                                                                                                                                                                                                                                                                                                                                                            |
| Data sources/<br>measurement | 8*✓     | For each variable of interest, give sources of data and details of methods of assessment (measurement). Describe comparability of assessment methods if there is more than one group                                                                                                                                                                                                                                                                                                                                                                                                                                                                                                                                                                                                                                                                                                                                                                |
| Bias                         | 9✓      | Describe any efforts to address potential sources of bias                                                                                                                                                                                                                                                                                                                                                                                                                                                                                                                                                                                                                                                                                                                                                                                                                                                                                           |
| Study size                   | 10✓     | Explain how the study size was arrived at                                                                                                                                                                                                                                                                                                                                                                                                                                                                                                                                                                                                                                                                                                                                                                                                                                                                                                           |
| Quantitative variables       | 11✓     | Explain how quantitative variables were handled in the analyses. If applicable, describe which groupings were chosen and why                                                                                                                                                                                                                                                                                                                                                                                                                                                                                                                                                                                                                                                                                                                                                                                                                        |
| Statistical methods          | 12✓     | (a) Describe all statistical methods, including those used to control for confounding<br>(b) Describe any methods used to examine subgroups and interactions<br>(c) Explain how missing data were addressed<br>(d) <i>Cohort study</i> —If applicable, explain how loss to follow-up was addressed                                                                                                                                                                                                                                                                                                                                                                                                                                                                                                                                                                                                                                                  |

1  
2 *Case-control study*—If applicable, explain how matching of cases and controls was  
3 addressed

4 *Cross-sectional study*—If applicable, describe analytical methods taking account of  
5 sampling strategy  
6

---

7 (e) Describe any sensitivity analyses  
8

9 Continued on next page  
10  
11  
12  
13  
14  
15  
16  
17  
18  
19  
20  
21  
22  
23  
24  
25  
26  
27  
28  
29  
30  
31  
32  
33  
34  
35  
36  
37  
38  
39  
40  
41  
42  
43  
44  
45  
46  
47  
48  
49  
50  
51  
52  
53  
54  
55  
56  
57  
58  
59  
60

For peer review only

1  
2  
3  
4  
5  
6  
7  
8  
9  
10  
11  
12  
13  
14  
15  
16  
17  
18  
19  
20  
21  
22  
23  
24  
25  
26  
27  
28  
29  
30  
31  
32  
33  
34  
35  
36  
37  
38  
39  
40  
41  
42  
43  
44  
45  
46  
47  
48  
49  
50  
51  
52  
53  
54  
55  
56  
57  
58  
59  
60

## Results

|                  |       |                                                                                                                                                                                                                                                                                                                                                                                                                                                       |
|------------------|-------|-------------------------------------------------------------------------------------------------------------------------------------------------------------------------------------------------------------------------------------------------------------------------------------------------------------------------------------------------------------------------------------------------------------------------------------------------------|
| Participants     | 13*NA | (a) Report numbers of individuals at each stage of study—eg numbers potentially eligible, examined for eligibility, confirmed eligible, included in the study, completing follow-up, and analysed<br>(b) Give reasons for non-participation at each stage<br>(c) Consider use of a flow diagram                                                                                                                                                       |
| Descriptive data | 14*✓  | (a) Give characteristics of study participants (eg demographic, clinical, social) and information on exposures and potential confounders<br>(b) Indicate number of participants with missing data for each variable of interest<br>(c) <i>Cohort study</i> —Summarise follow-up time (eg, average and total amount)<br><b>NOTE: We give the characteristics of the therapeutic classes (i.e., number subclasses, medicines within each subclass).</b> |
| Outcome data     | 15*✓  | <i>Cohort study</i> —Report numbers of outcome events or summary measures over time<br><i>Case-control study</i> —Report numbers in each exposure category, or summary measures of exposure<br><i>Cross-sectional study</i> —Report numbers of outcome events or summary measures<br><b>NOTE: We report numbers of outcome events over time.</b>                                                                                                      |
| Main results     | 16✓   | (a) Give unadjusted estimates and, if applicable, confounder-adjusted estimates and their precision (eg, 95% confidence interval). Make clear which confounders were adjusted for and why they were included<br>(b) Report category boundaries when continuous variables were categorized<br>(c) If relevant, consider translating estimates of relative risk into absolute risk for a meaningful time period                                         |
| Other analyses   | 17✓   | Report other analyses done—eg analyses of subgroups and interactions, and sensitivity analyses                                                                                                                                                                                                                                                                                                                                                        |

## Discussion

|                  |     |                                                                                                                                                                            |
|------------------|-----|----------------------------------------------------------------------------------------------------------------------------------------------------------------------------|
| Key results      | 18✓ | Summarise key results with reference to study objectives                                                                                                                   |
| Limitations      | 19✓ | Discuss limitations of the study, taking into account sources of potential bias or imprecision. Discuss both direction and magnitude of any potential bias                 |
| Interpretation   | 20✓ | Give a cautious overall interpretation of results considering objectives, limitations, multiplicity of analyses, results from similar studies, and other relevant evidence |
| Generalisability | 21✓ | Discuss the generalisability (external validity) of the study results                                                                                                      |

## Other information

|         |     |                                                                                                                                                               |
|---------|-----|---------------------------------------------------------------------------------------------------------------------------------------------------------------|
| Funding | 22✓ | Give the source of funding and the role of the funders for the present study and, if applicable, for the original study on which the present article is based |
|---------|-----|---------------------------------------------------------------------------------------------------------------------------------------------------------------|

\*Give information separately for cases and controls in case-control studies and, if applicable, for exposed and unexposed groups in cohort and cross-sectional studies.

**Note:** An Explanation and Elaboration article discusses each checklist item and gives methodological background and published examples of transparent reporting. The STROBE checklist is best used in conjunction with this article (freely available on the Web sites of PLoS Medicine at <http://www.plosmedicine.org/>, Annals of Internal Medicine at <http://www.annals.org/>, and Epidemiology at <http://www.epidem.com/>). Information on the STROBE Initiative is available at [www.strobe-statement.org](http://www.strobe-statement.org).

## TITLE PAGE

**Impact of Universal Health Insurance Coverage in Thailand on Sales and Market Share of Medicines for Non-Communicable Diseases: an Interrupted Time Series Study**

Laura Faden Garabedian, MPH<sup>1</sup>, Dennis Ross-Degnan, ScD<sup>1</sup>, Sauwakon Ratanawijitrasin, PhD<sup>2</sup>, Peter Stephens, MA<sup>3</sup>, Anita Wagner, PharmD, MPH, DrPH<sup>1</sup>

*Institutions:*

<sup>1</sup> Drug Policy Research Group and WHO Collaborating Center in Pharmaceutical Policy Department of Population Medicine, Harvard Medical School and Harvard Pilgrim Health Care Institute  
133 Brookline Ave., Sixth Floor  
Boston, MA, USA

Dennis Ross-Degnan and Anita Wagner are Associate Professors. -Laura Faden Garabedian is a Research Fellow and PhD Candidate.

Corresponding author: Laura Faden Garabedian

Phone: +1 617 509 9921

Email: lfaden@fas.harvard.edu

<sup>2</sup> Professor

Faculty of Social Sciences and Humanities, Mahidol University  
Salaya, Buddhamonthon, Nakhonpathom, 73170 Thailand

<sup>3</sup> Director, Public Health Affairs

IMS Health

7 Harewood Avenue

London, NW1 6JB, UK

**Study Design:** Observational study (interrupted time series design)

**Acknowledgements:** We gratefully acknowledge support of statistical analyses by Dr. Fang Zhang, Department of Population Medicine, Harvard Medical School and Harvard Pilgrim Health Care Institute, Boston, USA. Dr. Sanita Hirunrassamee, Phramongkutklo Hospital, Bangkok, Thailand, and Ms. Rosarin Sruamsiri and Dr. Nathorn Chaiyakunapruk, Naresuan University, Phitsanulok, Thailand, provided helpful input on Thai essential medicines listings and coverage policies. Mr. Amit Backliwal, at the time of the study at IMS Health, Bangkok, Thailand, shared valuable insights on the Thai pharmaceutical market.

**Author contributions:-** Laura Garabedian, Dennis Ross-Degnan and Anita Wagner designed the study and developed the analytic approach. Peter Stephens assembled the data files. Laura Garabedian analyzed the data. Sauwakon Ratanawijitrasin provided the Thai national list of essential medicines and information on relevant Thai policies and context surrounding the

Formatted

Formatted: Font: Bold

1  
2  
3  
4  
5  
6  
7  
8  
9  
10  
11  
12  
13  
14  
15  
16  
17  
18  
19  
20  
21  
22  
23  
24  
25  
26  
27  
28  
29  
30  
31  
32  
33  
34  
35  
36  
37  
38  
39  
40  
41  
42  
43  
44  
45  
46  
47  
48  
49  
50  
51  
52  
53  
54  
55  
56  
57  
58  
59  
60

1 | reform. All authors participated in the interpretation of the results. -Laura Garabedian wrote the  
2 | first draft of the paper. All authors contributed to the writing of the manuscript.

3  
4 | Opinions expressed are solely those of the authors and not of the institutions they represent.

5  
6 | **Competing Interest Statement:** All authors have completed the Unified Competing Interest  
7 | form at [www.icmje.org/coi\\_disclosure.pdf](http://www.icmje.org/coi_disclosure.pdf) (available on request from the corresponding author)  
8 | and declare: LFG had financial support from Harvard Medical School and Harvard University,  
9 | AW and DRD were supported in part by a grant from the Novartis Foundation for Sustainable  
10 | Development, PS is an employee of IMS Health; no financial relationships with any  
11 | organisations that might have an interest in the submitted work in the previous 3 years; no other  
12 | relationships or activities that could appear to have influenced the submitted work.

13 | **Funding:** IMS Health provided the data in-kind. The Harvard Medical School Fellowship in  
14 | Pharmaceutical Policy Research and the Harvard University PhD Program in Health Policy  
15 | supported Ms. Garabedian. Drs. Wagner and Ross-Degnan were supported in part by a grant  
16 | from the Novartis Foundation for Sustainable Development to develop examples of research on  
17 | access to medicines using IMS Health data for presentation at the Third International Conference  
18 | for Improving Use of Medicines.

19  
20 | **IRB Approval:** Harvard Pilgrim Health Care Institute Office of Sponsored Programs

21  
22 | **Exclusive Licence Statement:** The Corresponding Author has the right to grant on behalf of all  
23 | authors and does grant on behalf of all authors, [a worldwide licence](#) to the Publishers and its  
24 | licensees in perpetuity, in all forms, formats and media (whether known now or created in the  
25 | future), to i) publish, reproduce, distribute, display and store the Contribution, ii) translate the  
26 | Contribution into other languages, create adaptations, reprints, include within collections and  
27 | create summaries, extracts and/or, abstracts of the Contribution, iii) create any other derivative  
28 | work(s) based on the Contribution, iv) to exploit all subsidiary rights in the Contribution, v) the  
29 | inclusion of electronic links from the Contribution to third party material where-ever it may be  
30 | located; and, vi) licence any third party to do any or all of the above.

31  
32 | **Data Sharing Statement:** Data available upon request, at the approval of IMS Institute for  
33 | Healthcare Informatics.

Formatted: Font: Bold

## Article Summary

### Article Focus

- Medicines present a key challenge to achieving universal coverage.
- Health insurance systems have the potential to improve cost-effective use of medicines, yet there is little evidence about their impact on medicine use in low- and middle-income countries.
- The recent rapid implementation of universal health coverage in Thailand presents a unique opportunity to measure the impact of health insurance expansion and associated physician capitated payment changes on utilization of medicines.

### Key Messages

- Expanding health insurance coverage with a medicines benefit to the entire Thai population increased access to medicines in primary care.
- The universal coverage scheme did not seem to have increased use of medicines for diseases that are typically treated in secondary or tertiary care settings, or increased generic market penetration.
- In the future, it will be important for countries to assess quality and equity of medicines use as they pursue policies to achieve universal coverage.

### Strengths and Limitations

- We used an interrupted time series design, the strongest quasi-experimental approach for evaluating effects of interventions, increasing internal validity.
- It is impossible to examine population subgroups in national IMS Health market data, but we are reasonably confident that universal coverage scheme enrollees are responsible for observed changes.





1  
2  
3  
4  
5  
6  
7  
8  
9 **1 MANUSCRIPT**

10  
11 **2 Introduction**

12  
13  
14 **4 *Universal Health Coverage***

15 In 2005, Member States of the World Health Organization (WHO) made a commitment to work  
16 towards universal health care coverage.<sup>1</sup> The 2010 WHO World Health Report provides a  
17 roadmap for countries to achieve this goal.<sup>2</sup> Universal coverage requires the restructuring of  
18 health care and financing systems to improve access to health care services, reduce financial  
19 hardship, and increase the efficiency and equity of the health system.<sup>2</sup>

20 Medicines, which consume 25–65% of total public and private spending on health in  
21 developing countries,<sup>3</sup> present a key challenge to achieving universal coverage. The high  
22 spending on, and inefficient use of, medicines threaten the financial sustainability of a universal  
23 coverage scheme. According to the WHO, three of the top ten sources of health care inefficiency  
24 involve medicines: high medicine prices and underuse of generics; use of substandard and  
25 counterfeit medicines; and inappropriate and ineffective use of medicines.<sup>2</sup> Health insurance  
26 systems have several features (e.g., a defined population, access to utilization data, and financial  
27 leverage) that give them a unique advantage to reduce out-of-pocket (OOP) expenditures and  
28 improve the cost-effective use of medicines through active management strategies involving  
29 medicines selection, purchasing, contracting (e.g., physician payment) and utilization  
30 management.<sup>4</sup> However, there is little evidence about the impact of health insurance on access to  
31 and use of medicines in low- and middle-income countries (LMICs).<sup>4</sup>

32  
33  
34  
35  
36  
37  
38  
39  
40  
41  
42  
43  
44  
45  
46  
47  
48  
49  
50  
51  
52  
53  
54  
55  
56  
57  
58  
59  
60

The recent implementation of universal health coverage in Thailand presents a unique  
opportunity to measure the impact of health insurance expansion and physician hospital payment  
changes (from fee-for-service to capitation the majority of the population is now covered under a  
closed-ended payment scheme<sup>5</sup>) on utilization of medicines.

**49 *Universal Health Coverage in Thailand***

30 With the implementation of the UCS in 2001, Thailand became one of the first LMICs to achieve  
31 universal coverage.<sup>5,6,7</sup> The reforms reform preserved the formal sector workforce schemes: the

Formatted: Superscript

1  
2  
3  
4  
5  
6  
7  
8  
9  
10  
11  
12  
13  
14  
15  
16  
17  
18  
19  
20  
21  
22  
23  
24  
25  
26  
27  
28  
29  
30  
31  
32  
33  
34  
35  
36  
37  
38  
39  
40  
41  
42  
43  
44  
45  
46  
47  
48  
49  
50  
51  
52  
53  
54  
55  
56  
57  
58  
59  
60

Social Health Insurance (SHI) scheme for private sector employees (~~6.37.2%~~ of the total population in 2001) and the Civil Service Medical Benefit Scheme (CSMBS) for government employees and their dependents (~~13.6%~~).<sup>7</sup> ~~In addition, the~~ 8.5%.<sup>8</sup> The UCS covered those previously enrolled in a voluntary health card (VHC) scheme (~~22.020.8%~~), in private health insurance (~~2.1.6%~~), or in a tax-based, means-tested Low Income Scheme (LIS) for the poor, elderly, children and disabled (~~28.32.4%~~).<sup>8,9%</sup><sup>7,8</sup> as well as more than one quarter (~~26.629.0%~~) of the population without previous insurance.<sup>7,8</sup> The UCS was rolled out to all provinces between April and October 2001.<sup>56</sup> By ~~20052004~~, 95.5% of the population was insured, with ~~just over 70%~~ three-quarters (75.2%) of the population covered by the UCS.<sup>76</sup>

Formatted: Superscript

In addition to coverage expansion, the reform also dramatically altered the mechanism for hospital payment. Before the reform, hospitals were accustomed to fee-for-service (FFS) payments from most insurance schemes, aside from SSI, and the uninsured, who paid OOP per service (i.e., user fees).<sup>10</sup> The majority of user fee spending was on medicines.<sup>11</sup> After the reform, FFS payment only applied to CSMBS patients and for the majority of patients, now UCS enrollees, hospitals were paid on a closed-ended basis<sup>5</sup> for all covered services, including medicines.

The UCS is a compulsory, tax-financed scheme with comprehensive coverage of inpatient and outpatient services, including medicines on the National List of Essential Medicines (NLEM).<sup>56</sup> Individuals must enroll in the scheme at a local Contracting Unit for Primary Care (CUP),<sup>56</sup> primarily housed in government-owned hospitals.<sup>9,12</sup> Each CUP receives a capitated payment per registered member to provide outpatient services and medicines.<sup>56</sup> CUPs initially served as gatekeepers for secondary and tertiary hospitals. ~~When~~ At the beginning of the scheme, when patients were referred, diagnosis-related payments (DRG) for higher-level care ~~initially came had to come~~ out of the CUP's capitated payment, so CUPs had a financial disincentive to refer patients.<sup>56</sup> Shortly after the reform was implemented, a separate fund (i.e., a global budget) for inpatient services was created, which likely reduced disincentives to refer created by the capitated payment scheme.<sup>6</sup> A capitated payment also creates financial incentives for use of lower cost medicines (e.g., generics or less expensive therapeutic alternatives).

Formatted: Superscript

Formatted: Superscript

Formatted: Superscript

Formatted: Font color: Red

1  
2  
3  
4  
5  
6  
7  
8  
9 1 Our objective was to evaluate the immediate, short-term (one year) and long-term (five year)  
10 2 impacts of the UCS on pharmaceutical market size and composition for medicines for three non-  
11 3 communicable diseases (NCDs): cancer, cardiovascular disease, and diabetes. We hypothesized  
12 4 that the UCS would result in a gradual increase in sales volume, particularly of products used in  
13 5 primary care, as enrollment into the ~~Schemescheme~~ increased, and ~~unlikely made access to health~~  
14 6 ~~services and medicines more affordable for the majority of the population. We also hypothesized~~  
15 7 ~~that there would be~~ an immediate ~~increaseshift~~ in market share ~~offrom more expensive brand~~  
16 8 ~~name to~~ less expensive generic or branded generic products and ~~to~~ medicines on the NLEM in  
17 9 response to ~~capitated-paymentclosed-ended budget~~ rules. We focused on medicines for NCDs  
18 10 since these illnesses represent a large and growing health care burden in ~~Thailand<sup>10-13</sup>Thailand<sup>13-</sup>~~  
19 11 ~~16~~ and other ~~LMICs<sup>14</sup>LMICs<sup>17</sup>~~ and most, but not all, medicines for NCDs would be prescribed  
20 12 and dispensed in primary care settings.

## 13 **Methods**

### 14 **Data**

15 We used data on quarterly pharmaceutical sales in Thailand from 1998 to 2006 provided by IMS  
16 16 Health.<sup>15,18</sup> The sales data are generated from reports to IMS Health by multinational  
17 17 pharmaceutical companies and surveys of purchases by hospital and retail pharmacies.- IMS  
18 18 surveys approximately 200 hospitals (including general and specialized, public and private) and  
19 19 350 retail pharmacies in Thailand, ~~and employs. These facilities constitute~~ a stratified random  
20 20 sample of ~~these facilities that enables~~ the over 1,100 hospitals and 14,000 retail pharmacies in  
21 21 ~~Thailand to enable~~ national projections. ~~Documentation on the IMS data collection and~~  
22 22 ~~validation process is available upon request from the authors.~~ Medicines were classified  
23 23 according to the European Pharmaceutical Research Association (EphMRA) Anatomical  
24 24 Therapeutic Chemical (ATC) system.<sup>16-19</sup>

### 26 **Outcomes**

27 We used two outcome measures: total volume and percent market share. *Total volume* is the  
28 28 number of standard units purchased per capita per quarter (i.e., “sales”). We analyzed total  
29 29 volume by sector (i.e., retail versus hospital) ~~and, within the hospital sector, by NLEM versus~~  
30 30 ~~non-NLEM status of medicines (based on the 1999 Thai NLEM).~~ A standard unit, as defined by  
31 31 IMS Health, is the smallest dose of a product, which equates to one tablet or capsule for an oral

1  
2  
3  
4  
5  
6  
7  
8  
9  
10  
11  
12  
13  
14  
15  
16  
17  
18  
19  
20  
21  
22  
23  
24  
25  
26  
27  
28  
29  
30  
31  
32  
33  
34  
35  
36  
37  
38  
39  
40  
41  
42  
43  
44  
45  
46  
47  
48  
49  
50  
51  
52  
53  
54  
55  
56  
57  
58  
59  
60

dosage form, one teaspoon (5ml) for a syrup, and one ampoule or vial for an injectable product.

WeFor the total volume analyses, we divided total volume by size of the population over 15 years old to control for population growth (using yearly population estimates from the World Bank<sup>17</sup>Bank<sup>20</sup>). We used the entire population as denominator for insulins, since they are also used for Type 1 diabetes, a chronic disease that affects children. Percent market share is the percent of total volume in four mutually exclusive categories of licensing status: originator brand products, branded generic products (products sold under a brand name other than the originator brand name of the molecule), generic products (products that are sold under the generic molecule name), and products manufactured by Thailand's Government Pharmaceutical Organization (GPO). We also assessed percent market share by NLEM status (based on the 1999 and 2004 Thai NLEM).

Formatted: Font: 12 pt

We analyzed total volume and market share for medicines in eight therapeutic classes: two classes of diabetes products (oral antidiabetics and insulins), three classes of cardiovascular disease products (antihypertensives, lipid-regulating, and cardiac therapy products) and three classes of cancer products (antineoplastics, immunostimulating agents, and cytostatic hormone therapy products); Table 1 in the online appendix lists all medicines by ATC code. We assigned each therapeutic class to one of two categories: medicines usually used to treat primary care health conditions and medicines usually used to treat more complicated conditions, typically in secondary/tertiary, often inpatient care, settings. Antidiabetic, insulin, antihypertensive and lipid-lowering products are usually used for ~~conditions that are typically treated in~~ primary care ~~settings~~ conditions (i.e., diabetes, high blood pressure and high cholesterol), whereas cardiac therapy and cancer products are usually used for more severe conditions that ~~are~~ more likely ~~to be treated~~ require treatment by a specialist and/or in an inpatient ~~settings~~ setting.

### **Research Design**

We used an interrupted time series design, the strongest quasi-experimental approach for evaluating effects of interventions, which has been used extensively for medication use research.<sup>1821</sup> Although we did not have an equivalent control group, we used medicines sold in the retail sector as a non-equivalent comparison group,<sup>1922</sup> assuming that the retail market should

1  
2  
3  
4  
5  
6  
7  
8  
9 be relatively unaffected by the reforms since UCS enrollees could only obtain covered medicines  
10 through their local, hospital-based CUP.  
11

### 12 13 *Statistical Analysis*

14 The intervention was the UCS roll-out from April to October 2001. We defined three distinct  
15 periods: 12 quarters pre-reform (1998Q2-2001Q1), a 3-quarter UCS roll-out period (2001Q2-  
16 2001Q4; grey box in figures), and 19 quarters post-reform (2002Q1-2006Q3). We ~~dropped~~  
17 ~~2006Q4 from the~~ended analysis prior to 2006Q4 since there was a policy change at ~~this~~that time  
18 (the removal of an initial 30 Baht co-payment per visit) ~~that~~which may have impacted outcomes.  
19 In sensitivity analyses, we extended the intervention roll-out period through 2002 and through  
20 2003 to account for potentially delayed implementation and lag of actual enrollment into the  
21 scheme.  
22  
23  
24  
25  
26

27 We used segmented linear regression to measure the pre-reform trend, the immediate level  
28 change following the intervention period, and the post-reform change in trend (as compared to  
29 the pre-reform trend). ~~For the NLEM analysis, we reclassified NLEM status in 2005Q1 (when~~  
30 ~~the 2004 list was implemented) and included a pre-post term ("NLEM") in the model to account~~  
31 ~~for possible discontinuity due to the reclassification. We report two estimates from the~~  
32 ~~segmented regression models – the post-reform change in trend and the immediate level change~~  
33 ~~following the reform.~~ We controlled for serial autocorrelation using an autoregressive error  
34 model. We retained all terms in the models, even if non-significant. We used the models to  
35 estimate absolute and relative differences (with 95% confidence intervals)<sup>2023</sup> in observed versus  
36 predicted total volume at one year and five years post-reform. In sensitivity analyses, we  
37 included a quadratic term for the post-reform trend and used a likelihood ratio test to determine  
38 the best-fitting model. ~~We report below results from the best-fitting model of the shortest (i.e., 3~~  
39 ~~quarter) intervention period and mention differences in model results where they existed. Results~~  
40 ~~from sensitivity analyses are available upon request. We used the AUTOREG procedure in SAS~~  
41 ~~9.23~~ for all analyses. ~~▲~~  
42  
43  
44  
45  
46  
47  
48  
49

### 50 51 **Results**

52  
53  
54  
55  
56  
57  
58  
59  
60

Formatted: Font: Not Bold, Not Italic, (Asian) Chinese (PRC)

Formatted: Add space between paragraphs of the same style, No widow/orphan control, Don't adjust space between Latin and Asian text, Don't adjust space between Asian text and numbers

Formatted: Font: Bold

Formatted: Font color: Red

Formatted: Font color: Auto

1  
2  
3  
4  
5  
6  
7  
8  
9  
10  
11  
12  
13  
14  
15  
16  
17  
18  
19  
20  
21  
22  
23  
24  
25  
26  
27  
28  
29  
30  
31  
32  
33  
34  
35  
36  
37  
38  
39  
40  
41  
42  
43  
44  
45  
46  
47  
48  
49  
50  
51  
52  
53  
54  
55  
56  
57  
58  
59  
60

### *Hospital Sector Volume*

The majority of sales in Thailand for all cancer, cardiovascular disease and diabetes medicines studied were in the hospital sector and were for medicines on the NLEM. After implementation of the UCS, there was a significant increase in *level* of sales of insulins and a significant increase in *trend* in sales of antidiabetic, insulin, antihypertensive, lipid regulating, and cytostatic hormone products [Table 1, Figures 1 and 2]. There was a significant reduction in *level* of sales immediately following the reforms for three medication classes: antihypertensive, cardiac therapy and immunostimulating agents (although only the latter was significant in the sensitivity analyses using a longer intervention period) [\[Table 1, Figures 1 and 2\]](#).

The UCS was associated with increased sales of diabetes medicines. One year after the policy, the sale of insulin was 35% (95% CI: 15%, 55%) higher and, at five years, 174% (95% CI: 114%-235%) higher than what would have been expected in the absence of the UCS [Table 2]. The increase in insulin sales was driven primarily by human insulins, which are on the NLEM and marketed as branded generics by two manufacturers. The policy was associated with a 39% (95% CI: 14%, 64%) increase in antidiabetic product sales five years after implementation [Table 2]. This ~~is~~was largely due to increased sales of generic and branded generic metformin and glibenclamide products, both of which are on the NLEM.

Implementation of the UCS appears to have had a mixed impact on sales of cardiovascular medicines. Five years after the policy, the sale of lipid lowering agents was nearly double (108% increase; 95% CI: 60%, 157%) what would have been expected in the absence of the scheme [Table 2]. The increase was primarily due to sales of branded generic simvastatin and gemfibrozil products, which are on the NLEM, and a small but steady increase in sales of originator atorvastatin products, which ~~are~~were not on the NLEM [until 2004](#). For antihypertensives, the significant increase in post-policy trend compensated for an initial drop in sales, resulting in a slight increase in sales five years after the policy (19% increase; 95% CI: -3%, 40%). The increased trend was primarily due to sales of enalapril, atenolol, and amlodipine, all of which are on the NLEM and predominately sold as branded generics. The reform had no significant impact on sales of cardiac therapy medicines one or five years after the policy.

Formatted: Font color: Auto

Formatted: Font: Italic

Formatted: Font: Italic

Formatted: Font: Italic

1  
2  
3  
4  
5  
6  
7  
8  
9 1 The results were also mixed for cancer medicines. The UCS had no significant one- or five-year  
10 2 impact on the sale of antineoplastics or cytostatic hormones (although the latter class did  
11 3 experience a significant post-policy increase in trend). However, the policy was associated with  
12 4 an immediate reduction in sales of immunostimulating agents that did not recover in the post-  
13 5 policy period. One year after implementation, the sale of immunostimulating agents was 35%  
14 6 (95% CI: -45%, -25%) lower than expected from pre-policy trends, and 26% lower (95% CI: -  
15 7 45%, -8%) five years post-policy. This drop is almost entirely due to a sharp reduction in sales of  
16 8 interferon alfa-2b, a non-NLEM medicine, around the time of UCS implementation, which could  
17 9 have been due to a ~~co-incident~~coincidental recall of an interferon alfa-2b product.<sup>21, 24</sup>

10  
11 ~~There was mixed evidence about the effects of the UCS on utilization of NLEM medicines. For~~  
12 ~~all classes that experienced a post-policy increase in trend, there was an increase in sales of both~~  
13 ~~NLEM medicines (except for cytostatic hormones) and non-NLEM products [see online~~  
14 ~~appendix, Table 3]. The immediate decrease in sales of cardiac therapies and immunostimulating~~  
15 ~~agents was largely due to a decrease in non-NLEM medicines. However, for these two classes,~~  
16 ~~there was no corresponding increase in NLEM medicines.~~

17  
18 Finally, as expected, the reform had little impact on sales volume in the retail sector – there were  
19 few significant post-implementation changes, and the changes that were significant were small in  
20 magnitude [see online appendix, Table 2].

### 22 **Hospital Sector Market Share**

23 Immediately following the reform, there were significant shifts in hospital sector market share by  
24 licensing status for most classes [Table 3]. The changes for antidiabetics and cardiac medicines –  
25 the two therapeutic classes with the largest shifts – were due to significant increases in GPO-  
26 produced medicines, primarily at the expense of branded generics and, to a lesser extent,  
27 generics. There was a significant increase in GPO antidiabetic products (+16% of market; 95%  
28 CI: 12%, 20%), and decreases in branded generic (-12%; 95% CI: -16%, -9%) and generic (-4%;  
29 95% CI: -6%, -1%) products immediately after the policy [Figure 3]. Similarly, there was a  
30 significant increase in GPO cardiac therapy products (+22%; 95% CI: 15%, 28%), and  
31 significant decreases of branded generic (-14%; 95% CI: -21%, -7%) and generic (-4%; 95% CI: -



1  
2  
3  
4  
5  
6  
7  
8  
9  
10  
11  
12  
13  
14  
15  
16  
17  
18  
19  
20  
21  
22  
23  
24  
25  
26  
27  
28  
29  
30  
31  
32  
33  
34  
35  
36  
37  
38  
39  
40  
41  
42  
43  
44  
45  
46  
47  
48  
49  
50  
51  
52  
53  
54  
55  
56  
57  
58  
59  
60

6%, -2%) products immediately after the policy [Figure 4]. There was also a small decrease in market share of generic antihypertensives (-6%; 95% CI: -8%, -3%), which was compensated for by a marginally significant increase in GPO products.

The market for lipid regulating agents experienced an immediate shift from originator products (-8% market share; 95% CI: -10%, -5%) to branded generics (+8%; 95% CI: 5%, 10%). A similar shift was seen for in the market for immunostimulating agents (6% decrease in originator products [95% CI: -10%, -3%] and a 5% increase in branded generics [95% CI: 2%, 7%]). The cytostatic hormone market experienced an immediate shift from branded generic (-8%; 95% CI: -12%, -4%) to generic products (+6%, 95% CI: 1%, 11%). Generic insulins experienced a slight decrease in market share caused by the market exit of the sole generic manufacturer just prior to the policy. There were no immediate changes in market share for antineoplastics. Aside from the immediate level changes following the policy, there were few major changes in market share for all classes.

The UCS did not have a major impact on NLEM market share, likely because the share of NLEM medicines was already quite high [see online appendix Table 6 and Figure 17]. The only notable level change, for immunostimulating agents, was likely due to the coincidental recall of a non-NLEM interferon alfa-2b product.<sup>24</sup> While all medicine classes had significant post-reform trends, these trends were small in magnitude and NLEM market share remained fairly stable over the study period until the 2004 NLEM was introduced. There were large changes in NLEM market share for three classes – antihypertensives, lipid regulating agents and cytostatic hormones – at the time of the 2004 NLEM implementation in 2005Q1 [see online appendix Table 6 and Figure 17]. Given the increase in post-reform volume for many medicine classes, a stable NLEM market share in the short-term (i.e., pre-2005) following the UCS implementation suggests a post-reform increase in both NLEM and non-NLEM medicines.

## Discussion

The UCS was associated with long-term (i.e., 5 year) increases in hospital sector sales of medicines for chronic diseases that are usually treated in primary care settings, such as diabetes, high blood pressure, and high cholesterol. We hypothesized this gradual increase in ~~volume~~ volumes since the UCS expanded access to primary ~~care~~ care<sup>25</sup> and actual enrollment into

Formatted: Font color: Auto

1  
2  
3  
4  
5  
6  
7  
8  
9 1 the scheme occurred gradually from implementation in 2001 until around ~~2005~~2004, by which  
10 2 time 95.5% of the population had insurance coverage.<sup>76</sup> The UCS, which radically changed  
11 3 hospital financing and reimbursement, was also associated with an immediate market shift to  
12 4 locally produced or branded generic products for most therapeutic classes.  
13  
14  
15

16 6 Despite these increases in access, the policy did not appear to increase sales of medicines for  
17 7 more severe diseases like heart failure, arrhythmias, and cancer, which are often treated in  
18 8 secondary or tertiary settings. This finding is ~~in-line~~consistent with evidence that the capitated  
19 9 payment system initially discouraged referrals of UCS patients to higher-level care.<sup>5,7,22,6,25,26</sup> The  
20 10 UCS also appears to have had a mixed impact on utilization of essential medicines. There were  
21 11 increases in NLEM medicines, which are covered, as well as non-NLEM medicines. Similarly,  
22 12 given the capitated UCS payment system, we expected to see an increase in sales of generic  
23 13 medicines, which are typically less expensive. However, the majority of sales in most classes  
24 14 were for branded generic products, many of which had generic alternatives in the market.  
25 15 Interestingly, substantial market share shifts occurred toward products manufactured by the Thai  
26 16 GPO, which ~~by law received preferential status by hospital purchasers.~~<sup>23</sup> ~~GPO products have~~  
27 17 ~~been noted to have higher than market prices<sup>24</sup> and sometimes to be of substandard quality.~~<sup>25</sup> have  
28 18 been noted to have higher than market prices.<sup>27</sup> By law, GPO products received preferential  
29 19 status by hospital purchasers,<sup>28</sup> which negates the incentive to prescribe cheaper alternatives  
30 20 under the capitated payment system. While the increase in GPO products and the UCS  
31 21 implementation may be a coincidence in timing, it is noteworthy that the GPO expanded its  
32 22 product line at a time when the UCS policy expanded the market of people who could afford  
33 23 medicines.  
34  
35  
36  
37  
38  
39  
40  
41  
42

43 25 Our study demonstrates the value of IMS Health market intelligence data for rigorous health  
44 26 policy evaluation. Unlike other sources of data on pharmaceutical utilization (i.e., national health  
45 27 surveys or ad hoc hospital surveys), IMS data represent country pharmaceutical markets  
46 28 consistently over time and are useful for the evaluation of system-wide interventions.  
47 29 Nevertheless, the data pose some limitations. Aggregate national sales data do not allow us to  
48 30 determine whether observed increases in medicines sales occurred preferentially among UCS  
49 31 enrollees or enrollees in the SHI and CSMBS schemes, conceivably to compensate for financial  
50  
51  
52  
53  
54  
55  
56  
57  
58  
59  
60

1  
2  
3  
4  
5  
6  
7  
8  
9  
10  
11  
12  
13  
14  
15  
16  
17  
18  
19  
20  
21  
22  
23  
24  
25  
26  
27  
28  
29  
30  
31  
32  
33  
34  
35  
36  
37  
38  
39  
40  
41  
42  
43  
44  
45  
46  
47  
48  
49  
50  
51  
52  
53  
54  
55  
56  
57  
58  
59  
60

strain of the UCS on hospital budgets.<sup>56</sup> CSMBS expenditures increased following UCS implementation<sup>26</sup> implementation<sup>29</sup> and increased medicines sales among CSMBS enrollees, reimbursed on a fee-for-service basis, could explain increases in non-NLEM medicines and medicines with less expensive therapeutic alternatives.<sup>27,5</sup> However, it is unlikely that increased utilization among CSMBS enrollees explains most of the observed volume changes since ~~it would imply that one-quarter (for diabetes) to one-third (for hypertension) of CSMBS members were on these treatments and the change in utilization would have needed to be coincident with the initiation of the UCS; this would imply that one-half (for diabetes) to three-quarters (for hypertension) of CSMBS members (7.1% of the total population in 2004<sup>6</sup>) were on these treatments in 2004. Even the CSMBS and SSI schemes combined (20.3% of the total population in 2004<sup>6</sup>) are unlikely to be responsible for the observed changes since this would imply that one-quarter (for diabetes) and one-third (for hypertension) of enrollees in the two schemes were on these treatments in 2004. These estimates are much higher than the national prevalence (6.7% for diabetes<sup>30</sup> and 22.0% for hypertension<sup>31</sup> in 2004) and unlikely in the civil servant and private sector workforce populations, which are likely to be healthier and wealthier than the national average.~~

Our interpretation of the observed changes assumes that pharmaceutical sales to hospital and retail pharmacies reflected total market utilization, and that hospital sales volumes included utilization at affiliated primary care units. This assumption seems justified in light of the estimated 91% accuracy of IMS Health data in representing the Thai pharmaceutical market.<sup>28,32</sup> For local generic products, including those produced by the GPO, IMS Health data ~~is~~are based on pharmacy surveys only (as opposed to pharmacy surveys and manufacturer reports), so we may have underestimated utilization. ~~However, unless this systematic underestimation changed at the point of the UCS implementation, it would not have impacted our results.~~ Finally, since we did not convert standard units of product sold to defined daily doses (DDD), we do not describe sales changes in terms of average adult doses.

There are also potential limitations due to study design and statistical analysis. We addressed the main threat to the internal validity of the interrupted time series design — a concurrent event that affects the outcome of interest — by assessing other policies or market events that occurred at the

1  
2  
3  
4  
5  
6  
7  
8  
9 1 time of the UCS, through literature reviews, discussions with in-country experts, and by  
10 2 including the retail sector as a comparison. The statistical approach, segmented regression  
11 3 analysis, usually assumes a linear trend and well-defined break point. Sensitivity analyses that  
12 4 varied model specification and intervention duration did not change the findings. -By reporting  
13 5 results from fully-specified models, we may have underestimated the statistical significance of  
14 6 one- and five-year change estimates.  
15  
16  
17  
18

19 8 While both the context and the implementation of universal coverage in Thailand are unique and  
20 9 not necessarily generalizable to other LMICs, our findings suggest that expanding health  
21 10 insurance coverage with a medicines benefit to the entire population, together with changes in a  
22 11 LMIC the payment system and increased the local manufacturing, increased the per capita volume  
23 12 of medicines sold and, by inference, improved access to medicines in the primary care sector in  
24 13 Thailand, presumably by making medicines more affordable. Since the study period, Thailand  
25 14 has enacted further policies to address pharmaceutical sector cost escalation (e.g., strict  
26 15 enforcement of reimbursement for only NLEM medicines in the CSMBS<sup>29</sup> CSMBS<sup>33</sup>) and to  
27 16 ensure appropriate access to non-NLEM medicines (e.g., coverage of medicines for HIV, renal  
28 17 replacement therapy, and mental health conditions). <sup>30-32,34-36</sup> In the future, it will be important for  
29 18 Thailand and other countries to assess equity in access to and quality of use of medicines use,  
30 19 availability of medicines in health centers and hospitals, out-of-pocket and system expenditures  
31 20 and affordability, and health outcomes as they pursue policies to achieve universal coverage.  
32  
33  
34  
35  
36  
37  
38  
39  
40  
41  
42  
43  
44  
45  
46  
47  
48  
49  
50  
51  
52  
53  
54  
55  
56  
57  
58  
59  
60

1  
2  
3  
4  
5  
6  
7  
8  
9  
10  
11  
12  
13  
14  
15  
16  
17  
18  
19  
20  
21  
22  
23  
24  
25  
26  
27  
28  
29  
30  
31  
32  
33  
34  
35  
36  
37  
38  
39  
40  
41  
42  
43  
44  
45  
46  
47  
48  
49  
50  
51  
52  
53  
54  
55  
56  
57  
58  
59  
601  
2  
3  
4  
5  
6  
7  
8  
9  
10  
11  
12  
13  
14  
15  
16  
17  
18  
19  
20  
21  
22  
23  
24  
25  
26  
27  
28  
29  
30  
31  
32  
33  
34  
35  
36  
37  
38  
39  
40  
41  
42  
43  
44  
45  
46  
47  
48  
49  
50  
51  
52  
53  
54  
55  
56  
57  
58  
59  
60**References**

- 1 World Health Organization. Resolution from the fifty-eight World Health Assembly. Sustainable health financing, universal coverage and social health insurance (WHA58.33) [Internet]. 2005 [cited 2011 Mar 8]. Available from: [http://www.who.int/providingforhealth/topics/WHA58\\_33-en.pdf](http://www.who.int/providingforhealth/topics/WHA58_33-en.pdf).
- 2 World Health Organization. 2010 World Health Report: Health systems financing: the path to universal coverage [Internet]. 2010 [cited 2011 Mar 8]. Available from: <http://www.who.int/whr/2010/en/index.html>.
- 3 J. Quick. Ensuring access to essential medicines in developing countries—A framework for action. *Clinical Pharmacology and Therapeutics*. 2003;73(4): 279–283.
- 4 Faden L, Vialle-Valentin C, Ross-Degnan D, Wagner A. Active pharmaceutical management strategies of health insurance systems to improve cost-effective use of medicines in low- and middle-income countries: a systematic review of current evidence. *Health Policy*. 2011;100(2-3):134-143.

**Formatted: Font: Bold****Formatted: Default Paragraph Font, Font: Not Bold****Formatted: Normal****Formatted: Normal, Line spacing: 1.5 lines****Formatted: Font: Bold****Formatted: Space After: 0 pt, Line spacing: 1.5 lines****Formatted: Font: Not Bold****Formatted: Font: Not Bold****Formatted: Font: Not Italic****Formatted: Font: Italic****Formatted: Indent: Left: 0", Hanging: 0.5"**

- 1  
2  
3  
4  
5  
6  
7  
8  
9 1 5 [Hirunrassamee S, Ratanawijitrasin S. Does your health care depend on how your insurer pays providers? Variation in utilization and outcomes in Thailand. \*Int J Health Care Finance Econ\*. 2009;9\(2\):153-168.](#)
- 10 2  
11 3  
12 4  
13 5 6 Hughes D, Leethongdee S. Universal coverage in the land of smiles: lessons from Thailand's 30 Baht health reforms. *Health Aff (Millwood)*. 2007;26(4):999-1008.
- 14 6  
15 7  
16 8 67 The Rockefeller Foundation. Catalyzing Change: The System Reform Costs of Universal Health Coverage [Internet]. 2010 Nov 15 [cited on 2011 Mar 8]. Available from: <http://www.rockefellerfoundation.org/news/publications/catalyzing-change-system-reform-costs>.
- 17 9  
18 10  
19 11  
20 12  
21 13 ~~7~~ ~~Damrongplisit K, Melnick GA. Early results from Thailand's 30 Baht Health Reform: something to smile about. *Health Aff (Millwood)*. 2009; 28(3): w457-466.~~
- 22 14  
23 15  
24 16 88 [Tangcharoensathien V, Prakongsai P, Limwattanon S, Patcharanarumoi W, Jongudomsuk P. Achieving universal coverage in Thailand: what lessons do we learn? \[Internet\]. 2007 March \[cited on 2012 September 25\]. Available from: \[http://www.who.int/social\\\_determinants/resources/csdh\\\_media/universal\\\_coverage\\\_thailand\\\_2007\\\_en.pdf\]\(http://www.who.int/social\_determinants/resources/csdh\_media/universal\_coverage\_thailand\_2007\_en.pdf\)](#)
- 25 17  
26 18  
27 19  
28 20  
29 21  
30 22 9 Tangcharoensathien V, Wibulpholprasert S, Nitayaramphong S. Knowledge-based changes to health systems: the Thai experience in policy development. *Bull. World Health Organ*. 2004;82(10):750-756.
- 31 23  
32 24  
33 25  
34 26 910 [Pitaknetinan K, Tangcharoensathien V, Supachutikul A, Bennett S, Mills A. Profit, payment and pharmaceutical practices: Perspectives from hospitals in Bangkok. \*Health Policy\*. 1999;46\(3\):179-194.](#)
- 35 27  
36 28  
37 29  
38 30  
39 31 11 [World Bank. Waivers and exemptions for health services in developing countries \[Internet\]. 2002 October \[cited on 2012 October 1\]. Available from: <http://siteresources.worldbank.org/SOCIALPROTECTION/Resources/SP-Discussion-papers/Safety-Nets-DP/0308.pdf>](#)
- 40 32  
41 33  
42 34  
43 35 12 NaRanong V, NaRanong A, Treamworakul S. Universal Health Coverage Schemes in Thailand 2002-2003, Research Report No.1: Monitoring and Evaluating Universal Health Care Coverage in Thailand, Phase II, 2003-04. Bangkok: Thailand Development Research Institute; 2004.
- 44 36  
45 37  
46 38  
47 39  
48 40 ~~13~~ Kaufman N, Chasombat S, Tanomsingh S, Rajataramya B, Potempa K. Public health in Thailand: emerging focus on non-communicable diseases. *Int J Health Plann Manage*. 2011; 26(3): e197-212
- 49 41  
50 42  
51 43  
52 44 ~~14~~ Bundhamcharoen K, Odton P, Phulkerd S, Tangcharoensathien V. Burden of disease in Thailand: changes in health gap between 1999 and 2004. *BMC Public Health*. 2011;11: 53.
- 53  
54  
55  
56  
57  
58  
59  
60

Formatted: Space Before: 0.1 pt, After: 0.1 pt

Formatted: Font: Times New Roman, 12 pt

Formatted: Indent: Left: 0", Hanging: 0.5", Space Before: 0.1 pt, After: 0.1 pt

Formatted: Normal

Formatted: z3988

Formatted: Indent: Left: 0", Hanging: 0.5", Space Before: 0.1 pt, After: 0.1 pt

Formatted: Font: Not Italic

Formatted: Space Before: 0.1 pt, After: 0.1 pt

Formatted: Font: Italic

Formatted: Indent: Left: 0", Hanging: 0.5"

1  
2  
3  
4  
5  
6  
7  
8  
9  
10  
11  
12  
13  
14  
15  
16  
17  
18  
19  
20  
21  
22  
23  
24  
25  
26  
27  
28  
29  
30  
31  
32  
33  
34  
35  
36  
37  
38  
39  
40  
41  
42  
43  
44  
45  
46  
53  
54  
55  
56  
57  
58  
59  
60

- ~~15~~ World Health Organization. Thailand: Health Profile [Internet]. 2011 Apr 11-[cited 2012 Feb 8]. Available from: <http://www.who.int/gho/countries/tha.pdf>
- ~~16~~ Porapakkham Y, Rao C, Pattaraarchachai J, et al. Estimated causes of death in Thailand, 2005: implications for health policy. *Population Health Metrics*. 2010;-8(1):-14.-
- ~~17~~ Beaglehole R, Bonita R, Horton R, et al. Priority actions for the non-communicable disease crisis. *Lancet*. 2011;-377(9775):-1438-1447.
- ~~18~~ IMS Health MIDAS. 1998-2006.
- ~~19~~ European Pharmaceutical Market Research Association (EphMRA). Anatomical Classification [Internet]. 2012 [cited 2012 Feb 6].- Available from: <http://www.ephmra.org/classification/anatomical-classification.aspx>
- ~~20~~ The World Bank. Data [Internet]. 2011 [cited 2011 May13]. -Available from: <http://data.worldbank.org/>
- ~~21~~ Wagner AK, Soumerai SB, Zhang F, Ross-Degnan D. Segmented regression analysis of interrupted time series studies in medication use research. *J Clin Pharm Ther*. 2002; 27(4):-299-309.-
- ~~22~~ Shadish WR, Cook TD, Campbell DT. Experimental and quasi-experimental designs for generalized causal inference. Boston: Houghton Mifflin Company; 2002.
- ~~23~~ Zhang F, Wagner AK, Soumerai SB, Ross-Degnan D. Methods for estimating confidence intervals in interrupted time series analyses of health interventions. *J Clin Epidemiol-ClinEpidemiol*. 2009;-62(2):-143-148.
- ~~24~~ United States.- Food and Drug Agency.-Recall of Interferon alfa-2b, (Recombinant), Powder for Injection, Intron A - (Schering Corporation) [Internet]. 2001 Oct 22 [cited 13 Oct 2011]. Available from: <http://www.fda.gov/Drugs/DevelopmentApprovalProcess/HowDrugsareDevelopedandApproved/ApprovalApplications/TherapeuticBiologicApplications/ucm113617.htm>
- 25 [Damrongplisit K, Melnick GA. Early results from Thailand's 30 Baht Health Reform: something to smile about. \*Health Aff \(Millwood\)\*. 2009;28\(3\):w457-466.](#)
- 26 Yiengprugsawan V, Carmichael G, Lim L, Seubsman S, Sleight A. Explanation of inequality in utilization of ambulatory care before and after universal health insurance in Thailand. *Health Policy Plan*. 2011; 26(2): 105-14.
- 27 [Ten Kate D. Safe at any costs? Asia Sentinel \(Hong Kong\) \[Internet\]. 2001 Jan 4 \[cited 2012 Feb 6\]. Available from:](#)

Formatted: Space Before: 0.1 pt, After: 0.1 pt

Formatted: Space Before: 0.1 pt, After: 0.1 pt

Formatted: Normal, Indent: Left: 0", Hanging: 0.5"

Formatted: Normal, Indent: Left: 0", Hanging: 0.5"

Formatted: Indent: Left: 0", Hanging: 0.5"

Formatted: Space Before: 0.1 pt, After: 0.1 pt

Formatted: Endnote Text, Indent: Left: 0", Hanging: 0.5"

Formatted: Normal, Indent: Left: 0", Hanging: 0.5"

Formatted: Font: 12 pt, Not Italic

[http://www.asiasentinel.com/index.php?option=com\\_content&task=view&id=351&Itemid=392](http://www.asiasentinel.com/index.php?option=com_content&task=view&id=351&Itemid=392)

- 28 Ratanawijitrasin S. Pharmaceutical policy in Thailand: a review of three decades of government interventions. In: Eggleston K, editor. Prescribing cultures and pharmaceutical policy in the Asia Pacific. Stanford: The Walter H. Shorenstein Asia-Pacific Research Center Books; 2009. p. 79–106.

Formatted: Space Before: 0.1 pt, After: 0.1 pt

- ~~24 Ten Kate D. 29 Safe at any costs? Asia Sentinel (Hong Kong) [Internet]. 2001 Jan 4 [cited 2012 Feb 6]. Available from: [http://www.asiasentinel.com/index.php?option=com\\_content&task=view&id=351&Itemid=392](http://www.asiasentinel.com/index.php?option=com_content&task=view&id=351&Itemid=392)~~

Formatted: Indent: Left: 0", Hanging: 0.5", Space Before: 0.1 pt, After: 0.1 pt

Formatted: Font: 12 pt, Not Italic

- ~~25 Bates, R. Local pharmaceutical production in developing countries: How economic protectionism undermines access to quality medicines. Campaign for Fighting Diseases discussion paper no. 1 [Internet]. 2008 Jan [cited Feb 7 2012]. Available from: [http://www.policynetwork.net/sites/default/files/local\\_drug\\_production.pdf](http://www.policynetwork.net/sites/default/files/local_drug_production.pdf).~~

- 26 Tangcharoensathien V, Jongudomsuk P. From policy to implementation: Historical events during 2001–2011 of universal coverage in Thailand. Bangkok, Thailand: National Health Security Office; 2012.

Formatted: Space Before: 0.1 pt, After: 0.1 pt

- ~~27 Hirunrassamee S, Ratanawijitrasin S. Does your health care depend on how your insurer pays providers? Variation in utilization and outcomes in Thailand. *Int J Health Care Finance Econ.* 2009; 9(2): 153–168.~~

Formatted: Endnote Text, Indent: Left: 0", Hanging: 0.5", Space Before: 0.1 pt, After: 0.1 pt

- 2830 Aekplakorn W, Abbott-Klafter J, Premgamone A, et al. Prevalence and management of diabetes and associated risk factors by regions of Thailand: Third National Health Examination Survey 2004. *Diabetes Care.* 2007;30:2007–2012

- 31 Aekplakorn W, Abbott-Klafter J, Khonputsu P, Tatsanavivat P, Chongsuvivatwong V, Chariyalertsak S, et al. Prevalence and management of prehypertension and hypertension by geographic regions of Thailand: the Third National Health Examination Survey, 2004. *J Hypertens.* 2008; 26:191–198.

- 32 IMS Health. IMS Thailand Market Prognosis. 2012.

Formatted: Space Before: 0.1 pt, After: 0.1 pt

- 2933 IMS Health. Pharma Pricing and Reimbursement. 2011 Mar; 16(3).

Formatted: Indent: Left: 0", Hanging: 0.5", Space Before: 0.1 pt, After: 0.1 pt

- 3034 Khanna R. Universal Health Coverage in Thailand: What Lessons Can India Learn? [Internet]. 2010 Dec 16 [cited 2012 Feb 7]. Available from: <http://www.mfcindia.org/main/bgpapers/bgpapers2011/am/bgpap2011r.pdf>

Formatted: Space Before: 0.1 pt, After: 0.1 pt

Formatted: Normal, Indent: Left: 0", Hanging: 0.5"

- 3135 Treerutkuarkul A. Thailand: health care for all, at a price. *Bull World Health Organ.* 2010; 88(2): 84–5.

Formatted: Space Before: 0.1 pt, After: 0.1 pt



1  
2  
3  
4  
5  
6  
7  
8  
9  
10  
11  
12  
13  
14  
15  
16  
17  
18  
19  
20  
21  
22  
23  
24  
25  
26  
27  
28  
29  
30  
31  
32  
33  
34  
35  
36  
37  
38  
39  
40  
41  
42  
43  
44  
45  
46  
47  
48  
49  
50  
51  
52  
53  
54  
55  
56  
57  
58  
59  
60

3236 Pitayarangsarit S. The Introduction of the Universal Coverage of Health Care Policy in Thailand: Policy Responses [PhD thesis]. -London, UK: London School of Hygiene and Tropical Medicine; 2004 [cited 2012 Feb 7]. Available from: [http://www.nhso.go.th/eng/download/The%20Introduction%20of%20the%20Universal%20Coverage%20of%20Health%20Care%20Policy%20in%20Thailand\\_%20Policy%20Responses.pdf](http://www.nhso.go.th/eng/download/The%20Introduction%20of%20the%20Universal%20Coverage%20of%20Health%20Care%20Policy%20in%20Thailand_%20Policy%20Responses.pdf)

Formatted: Space Before: 0.1 pt, After: 0.1 pt  
Formatted: Font: Not Italic

For peer review only

TABLES

**Table 1. Summary of the Impact of the Universal Coverage Scheme on Volume in the Hospital Sector (from segmented regression results) \***

| Therapeutic Area              | Pre-policy trend | Immediate change after policy | Post-policy trend change |
|-------------------------------|------------------|-------------------------------|--------------------------|
| <b>DIABETES</b>               |                  |                               |                          |
| Antidiabetics**               | ↑                |                               | ↑                        |
| Insulins**                    | ↑                | ↑                             | ↑                        |
| <b>CARDIOVASCULAR DISEASE</b> |                  |                               |                          |
| Antihypertensives             | ↑                | ↓                             | ↑                        |
| Lipid Regulating Agents**     | ↑                |                               | ↑                        |
| Cardiac Therapy               | ↑                | ↓                             |                          |
| <b>CANCER</b>                 |                  |                               |                          |
| Antineoplastics               | ↑                |                               |                          |
| Cytostatic Hormones           | ↑                |                               | ↑                        |
| Immunostimulating Agents**    | ↑                | ↓                             |                          |

\*Arrows signify a statistically significant coefficient (p<0.05) from segmented regression with linear post-policy trend term, unless noted otherwise.

\*\*Quadratic model (which has a squared post-policy trend term) fits better than linear model.

Note: See online appendix Table 2 and Figures 1-8 for regression coefficients and figures for all therapeutic areas.

6

7

**Table 2. Relative Impact of UCS on Sales of Medicines by Class (one and five years post policy)\***

| Therapeutic Class        | One Year Impact (in standard units) |          |                              | Five Year Impact (in standard units) |          |                              |
|--------------------------|-------------------------------------|----------|------------------------------|--------------------------------------|----------|------------------------------|
|                          | Predicted                           | Observed | Relative Change (95% CI)     | Predicted                            | Observed | Relative Change (95% CI)     |
| Antidiabetics            | 2602.91                             | 2769.79  | 6.4% (-6.9, 19.7)            | 3669.13                              | 5090.62  | <b>38.7% (13.5, 64.0)</b>    |
| Insulins                 | 3.30                                | 4.45     | <b>34.8% (15.1, 54.5)</b>    | 4.58                                 | 12.56    | <b>174.4% (113.9, 235.0)</b> |
| Cardiac Therapy Agents   | 699.28                              | 607.27   | -13.2% (-26.9, 0.6)          | 908.12                               | 825.49   | -9.1% (-31.9, 13.1)          |
| Lipid Regulating Agents  | 522.34                              | 504.58   | -3.4% (-19.9, 13.1)          | 781.97                               | 1629.11  | <b>108.3% (59.8, 156.9)</b>  |
| Antihypertensives        | 3521.47                             | 3418.79  | -2.9% (-15.5, 9.7)           | 5200.86                              | 6177.49  | 18.8% (-2.8, 40.3)**         |
| Antineoplastics          | 35.38                               | 34.21    | -3.3% (-15.4, 8.7)           | 46.14                                | 48.13    | 4.3% (-16.3, 24.9)           |
| Cytostatic Hormones      | 29.48                               | 30.58    | 3.7% (-10.1, 17.6)           | 39.82                                | 47.52    | 19.3% (-5.1, 43.8)           |
| Immunostimulating Agents | 0.65                                | 0.43     | <b>-35.0% (-45.1, -25.0)</b> | 0.81                                 | 0.60     | <b>-26.3% (-45.0, -7.6)</b>  |

\*Bold signifies that the change is statistically significant (i.e., confidence interval does not include the null value of 0).

\*\*If the absolute five-year difference, which is estimated using more precise method, is significant. See online appendix Table 4.3.

11

12

13

14

15

16

**Table 3. Immediate Impact of UCS on Hospital Sector Market Share\***

16

52

53

54

55

56

57

58

59

60

| Therapeutic Area                | Licensing Status   | Immediate post-policy absolute change in % market share (95% CI) |
|---------------------------------|--------------------|------------------------------------------------------------------|
| <b>DIABETES</b>                 |                    |                                                                  |
| <b>Antidiabetics</b>            | Originator brand   | -0.3% (-1.6, 1.0)                                                |
|                                 | Branded generic    | <b>-12.3% (-16.0, -8.7)</b>                                      |
|                                 | Generic            | <b>-3.5% (-5.8, -1.1)</b>                                        |
|                                 | GPO                | <b>16.1% (12.0, 20.2)</b>                                        |
| <b>Insulins***</b>              | Originator brand** | -0.04% (-0.4, 0.3)                                               |
|                                 | Branded generic    | <b>7.0% (2.9, 11.1)</b>                                          |
|                                 | Generic            | <b>-6.2% (-10.3, -2.1)</b>                                       |
| <b>CARDIOVASCULAR DISEASE</b>   |                    |                                                                  |
| <b>Antihypertensives</b>        | Originator brand** | -0.1% (-2.3, 2.0)                                                |
|                                 | Branded generic**  | -0.2% (-6.1, 1.8)                                                |
|                                 | Generic            | <b>-5.7% (-8.3, -3.0)</b>                                        |
|                                 | GPO                | 5.3% (-0.1, 10.6)                                                |
| <b>Lipid Regulating Agents</b>  | Originator brand** | <b>-7.8% (-10.2, -5.4)</b>                                       |
|                                 | Branded generic**  | <b>7.6% (5.1, 10.0)</b>                                          |
|                                 | Generic            | 0.2% (-0.4, 0.7)                                                 |
|                                 | GPO                | 0.2% (-0.3, 0.8)                                                 |
| <b>Cardiac Therapy</b>          | Originator brand   | 0.1% (-0.8, 1.0)                                                 |
|                                 | Branded generic**  | <b>-13.5% (-20.5, -6.5)</b>                                      |
|                                 | Generic            | <b>-4.3% (-6.2, -2.4)</b>                                        |
|                                 | GPO                | <b>21.6% (15.0, 28.1)</b>                                        |
| <b>CANCER***</b>                |                    |                                                                  |
| <b>Antineoplastics</b>          | Originator brand   | 1.1% (-1.0, 3.2)                                                 |
|                                 | Branded generic    | -1.0% (-5.4, 3.4)                                                |
|                                 | Generic            | 0.4% (-2.7, 3.4)                                                 |
| <b>Cytostatic Hormones</b>      | Originator brand** | 0.4% (-5.4, 6.1)                                                 |
|                                 | Branded generic**  | <b>-7.7% (-12.0, -3.5)</b>                                       |
|                                 | Generic**          | <b>6.0% (1.4, 10.6)</b>                                          |
| <b>Immunostimulating Agents</b> | Originator brand   | <b>-6.4% (-9.7, -3.0)</b>                                        |
|                                 | Branded generic    | <b>4.5% (1.7, 7.3)</b>                                           |
|                                 | Generic            | -0.2% (-0.3, 0.02)                                               |

\***Bold** signifies a statistically significant regression coefficient ( $p < 0.05$ ). Changes are in absolute terms (i.e., percentage point change).

\*\*Quadratic model (which has a squared post-policy term) fits better than linear model.

\*\*\*GPO did not produce any insulins or cancer medicines during the study period.

Note 1: See online appendix Table 54 and Figures 9-16 for market share regression coefficients and figures for all therapeutic areas

Note 2: Aside from the immediate level changes following the policy, there were few major changes in market share. See online appendix, Table

65 for absolute one- and five-year differences.

**Figure Index (attached in separate document):\***

1  
2  
3  
4  
5  
6  
7  
8  
9 | **Figure 1.** Standard Units Per Capita by Quarter: Insulin (Hospital vs. Retail)

10 | **Figure 2.** Standard Units Per Capita by Quarter: Antihypertensives (Hospital vs. Retail)

11 | **Figure 3.** Licensing Status Market Share by Quarter: Antidiabetics (Hospital Sector)

12 | **Figure 4.** Licensing Status Market Share by Quarter: Cardiac Therapy Products (Hospital Sector)

13 | \*The grey box in each figure represents the 3-quarter UCS roll-out period.

14 | **Online appendix (attached in separate document)**

1  
2  
3  
4  
5  
6  
7  
8  
9  
10  
11  
12  
13  
14  
15  
16  
17  
18  
19  
20  
21  
22  
23  
24  
25  
26  
27  
28  
29  
30  
31  
32  
33  
34  
35  
36  
37  
38  
39  
40  
41  
42  
43  
44  
45  
46  
47  
48  
49  
50  
51  
52  
53  
54  
55  
56  
57  
58  
59  
60

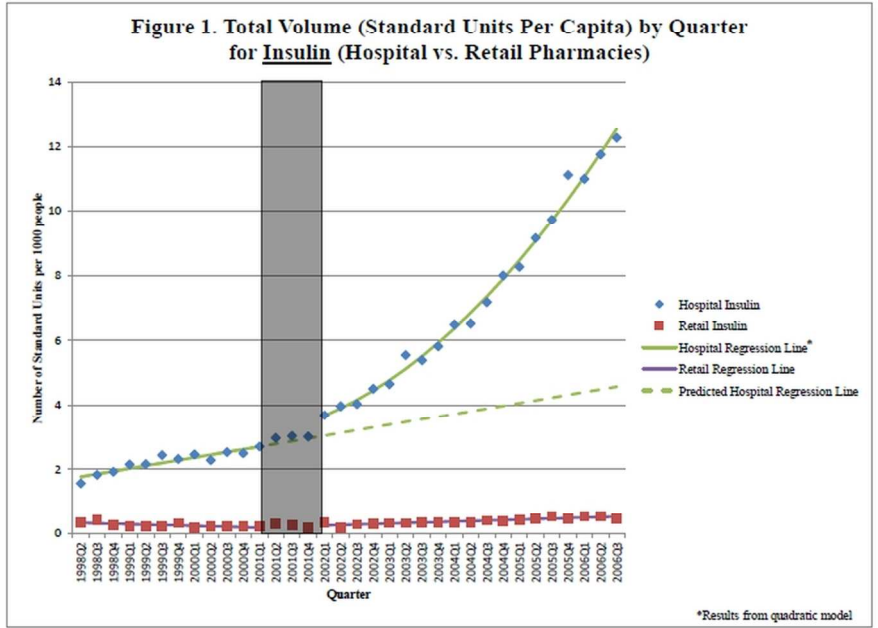

117x90mm (300 x 300 DPI)

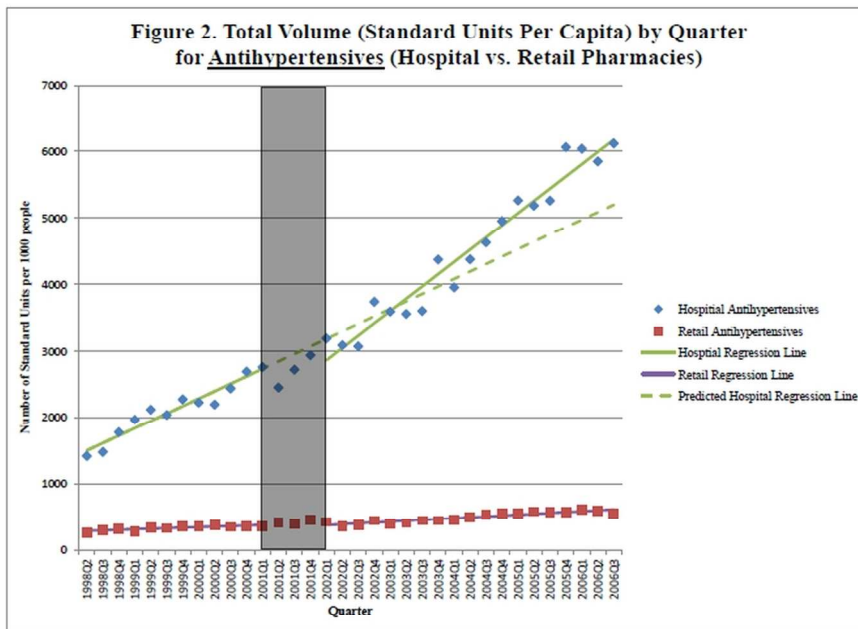

116x90mm (300 x 300 DPI)

Review only

1  
2  
3  
4  
5  
6  
7  
8  
9  
10  
11  
12  
13  
14  
15  
16  
17  
18  
19  
20  
21  
22  
23  
24  
25  
26  
27  
28  
29  
30  
31  
32  
33  
34  
35  
36  
37  
38  
39  
40  
41  
42  
43  
44  
45  
46  
47  
48  
49  
50  
51  
52  
53  
54  
55  
56  
57  
58  
59  
60

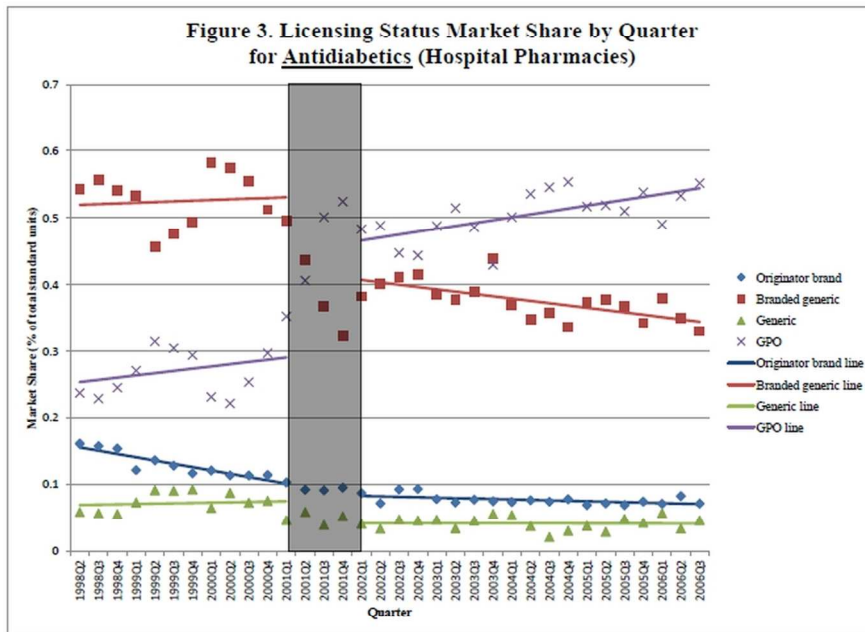

116x90mm (300 x 300 DPI)

1  
2  
3  
4  
5  
6  
7  
8  
9  
10  
11  
12  
13  
14  
15  
16  
17  
18  
19  
20  
21  
22  
23  
24  
25  
26  
27  
28  
29  
30  
31  
32  
33  
34  
35  
36  
37  
38  
39  
40  
41  
42  
43  
44  
45  
46  
47  
48  
49  
50  
51  
52  
53  
54  
55  
56  
57  
58  
59  
60

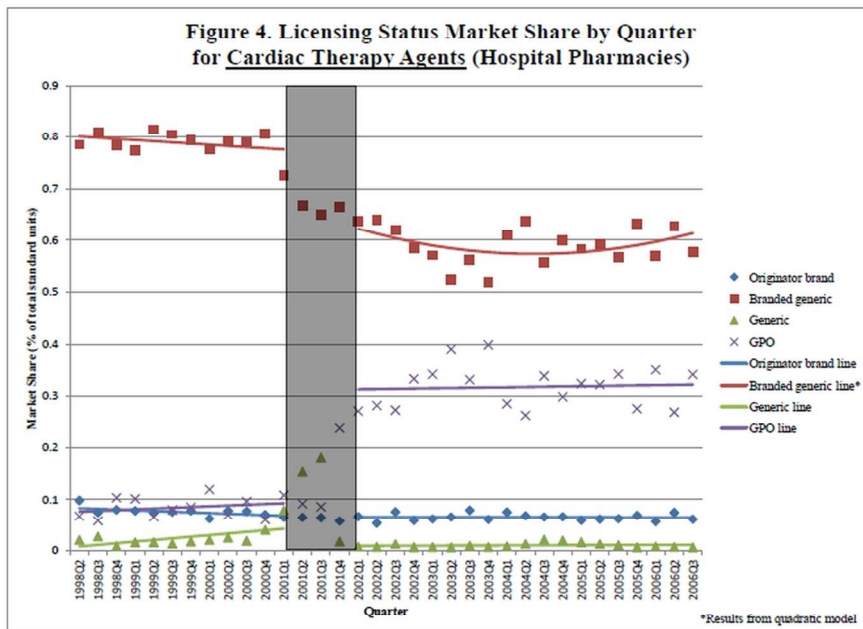

117x90mm (300 x 300 DPI)
